# Supplementary material for: The need for isotopic data on refractory elements in the solar wind
Source: Royal Society of Chemistry journal article supplement (doi:10.1039/d2dt00681b), 1986-01-01
Supplement: d2dt00681b1.pdf [file d2dt00681b1.pdf]

Supporting Information

Content

|                                                                                         |    |
|-----------------------------------------------------------------------------------------|----|
| Data of crystallography .....                                                           | 2  |
| NMR spectra of compound <b>2</b> .....                                                  | 6  |
| NMR spectra of compound <b>3</b> .....                                                  | 9  |
| NMR spectra of compound <b>4</b> .....                                                  | 12 |
| NMR spectra of compound <b>5</b> .....                                                  | 17 |
| NMR spectra of compound <b>6</b> .....                                                  | 23 |
| NMR spectra of compound <b>7</b> .....                                                  | 28 |
| NMR spectra of compound <b>8</b> .....                                                  | 33 |
| NMR spectra of compound <b>9a</b> .....                                                 | 37 |
| NMR spectra of compound <b>9b</b> .....                                                 | 40 |
| NMR spectra of compound <b>10</b> .....                                                 | 43 |
| NMR spectra of compound <b>11a</b> .....                                                | 49 |
| NMR spectra of compound <b>11b</b> .....                                                | 54 |
| NMR spectra of compound <b>12</b> .....                                                 | 59 |
| NMR spectra of compound <b>13</b> .....                                                 | 66 |
| NMR spectra of compound <b>14</b> .....                                                 | 72 |
| NMR spectra of compound <b>15</b> .....                                                 | 77 |
| NMR spectra of compound <b>16</b> .....                                                 | 82 |
| NMR spectra of compound <b>17</b> .....                                                 | 84 |
| NMR spectroscopic analysis of distannanes ArSnH <sub>2</sub> -SnH <sub>2</sub> Ar ..... | 87 |

# Data of crystallography

Table 1. Data of crystal structure determination.

|                                                                                      | 3                                                                 | 4                                                                                                                           | 5                                                                                                                       | 7                                                                 | 8                                                                                               | 9b                                                                | 11b                                                                | 13                                                                                                                   | 14                                                                                               | 16                                                                |
|--------------------------------------------------------------------------------------|-------------------------------------------------------------------|-----------------------------------------------------------------------------------------------------------------------------|-------------------------------------------------------------------------------------------------------------------------|-------------------------------------------------------------------|-------------------------------------------------------------------------------------------------|-------------------------------------------------------------------|--------------------------------------------------------------------|----------------------------------------------------------------------------------------------------------------------|--------------------------------------------------------------------------------------------------|-------------------------------------------------------------------|
| Emp. formula                                                                         | C <sub>24</sub> H <sub>52</sub> GeSi <sub>4</sub>                 | C <sub>32</sub> H <sub>65</sub> Br <sub>2</sub> LiO <sub>2</sub> Si <sub>4</sub> Sn · 0.5 (C <sub>6</sub> H <sub>14</sub> ) | 2 (C <sub>32</sub> H <sub>65</sub> Br <sub>2</sub> LiO <sub>2</sub> PbSi <sub>4</sub> ), C <sub>5</sub> H <sub>12</sub> | C <sub>24</sub> H <sub>52</sub> Si <sub>4</sub> Sn                | C <sub>60</sub> H <sub>126</sub> Ge <sub>2</sub> Li <sub>2</sub> O <sub>3</sub> Si <sub>8</sub> | C <sub>40</sub> H <sub>82</sub> GeKO <sub>2</sub> Si <sub>4</sub> | C <sub>36</sub> H <sub>75</sub> KO <sub>6</sub> Si <sub>4</sub> Sn | C <sub>16</sub> AlF <sub>36</sub> O <sub>4</sub> , C <sub>32</sub> H <sub>67</sub> O <sub>2</sub> Si <sub>4</sub> Sn | C <sub>48</sub> H <sub>102</sub> Si <sub>8</sub> Sn <sub>2</sub> , C <sub>6</sub> H <sub>6</sub> | C <sub>49</sub> H <sub>68</sub> GeN <sub>2</sub>                  |
| <i>M</i> [g/mol]                                                                     | 525.63                                                            | 922.73                                                                                                                      | 2008.43                                                                                                                 | 571.73                                                            | 1279.44                                                                                         | 899.10                                                            | 874.13                                                             | 1682.07                                                                                                              | 1219.54                                                                                          | 757.66                                                            |
| $\lambda$ [Å]                                                                        | 0.71073                                                           | 0.71073                                                                                                                     | 0.71073                                                                                                                 | 0.71073                                                           | 0.71073                                                                                         | 0.71073                                                           | 0.71073                                                            | 0.71073                                                                                                              | 0.71073                                                                                          | 0.71073                                                           |
| <i>T</i> [K]                                                                         | 100(2)                                                            | 100(2)                                                                                                                      | 100(2)                                                                                                                  | 130(2)                                                            | 100(2)                                                                                          | 117(2)                                                            | 100(2)                                                             | 100(2)                                                                                                               | 170(2)                                                                                           | 100(2)                                                            |
| crystal system                                                                       | triclinic                                                         | triclinic                                                                                                                   | triclinic                                                                                                               | monoclinic                                                        | triclinic                                                                                       | monoclinic                                                        | orthorhombic                                                       | triclinic                                                                                                            | triclinic                                                                                        | triclinic                                                         |
| space group                                                                          | <i>P</i> -1                                                       | <i>P</i> -1                                                                                                                 | <i>P</i> -1                                                                                                             | <i>P</i> 2 <sub>1</sub> / <i>n</i>                                | <i>P</i> -1                                                                                     | <i>P</i> 2 <sub>1</sub> / <i>c</i>                                | <i>P</i> <i>n</i> a 2 <sub>1</sub>                                 | <i>P</i> -1                                                                                                          | <i>P</i> -1                                                                                      | <i>P</i> -1                                                       |
| <i>Z</i>                                                                             | 2                                                                 | 2                                                                                                                           | 1                                                                                                                       | 4                                                                 | 4                                                                                               | 4                                                                 | 4                                                                  | 2                                                                                                                    | 1                                                                                                | 2                                                                 |
| <i>a</i> [Å]                                                                         | 10.8467(4)                                                        | 9.4333(3)                                                                                                                   | 9.40780(10)                                                                                                             | 16.6242(4)                                                        | 14.0474(4)                                                                                      | 15.8808(5)                                                        | 25.4342(3)                                                         | 12.5225(4)                                                                                                           | 9.1345(2)                                                                                        | 12.3798(4)                                                        |
| <i>b</i> [Å]                                                                         | 12.2159(4)                                                        | 12.6264(4)                                                                                                                  | 12.5125(2)                                                                                                              | 9.1360(2)                                                         | 22.5485(6)                                                                                      | 14.7774(5)                                                        | 9.56500(10)                                                        | 16.1355(5)                                                                                                           | 12.1875(3)                                                                                       | 13.1930(4)                                                        |
| <i>c</i> [Å]                                                                         | 13.8073(4)                                                        | 20.6027(6)                                                                                                                  | 20.8396(3)                                                                                                              | 21.6779(5)                                                        | 27.1022(7)                                                                                      | 23.6977(8)                                                        | 19.6290(3)                                                         | 18.0799(5)                                                                                                           | 17.1264(3)                                                                                       | 14.5014(5)                                                        |
| $\alpha$ [°]                                                                         | 66.376(2)                                                         | 89.2150(10)                                                                                                                 | 89.4300(10)                                                                                                             | 90                                                                | 113.6040(10)                                                                                    | 90                                                                | 90                                                                 | 103.153(2)                                                                                                           | 108.1370(10)                                                                                     | 76.764(2)                                                         |
| $\beta$ [°]                                                                          | 75.966(2)                                                         | 89.8210(10)                                                                                                                 | 88.5550(10)                                                                                                             | 101.7770(10)                                                      | 95.4590(10)                                                                                     | 107.598(2)                                                        | 90                                                                 | 100.644(2)                                                                                                           | 95.7350(10)                                                                                      | 74.374(2)                                                         |
| $\gamma$ [°]                                                                         | 76.691(2)                                                         | 71.5940(10)                                                                                                                 | 72.1210(10)                                                                                                             | 90                                                                | 95.6420(10)                                                                                     | 90                                                                | 90                                                                 | 93.328(2)                                                                                                            | 104.1100(10)                                                                                     | 86.728(2)                                                         |
| <i>V</i> [Å <sup>3</sup> ]                                                           | 1607.83(10)                                                       | 2328.20(13)                                                                                                                 | 2333.92(6)                                                                                                              | 3223.10(13)                                                       | 7742.6(4)                                                                                       | 5301.0(3)                                                         | 4775.31(10)                                                        | 3476.95(19)                                                                                                          | 1724.96(7)                                                                                       | 2220.31(13)                                                       |
| <i>D<sub>c</sub></i> [g/cm <sup>3</sup> ]                                            | 1.086                                                             | 1.316                                                                                                                       | 1.429                                                                                                                   | 1.178                                                             | 1.098                                                                                           | 1.127                                                             | 1.216                                                              | 1.607                                                                                                                | 1.174                                                                                            | 1.133                                                             |
| $\mu$ [mm <sup>-1</sup> ]                                                            | 1.111                                                             | 2.394                                                                                                                       | 5.454                                                                                                                   | 0.950                                                             | 0.936                                                                                           | 0.785                                                             | 0.759                                                              | 0.588                                                                                                                | 0.892                                                                                            | 0.723                                                             |
| F(000)                                                                               | 568                                                               | 954                                                                                                                         | 1010                                                                                                                    | 1208                                                              | 2768                                                                                            | 1940                                                              | 1856                                                               | 1692                                                                                                                 | 644                                                                                              | 816                                                               |
| crystal size [mm]                                                                    | 0.220x0.170x0.140                                                 | 0.210x0.180x0.170                                                                                                           | 0.312x0.267x0.178                                                                                                       | 0.230x0.210x0.190                                                 | 0.220x0.200x0.170                                                                               | 0.220x0.200x0.160                                                 | 0.190x0.170x0.160                                                  | 0.180x0.170x0.150                                                                                                    | 0.220x0.210x0.180                                                                                | 0.440x0.331x0.188                                                 |
| $\theta$ range [°]                                                                   | 1.633 – 27.156                                                    | 2.966 – 27.266                                                                                                              | 2.561 – 30.541                                                                                                          | 2.819 – 27.366                                                    | 2.224 – 31.494                                                                                  | 1.803 – 27.490                                                    | 1.601 – 29.611                                                     | 1.664 – 24.640                                                                                                       | 2.912 – 28.152                                                                                   | 1.923 – 27.979                                                    |
| limiting indices                                                                     | -13 ≤ <i>h</i> ≤ 13<br>-15 ≤ <i>k</i> ≤ 15<br>-17 ≤ <i>l</i> ≤ 17 | -12 ≤ <i>h</i> ≤ 11<br>-16 ≤ <i>k</i> ≤ 16<br>-26 ≤ <i>l</i> ≤ 26                                                           | -13 ≤ <i>h</i> ≤ 13<br>-17 ≤ <i>k</i> ≤ 17<br>-29 ≤ <i>l</i> ≤ 29                                                       | -21 ≤ <i>h</i> ≤ 21<br>-11 ≤ <i>k</i> ≤ 11<br>-27 ≤ <i>l</i> ≤ 27 | -20 ≤ <i>h</i> ≤ 20<br>-33 ≤ <i>k</i> ≤ 33<br>-39 ≤ <i>l</i> ≤ 38                               | -20 ≤ <i>h</i> ≤ 19<br>-19 ≤ <i>k</i> ≤ 19<br>-30 ≤ <i>l</i> ≤ 29 | -33 ≤ <i>h</i> ≤ 35<br>-13 ≤ <i>k</i> ≤ 13<br>-26 ≤ <i>l</i> ≤ 27  | -14 ≤ <i>h</i> ≤ 14<br>-18 ≤ <i>k</i> ≤ 18<br>-21 ≤ <i>l</i> ≤ 20                                                    | -12 ≤ <i>h</i> ≤ 12<br>-16 ≤ <i>k</i> ≤ 15<br>-22 ≤ <i>l</i> ≤ 22                                | -16 ≤ <i>h</i> ≤ 16<br>-17 ≤ <i>k</i> ≤ 17<br>-19 ≤ <i>l</i> ≤ 19 |
| refl. coll.                                                                          | 27919                                                             | 62977                                                                                                                       | 80930                                                                                                                   | 53525                                                             | 291213                                                                                          | 131244                                                            | 72216                                                              | 59241                                                                                                                | 35182                                                                                            | 61443                                                             |
| ind. refl.                                                                           | 6995                                                              | 10379                                                                                                                       | 14169                                                                                                                   | 7226                                                              | 50738                                                                                           | 11810                                                             | 12871                                                              | 11672                                                                                                                | 8352                                                                                             | 10590                                                             |
| <i>R</i> <sub>int</sub>                                                              | 0.0323                                                            | 0.0215                                                                                                                      | 0.0432                                                                                                                  | 0.0364                                                            | 0.0288                                                                                          | 0.0234                                                            | 0.0489                                                             | 0.0424                                                                                                               | 0.0215                                                                                           | 0.0263                                                            |
| completeness                                                                         | 99.1                                                              | 99.4                                                                                                                        | 99.7                                                                                                                    | 99.8                                                              | 99.7                                                                                            | 99.9                                                              | 99.8                                                               | 99.4                                                                                                                 | 99.7                                                                                             | 99.6                                                              |
| abs. correction                                                                      | multi-scan                                                        | multi-scan                                                                                                                  | multi-scan                                                                                                              | multi-scan                                                        | multi-scan                                                                                      | multi-scan                                                        | multi-scan                                                         | multi-scan                                                                                                           | multi-scan                                                                                       | multi-scan                                                        |
| max., min. trans.                                                                    | 0.7455, 0.6784                                                    | 0.7455, 0.6413                                                                                                              | 0.7461, 0.5708                                                                                                          | 0.7456, 0.6442                                                    | 0.7462, 0.6981                                                                                  | 0.7456, 0.6921                                                    | 0.7459, 0.7145                                                     | 0.7451, 0.6928                                                                                                       | 0.7456, 0.6932                                                                                   | 0.7456, 0.6618                                                    |
| Para./restr.                                                                         | 289/0                                                             | 438/184                                                                                                                     | 445/68                                                                                                                  | 279/0                                                             | 1466/0                                                                                          | 549/0                                                             | 455/1                                                              | 888/2                                                                                                                | 312/0                                                                                            | 489/0                                                             |
| <i>R</i> <sub>1</sub> , <i>wR</i> <sub>2</sub> [ <i>I</i> > 2 $\sigma$ ( <i>I</i> )] | 0.0358, 0.0908                                                    | 0.0298, 0.0761                                                                                                              | 0.0365, 0.0879                                                                                                          | 0.0402, 0.0816                                                    | 0.0331, 0.0740                                                                                  | 0.0300, 0.0747                                                    | 0.0266, 0.0505                                                     | 0.0546, 0.1339                                                                                                       | 0.0219, 0.0583                                                                                   | 0.0288, 0.0667                                                    |
| <i>R</i> <sub>1</sub> , <i>wR</i> <sub>2</sub> (all data)                            | 0.0527, 0.0981                                                    | 0.0359, 0.0792                                                                                                              | 0.0445, 0.0912                                                                                                          | 0.0529, 0.0849                                                    | 0.0533, 0.0812                                                                                  | 0.0420, 0.0816                                                    | 0.0348, 0.0533                                                     | 0.0739, 0.1469                                                                                                       | 0.0243, 0.0600                                                                                   | 0.0361, 0.0704                                                    |
| Goof on <i>F</i> <sup>2</sup>                                                        | 1.060                                                             | 1.018                                                                                                                       | 1.049                                                                                                                   | 1.122                                                             | 1.008                                                                                           | 1.055                                                             | 1.018                                                              | 1.032                                                                                                                | 1.065                                                                                            | 1.037                                                             |
| peak / hole [ <i>e</i> · Å <sup>-3</sup> ]                                           | 0.642, -0.744                                                     | 1.219, -1.381                                                                                                               | 2.728, -2.238                                                                                                           | 0.881, -0.812                                                     | 1.232, -0.854                                                                                   | 0.496, -0.331                                                     | 0.430, -0.247                                                      | 1.707, -1.020                                                                                                        | 0.717, -0.536                                                                                    | 0.462, -0.440                                                     |
| CCDC                                                                                 | 2153532                                                           | 2153539                                                                                                                     | 2153540                                                                                                                 | 2153561                                                           | 2153534                                                                                         | 2153536                                                           | 2153537                                                            | 2153538                                                                                                              | 2153535                                                                                          | 2153533                                                           |

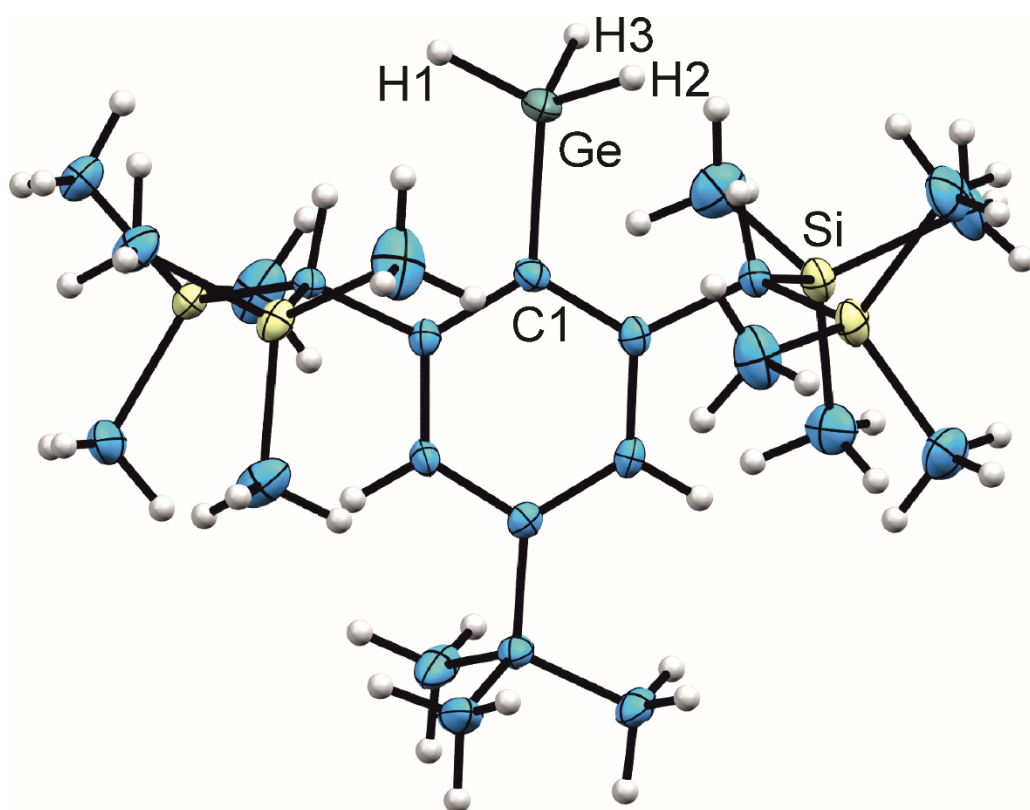

Figure S1. ORTEP of **3**. Hydrogen atoms connected to the germanium atom were found in the difference Fourier map. Other hydrogen atoms were placed in idealized positions. Ellipsoids at 50 % probability. Interatomic distance [Å]: Ge-C1 1.955(2).

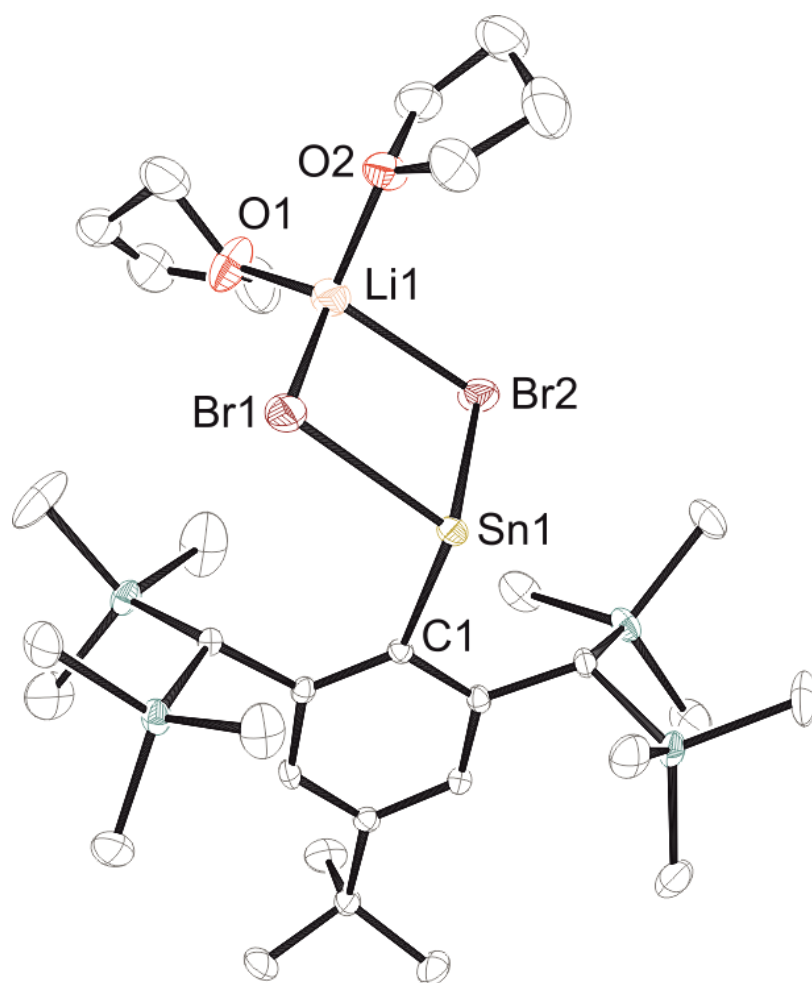

Figure S2. ORTEP of **4**. Hydrogen atoms, which are not shown, were placed in idealized positions. Ellipsoids at 50 % probability. Interatomic distance [Å], angles [°]: C1-Sn1 2.229(2), Br1-Sn1 2.7254(3), Br2-Sn1 2.7567(3), Li1-O1 1.874(5), Li1-O2 1.904(5), Li1-Br1 2.509(5), Li1-Br2 2.541(5), C1-Sn1-Br1 94.46(6), C1-Sn1-Br2 110.28(6), Br1-Sn1-Br2 87.48(1).

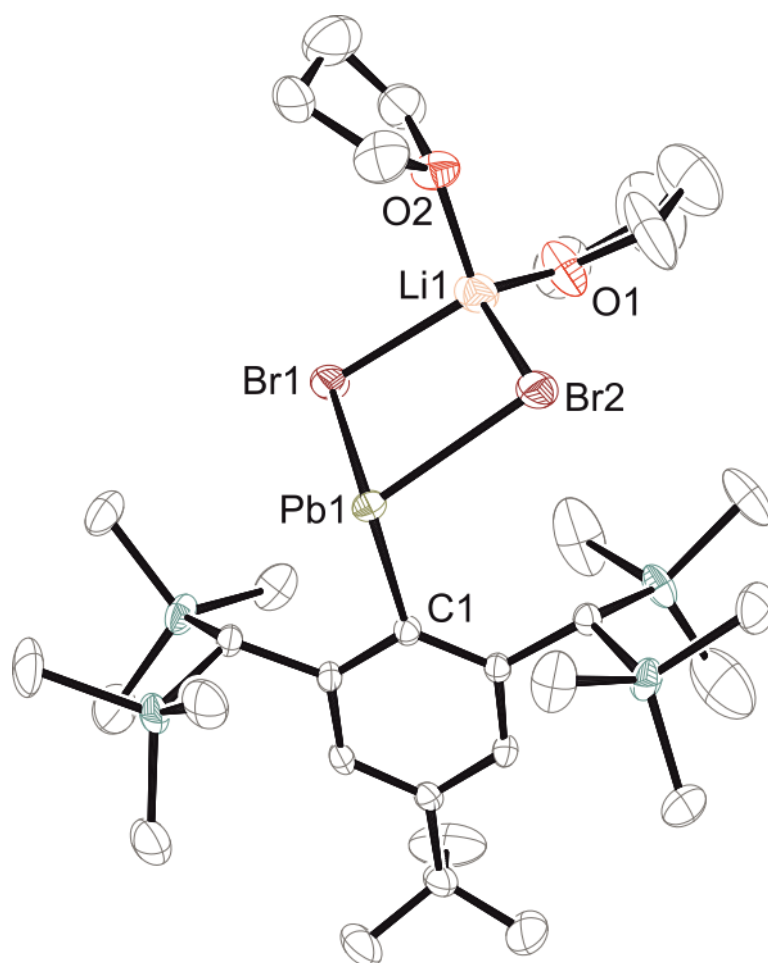

Figure S3. ORTEP of **5**. Hydrogen atoms, which are not shown, were placed in idealized positions. Ellipsoids at 50 % probability. Interatomic distance [Å], angles [°]: C1-Pb1 2.321(3), Pb1-Br1 2.8246(4), Pb1-Br2 2.8502(4), C1-Pb1-Br1 94.57(8), C1-Pb1-Br2 110.37(8), Br1-Pb1-Br2 86.74(1).

# NMR spectra of compound 2

$^1\text{H-NMR}$  of  $\text{TbbGeX}_3$  in  $\text{C}_6\text{D}_6$  (#) at rt

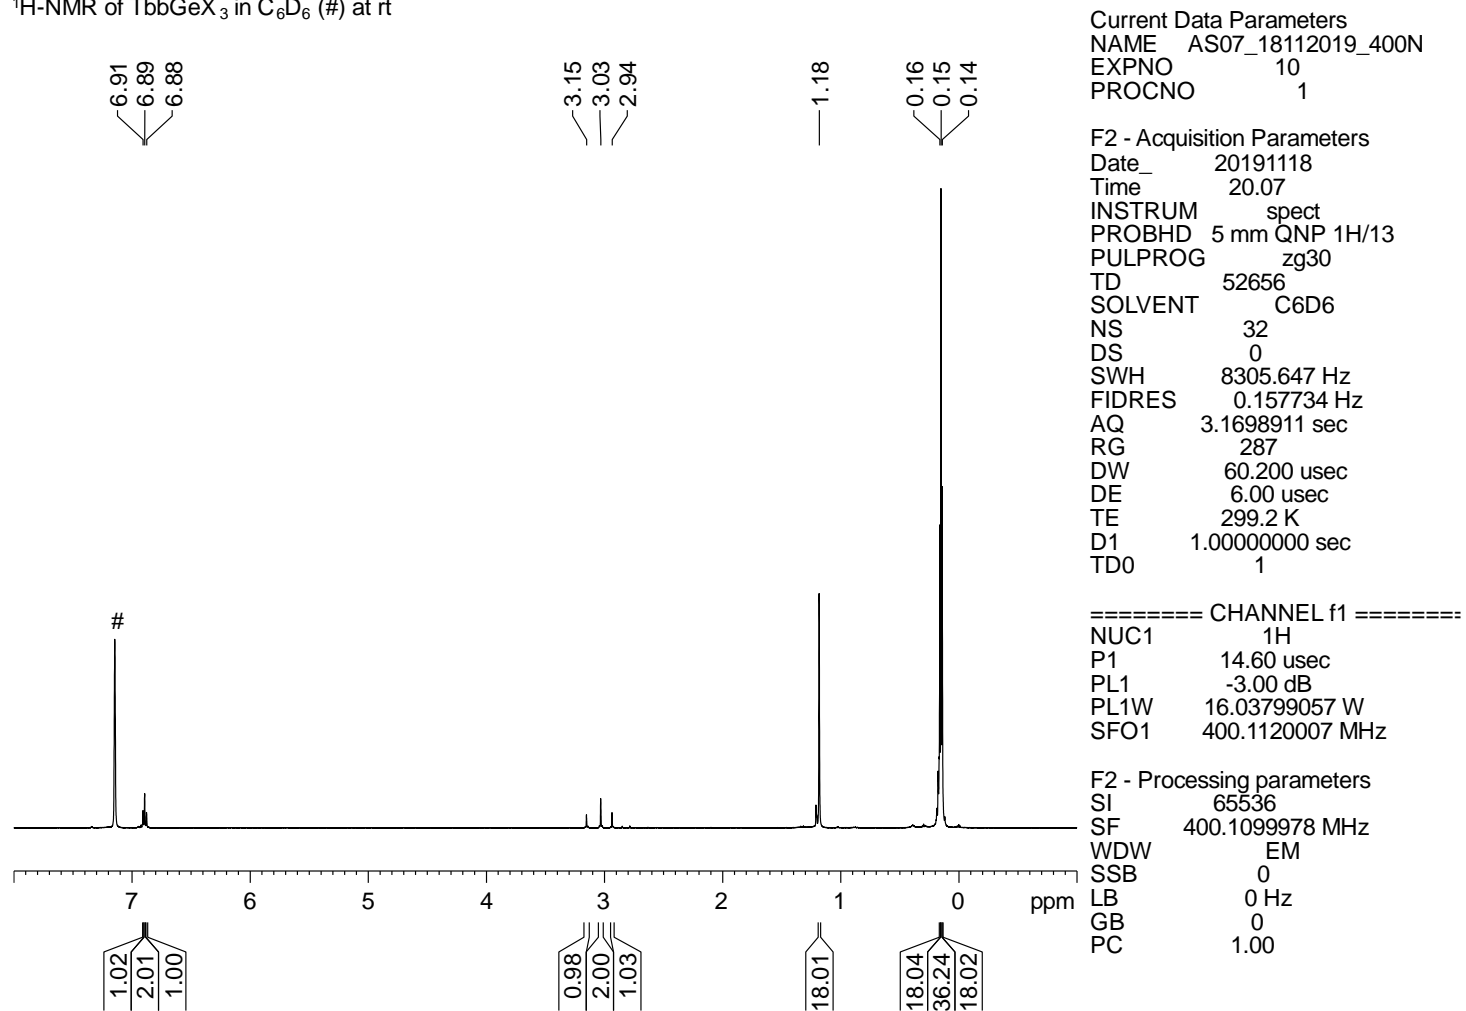

Figure S4.  $^1\text{H-NMR}$  spectrum of compound 2.

$^{13}\text{C}\{^1\text{H}\}$ -NMR of  $\text{TbbGeX}_3$  in  $\text{C}_6\text{D}_6$  (#) at rt

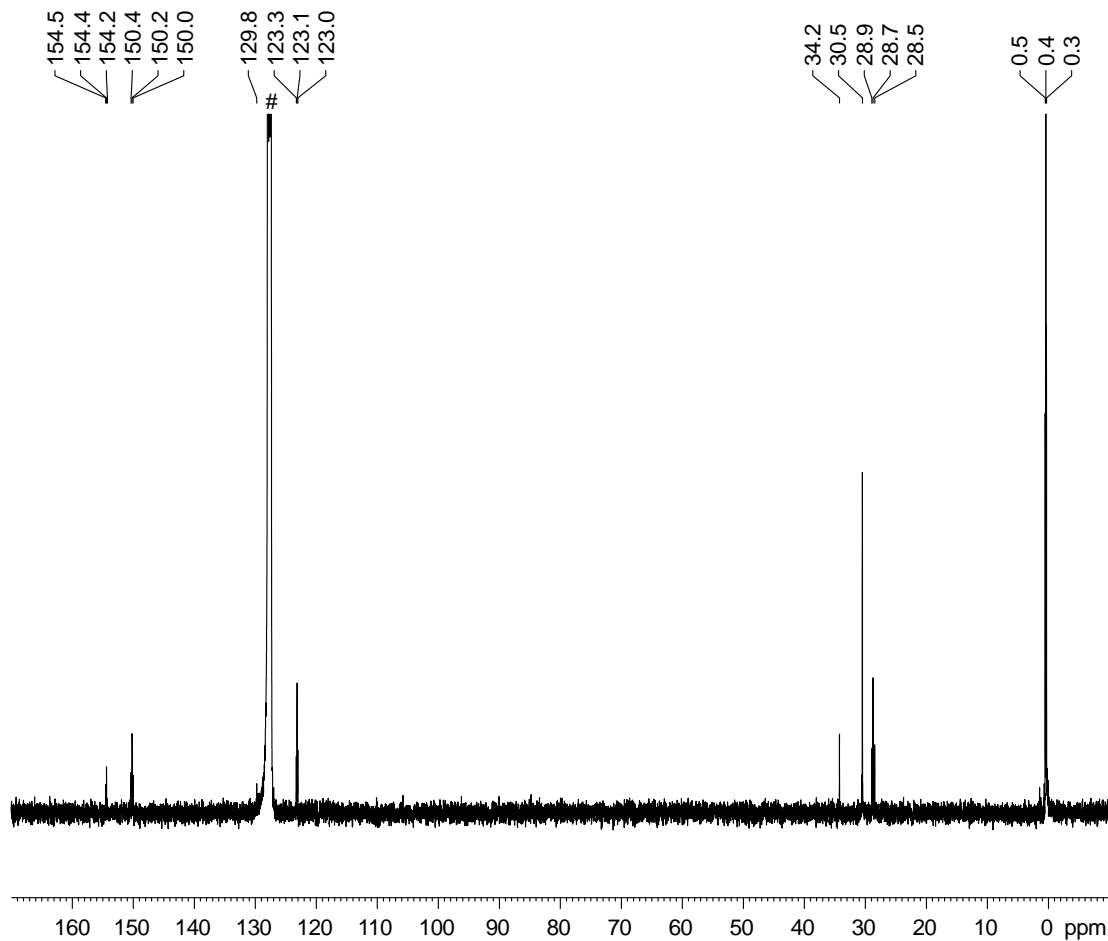

Current Data Parameters  
NAME AS07\_18112019\_400N  
EXPNO 11  
PROCNO 1

F2 - Acquisition Parameters  
Date\_ 20191119  
Time 1.29  
INSTRUM spect  
PROBHD 5 mm QNP 1H/13  
PULPROG zgpg30  
TD 53700  
SOLVENT C6D6  
NS 10000  
DS 0  
SWH 30864.197 Hz  
FIDRES 0.574752 Hz  
AQ 0.8699400 sec  
RG 32800  
DW 16.200 usec  
DE 6.00 usec  
TE 299.2 K  
D1 1.00000000 sec  
D11 0.03000000 sec  
TD0 1

===== CHANNEL f1 =====  
NUC1 13C  
P1 13.50 usec  
PL1 -4.16 dB  
PL1W 78.55633545 W  
SFO1 100.6198135 MHz

===== CHANNEL f2 =====  
CPDPRG[2] waltz16  
NUC2 1H  
PCPD2 80.00 usec  
PL2 -3.00 dB  
PL12 11.77 dB  
PL13 13.14 dB  
PL2W 16.03799057 W  
PL12W 0.53474891 W  
PL13W 0.39007664 W  
SFO2 400.1120007 MHz

F2 - Processing parameters  
SI 65536  
SF 100.6077400 MHz  
WDW EM  
SSB 0  
LB 1.00 Hz  
GB 0  
PC 1.40

Figure S5.  $^{13}\text{C}\{^1\text{H}\}$ -NMR spectrum of compound 2.

<sup>29</sup>Si-INEPTND-NMR of TbbGeX<sub>3</sub> in C<sub>6</sub>D<sub>6</sub> at rt

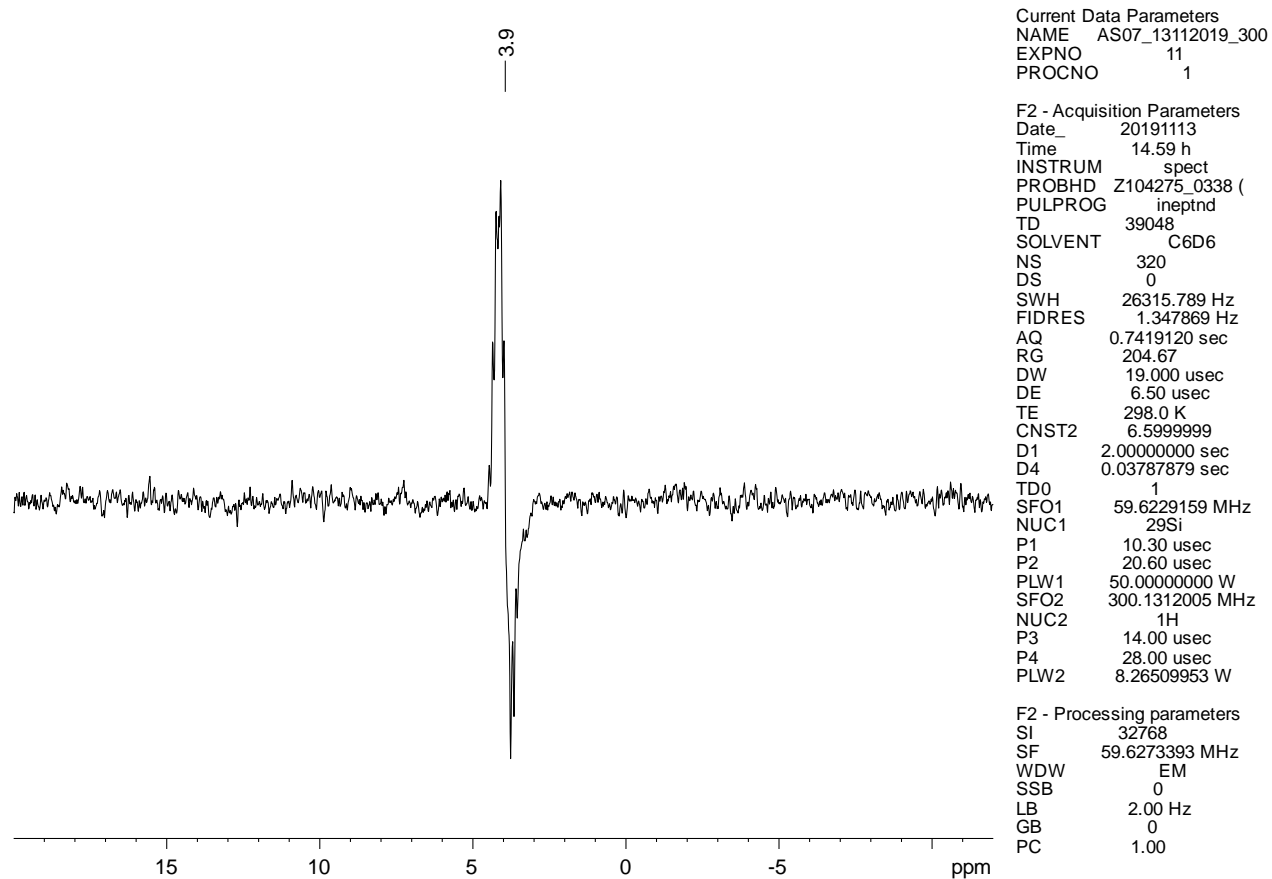

Figure S6. <sup>29</sup>Si-INEPTND-NMR spectrum of compound **2**.



# NMR spectra of compound 3

<sup>1</sup>H-NMR of TbbGeH<sub>3</sub> in C<sub>6</sub>D<sub>6</sub> (#) at rt

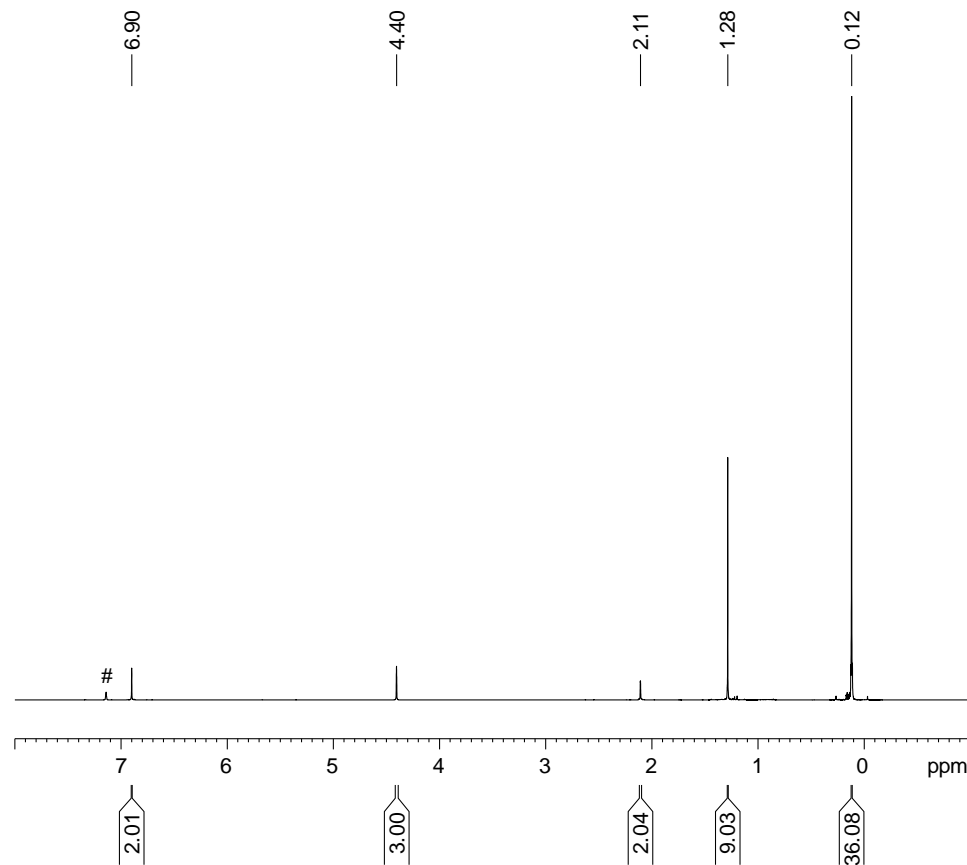

Current Data Parameters  
NAME MA179\_13112019\_400N  
EXPNO 10  
PROCNO 1

F2 - Acquisition Parameters  
Date\_ 20191113  
Time 20.05  
INSTRUM spect  
PROBHD 5 mm QNP 1H/13  
PULPROG zg30  
TD 52656  
SOLVENT C6D6  
NS 32  
DS 0  
SWH 8305.647 Hz  
FIDRES 0.157734 Hz  
AQ 3.1698911 sec  
RG 181  
DW 60.200 usec  
DE 6.00 usec  
TE 299.2 K  
D1 1.00000000 sec  
TD0 1

===== CHANNEL f1 =====  
NUC1 1H  
P1 14.60 usec  
PL1 -3.00 dB  
PL1W 16.03799057 W  
SFO1 400.1120007 MHz

F2 - Processing parameters  
SI 65536  
SF 400.1100000 MHz  
WDW EM  
SSB 0  
LB 0 Hz  
GB 0  
PC 1.00

Figure S7. <sup>1</sup>H-NMR spectrum of compound 3.

$^{13}\text{C}\{^1\text{H}\}$ -NMR of  $\text{TbbGeH}_3$  in  $\text{C}_6\text{D}_6$  (#) at rt

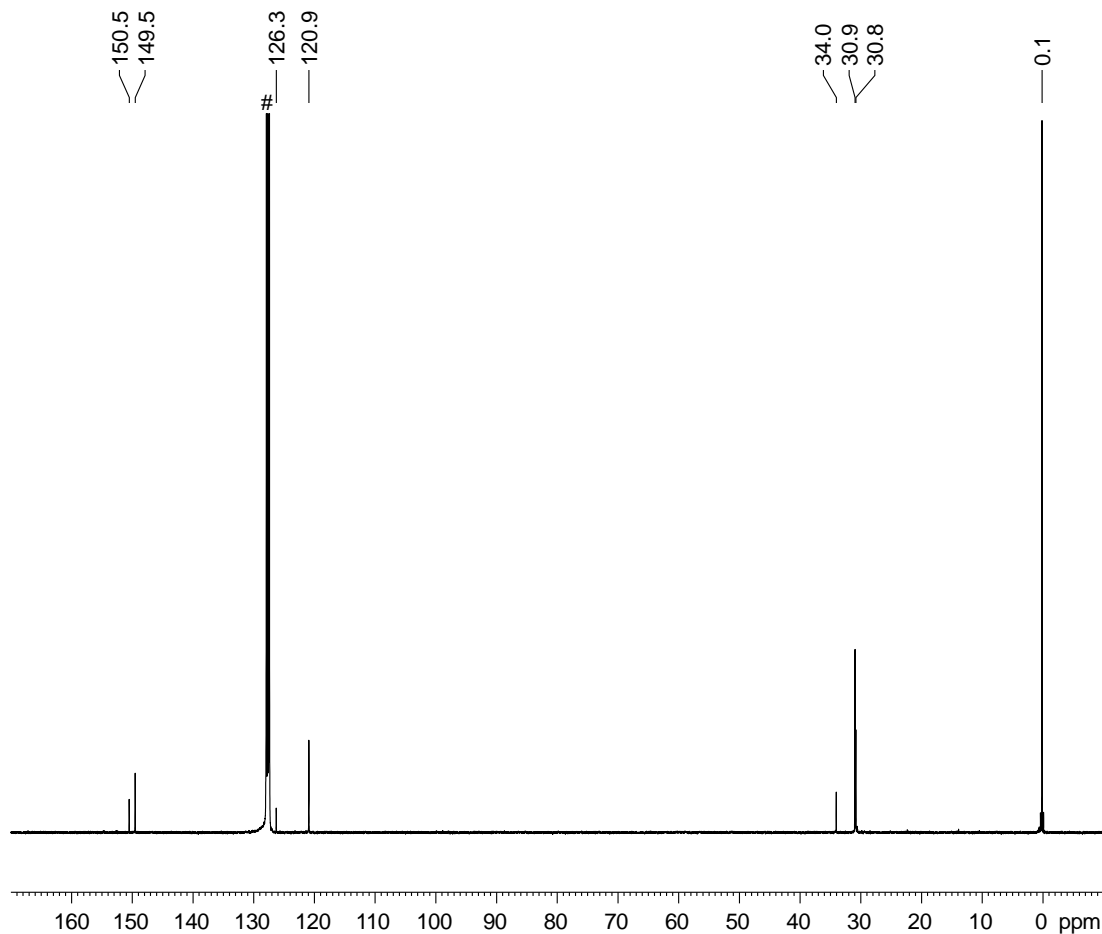

Current Data Parameters  
NAME MA179\_13112019\_400N  
EXPNO 11  
PROCNO 1

F2 - Acquisition Parameters  
Date\_ 20191114  
Time\_ 2.09  
INSTRUM spect  
PROBHD 5 mm QNP 1H/13  
PULPROG zgpg30  
TD 53700  
SOLVENT C6D6  
NS 11264  
DS 0  
SWH 30864.197 Hz  
FIDRES 0.574752 Hz  
AQ 0.8699400 sec  
RG 32800  
DW 16.200 usec  
DE 6.00 usec  
TE 299.2 K  
D1 1.0000000 sec  
D11 0.03000000 sec  
TD0 1

===== CHANNEL f1 =====

NUC1 13C  
P1 13.50 usec  
PL1 -4.16 dB  
PL1W 78.55633545 W  
SFO1 100.6198135 MHz

===== CHANNEL f2 =====

CPDPRG2 waltz16  
NUC2 1H  
PCPD2 80.00 usec  
PL2 -3.00 dB  
PL12 11.77 dB  
PL13 13.14 dB  
PL2W 16.03799057 W  
PL12W 0.53474891 W  
PL13W 0.39007664 W  
SFO2 400.1120007 MHz

F2 - Processing parameters  
SI 65536  
SF 100.6077400 MHz  
WDW EM  
SSB 0  
LB 1.00 Hz  
GB 0  
PC 1.40

Figure S8.  $^{13}\text{C}\{^1\text{H}\}$ -NMR spectrum of compound **3**.

$^{29}\text{Si}$ -INEPTND-NMR of  $\text{TbbGeH}_3$  in  $\text{C}_6\text{D}_6$  at rt

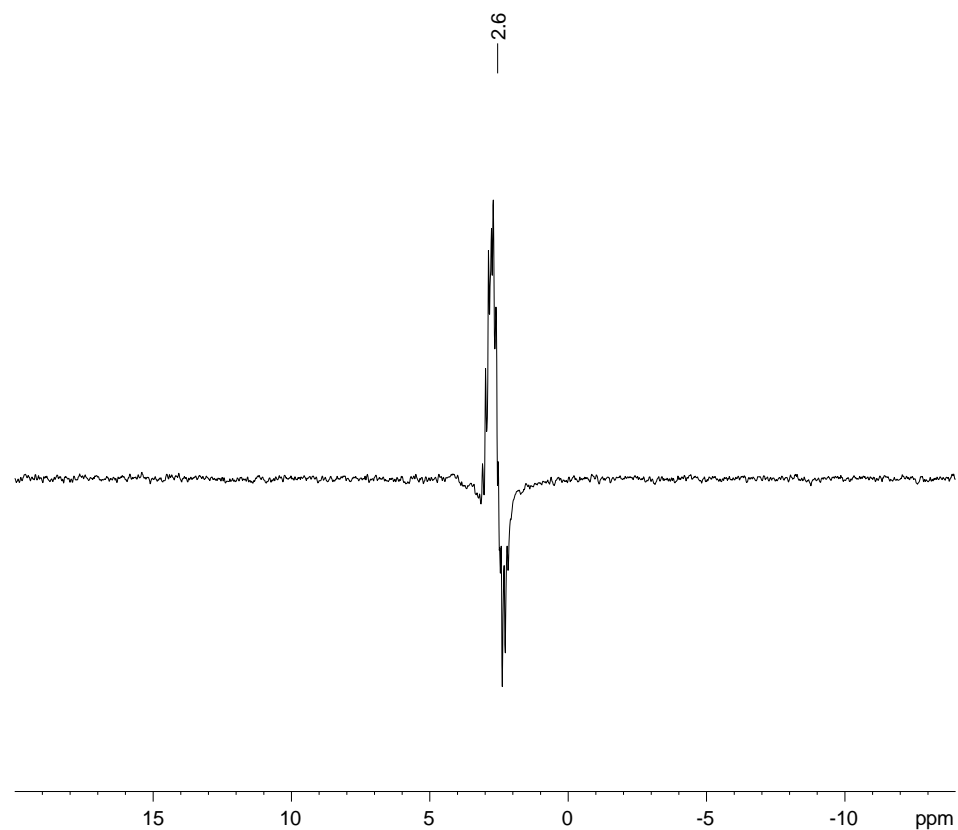

Current Data Parameters  
NAME MA179\_13112019\_300  
EXPNO 11  
PROCNO 1

F2 - Acquisition Parameters  
Date\_ 20191113  
Time 10.37 h  
INSTRUM spect  
PROBHD Z104275\_0338 (  
PULPROG ineptnd  
TD 39048  
SOLVENT C6D6  
NS 320  
DS 0  
SWH 26315.789 Hz  
FIDRES 1.347869 Hz  
AQ 0.7419120 sec  
RG 204.67  
DW 19.000 usec  
DE 6.50 usec  
TE 298.0 K  
CNST2 6.5999999  
D1 2.00000000 sec  
D4 0.03787879 sec  
TD0 1  
SFO1 59.6229159 MHz  
NUC1  $^{29}\text{Si}$   
P1 10.30 usec  
P2 20.60 usec  
PLW1 50.00000000 W  
SFO2 300.1312005 MHz  
NUC2  $^1\text{H}$   
P3 14.00 usec  
P4 28.00 usec  
PLW2 8.26509953 W

F2 - Processing parameters  
SI 32768  
SF 59.6273521 MHz  
WDW EM  
SSB 0  
LB 2.00 Hz  
GB 0  
PC 1.00

Figure S9.  $^{29}\text{Si}$ -INEPTND-NMR spectrum of compound **3**.

# NMR spectra of compound 4

<sup>1</sup>H-NMR of ([TbbSnBr<sub>2</sub>][Li{thf}<sub>2</sub>]) in C<sub>6</sub>D<sub>6</sub> (#) at rt, \*: *n*-hexane and unknown impurity

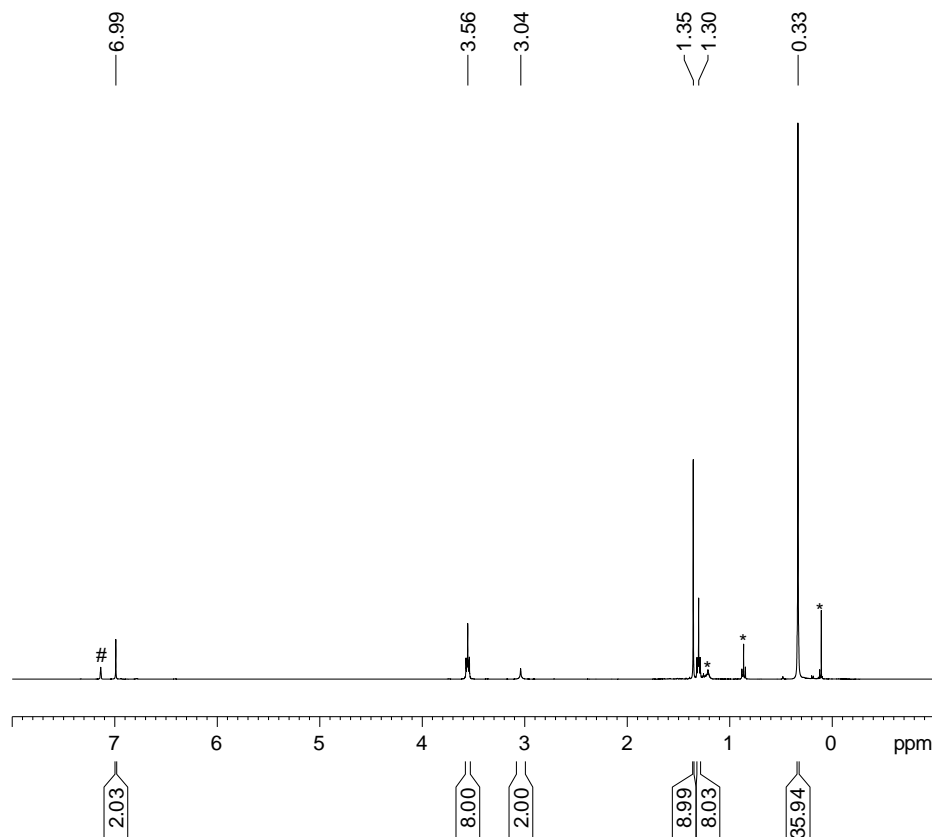

Current Data Parameters  
 NAME MA150K\_18102019\_400N  
 EXPNO 10  
 PROCNO 1

F2 - Acquisition Parameters  
 Date\_ 20191018  
 Time 20.05  
 INSTRUM spect  
 PROBHD 5 mm QNP 1H/13  
 PULPROG zg30  
 TD 52656  
 SOLVENT C6D6  
 NS 32  
 DS 0  
 SWH 8305.647 Hz  
 FIDRES 0.157734 Hz  
 AQ 3.1698911 sec  
 RG 161  
 DW 60.200 usec  
 DE 6.00 usec  
 TE 299.2 K  
 D1 1.00000000 sec  
 TD0 1

===== CHANNEL f1 =====  
 NUC1 1H  
 P1 14.60 usec  
 PL1 -3.00 dB  
 PL1W 16.03799057 W  
 SFO1 400.1120007 MHz

F2 - Processing parameters  
 SI 65536  
 SF 400.1100018 MHz  
 WDW EM  
 SSB 0  
 LB 0 Hz  
 GB 0  
 PC 1.00

Figure S10. <sup>1</sup>H-NMR spectrum of compound 4.

$^7\text{Li}$ -NMR of  $([\text{TbbSnBr}_2][\text{Li}(\text{thf})_2])$  in  $\text{C}_6\text{D}_6$  at rt

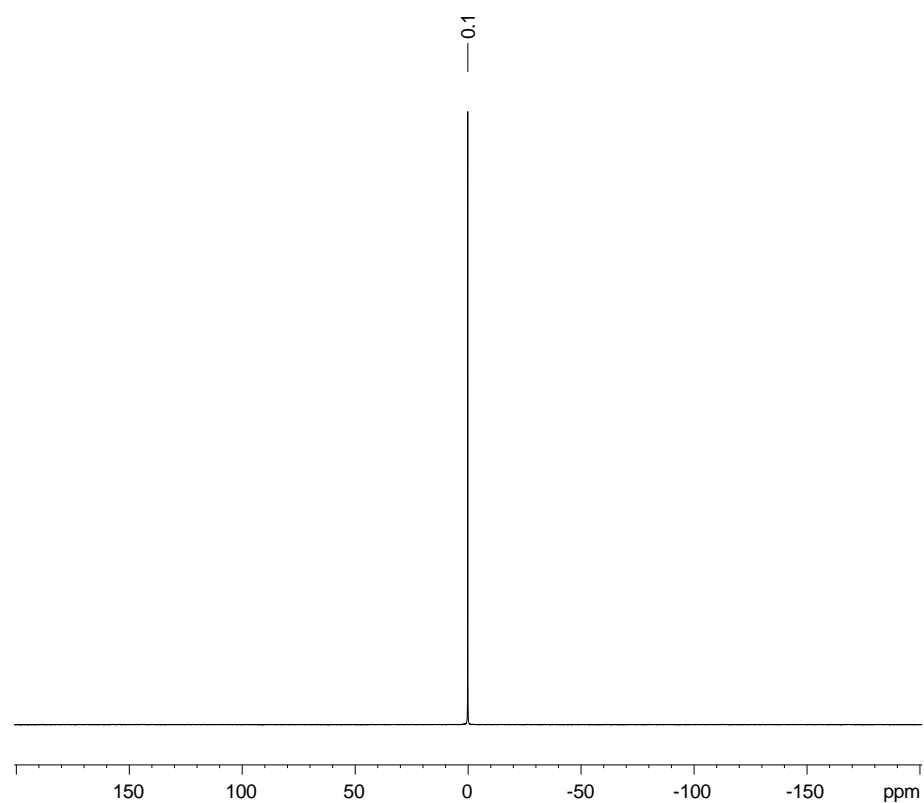

Current Data Parameters  
NAME MA150K\_18102019\_300  
EXPNO 11  
PROCNO 1

F2 - Acquisition Parameters  
Date\_ 20191018  
Time 10.49 h  
INSTRUM spect  
PROBHD Z104275\_0338 (  
PULPROG zg30  
TD 32050  
SOLVENT C6D6  
NS 256  
DS 0  
SWH 46875.000 Hz  
FIDRES 2.925117 Hz  
AQ 0.3418667 sec  
RG 204.67  
DW 10.667 usec  
DE 6.50 usec  
TE 298.0 K  
D1 0.20000000 sec  
TD0 1  
SFO1 116.6419139 MHz  
NUC1  $^7\text{Li}$   
P1 8.81 usec  
PLW1 34.00000000 W

F2 - Processing parameters  
SI 32768  
SF 116.6419139 MHz  
WDW EM  
SSB 0  
LB 5.00 Hz  
GB 0  
PC 1.40

Figure S11.  $^7\text{Li}$ -NMR spectrum of compound **4**.

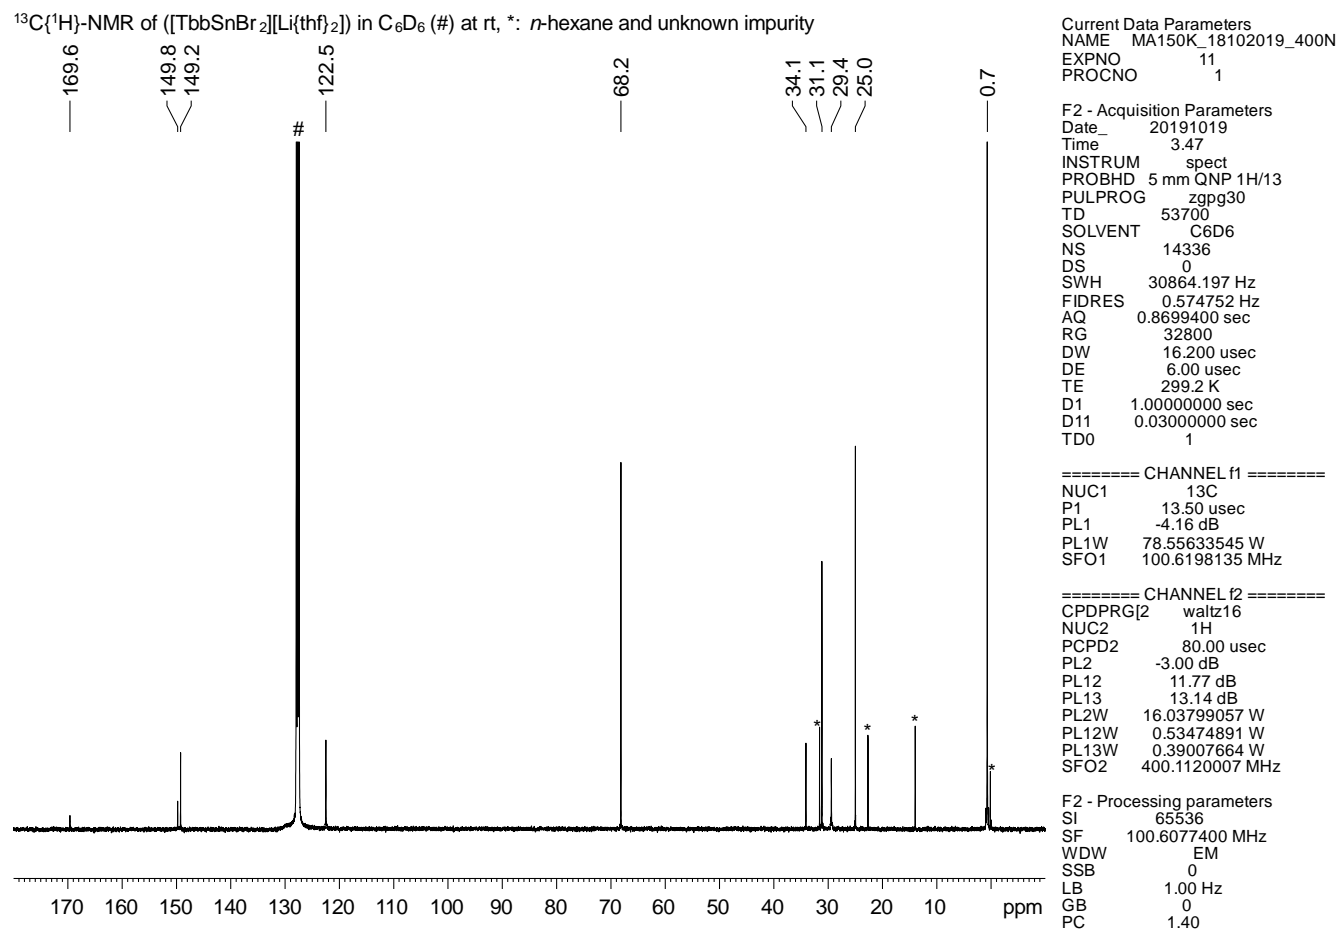

Figure S12.  $^{13}\text{C}\{^1\text{H}\}$ -NMR spectrum of compound **4**.

$^{29}\text{Si}$ -INEPTND-NMR of  $([\text{TbbSnBr}_2][\text{Li}(\text{thf})_2])$  in  $\text{C}_6\text{D}_6$  at rt

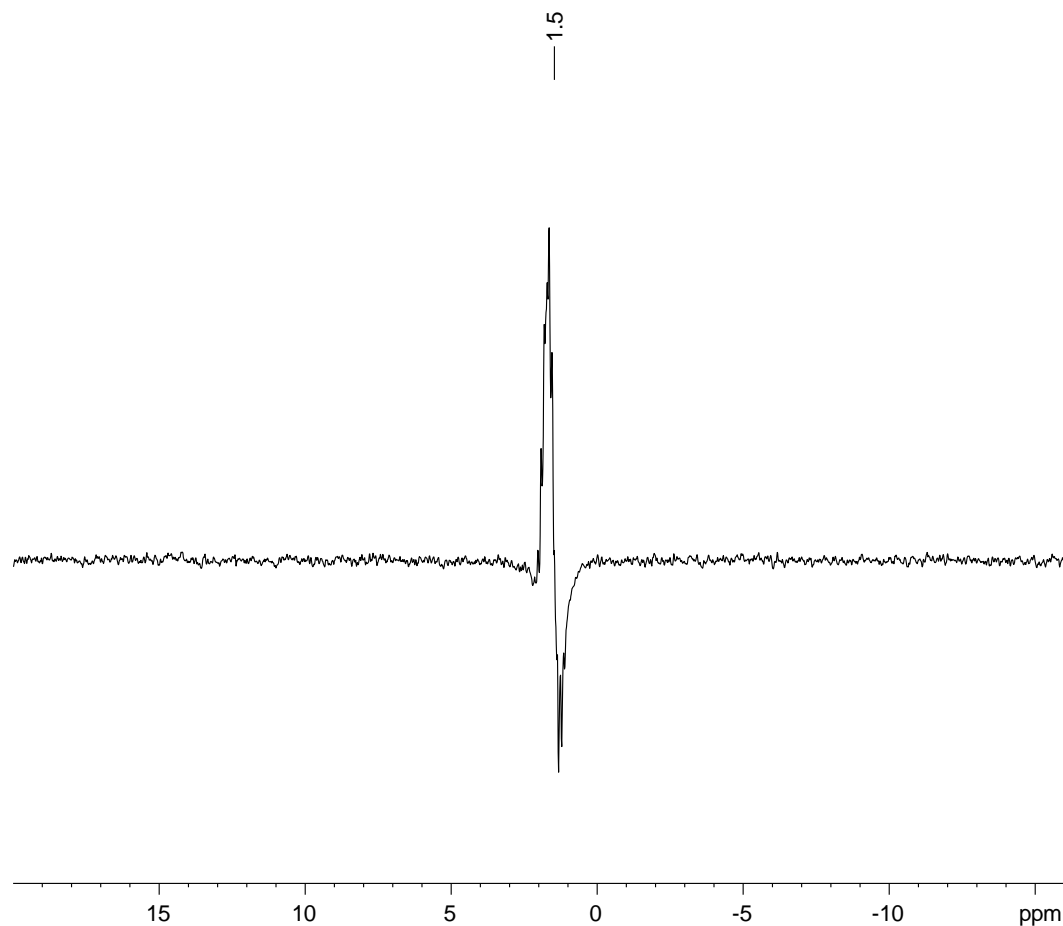

Current Data Parameters  
NAME MA150\_13112019\_300  
EXPNO 11  
PROCNO 1

F2 - Acquisition Parameters  
Date\_ 20191113  
Time 12.19 h  
INSTRUM spect  
PROBHD Z104275\_0338 (  
PULPROG ineptnd  
TD 39048  
SOLVENT C6D6  
NS 320  
DS 0  
SWH 26315.789 Hz  
FIDRES 1.347869 Hz  
AQ 0.7419120 sec  
RG 204.67  
DW 19.000 usec  
DE 6.50 usec  
TE 298.0 K  
CNST2 6.5999999  
D1 2.00000000 sec  
D4 0.03787879 sec  
TD0 1  
SFO1 59.6229159 MHz  
NUC1 29Si  
P1 10.30 usec  
P2 20.60 usec  
PLW1 50.00000000 W  
SFO2 300.1312005 MHz  
NUC2 1H  
P3 14.00 usec  
P4 28.00 usec  
PLW2 8.26509953 W

F2 - Processing parameters  
SI 32768  
SF 59.6273839 MHz  
WDW EM  
SSB 0  
LB 2.00 Hz  
GB 0  
PC 1.00

Figure S13.  $^{29}\text{Si}$ -INEPTND-NMR spectrum of compound 4.

$^{119}\text{Sn}$ -NMR of  $([\text{TbbSnBr}_2][\text{Li}(\text{thf})_2])$  in  $\text{C}_6\text{D}_6$  at rt

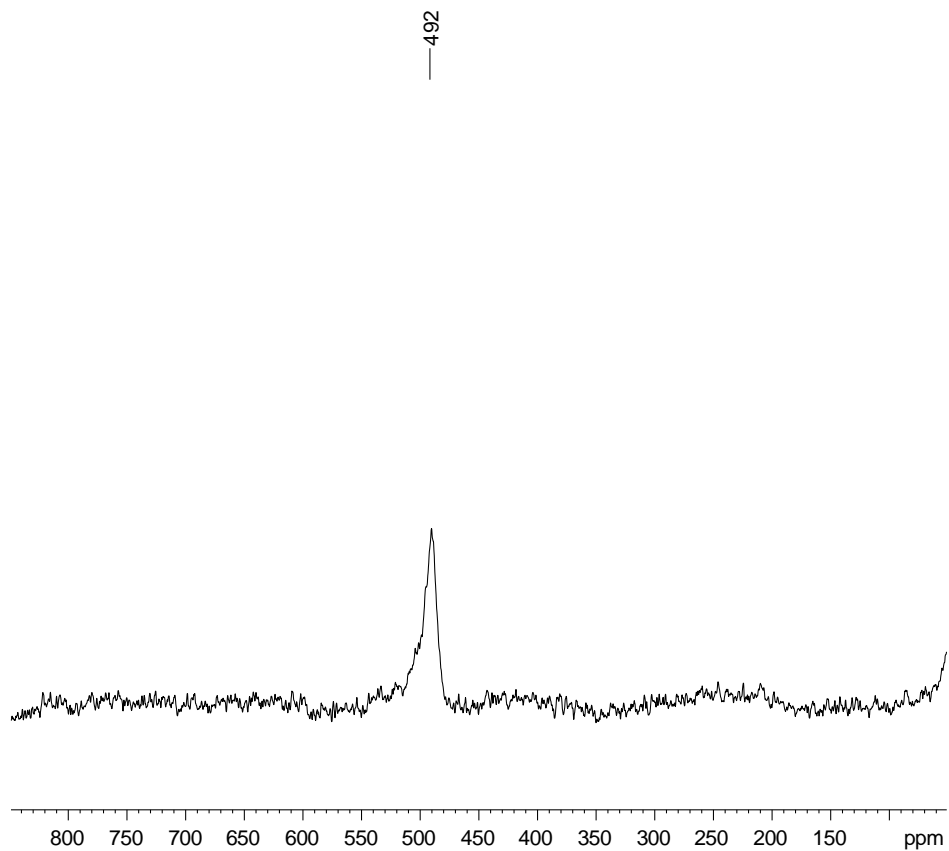

Current Data Parameters  
NAME MA150\_15102019\_300  
EXPNO 12  
PROCNO 1

F2 - Acquisition Parameters  
Date\_ 20191015  
Time 17.41 h  
INSTRUM spect  
PROBHD Z104275\_0338 (  
PULPROG zg30  
TD 4096  
SOLVENT C6D6  
NS 20480  
DS 1  
SWH 89285.711 Hz  
FIDRES 43.596539 Hz  
AQ 0.0229376 sec  
RG 204.67  
DW 5.600 usec  
DE 6.50 usec  
TE 298.0 K  
D1 0.02000000 sec  
TD0 1  
SFO1 111.9707380 MHz  
NUC1  $^{119}\text{Sn}$   
P1 12.10 usec  
PLW1 12.00000000 W

F2 - Processing parameters  
SI 4096  
SF 111.9203740 MHz  
WDW EM  
SSB 0  
LB 100.00 Hz  
GB 0  
PC 1.40

Figure S14.  $^{119}\text{Sn}$ -NMR spectrum of compound **4**.



# NMR spectra of compound 5

$^1\text{H-NMR}$  of  $([\text{TbbPbBr}_2][\text{Li}(\text{thf})_2])$  in  $\text{C}_6\text{D}_6$  (#) at rt, \*: *n*-pentane

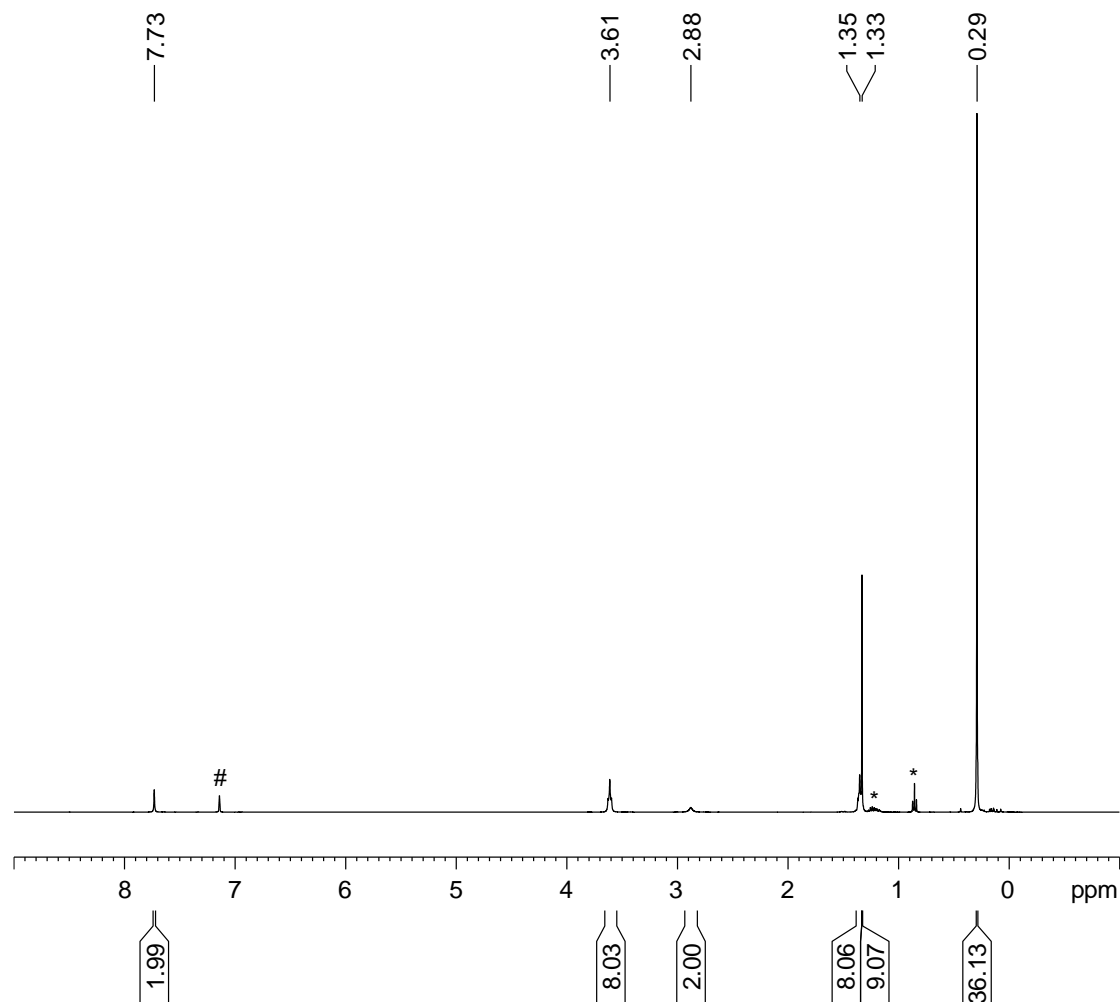

Current Data Parameters  
 NAME MA445K\_22122020\_400N  
 EXPNO 10  
 PROCNO 1

F2 - Acquisition Parameters  
 Date\_ 20201222  
 Time 15.16  
 INSTRUM spect  
 PROBHD 5 mm QNP 1H/13  
 PULPROG zg30  
 TD 52656  
 SOLVENT C6D6  
 NS 32  
 DS 0  
 SWH 8305.647 Hz  
 FIDRES 0.157734 Hz  
 AQ 3.1698911 sec  
 RG 161  
 DW 60.200 usec  
 DE 6.00 usec  
 TE 299.2 K  
 D1 1.00000000 sec  
 TD0 1

===== CHANNEL f1 =====  
 NUC1 1H  
 P1 14.60 usec  
 PL1 -3.00 dB  
 PL1W 16.03799057 W  
 SFO1 400.1120007 MHz

F2 - Processing parameters  
 SI 65536  
 SF 400.1100000 MHz  
 WDW EM  
 SSB 0  
 LB 0 Hz  
 GB 0  
 PC 1.00

Figure S15.  $^1\text{H-NMR}$  spectrum of compound 5.

$^7\text{Li}$ -NMR of  $([\text{TbbPbBr}_2][\text{Li}(\text{thf})_2])$  in  $\text{C}_6\text{D}_6$  at rt

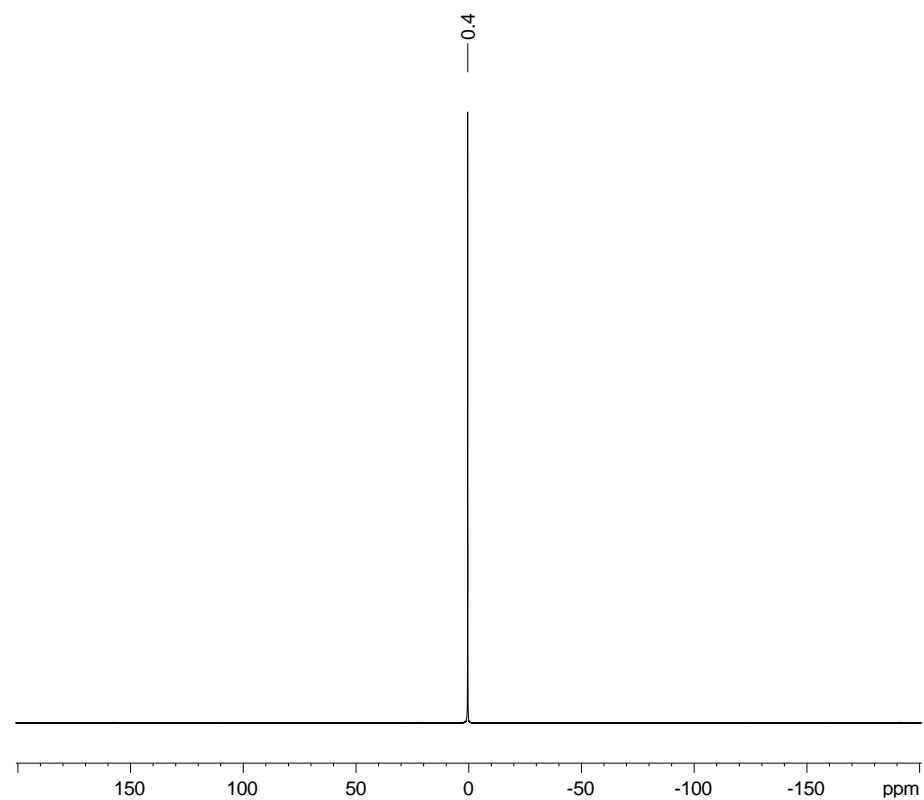

Current Data Parameters  
NAME MA445K\_25112020\_300  
EXPNO 11  
PROCNO 1

F2 - Acquisition Parameters  
Date\_ 20201125  
Time 9.55 h  
INSTRUM spect  
PROBHD Z104275\_0338 (  
PULPROG zg30  
TD 32050  
SOLVENT C6D6  
NS 256  
DS 0  
SWH 46875.000 Hz  
FIDRES 2.925117 Hz  
AQ 0.3418667 sec  
RG 204.67  
DW 10.667 usec  
DE 6.50 usec  
TE 298.0 K  
D1 0.20000000 sec  
TD0 1  
SFO1 116.6419139 MHz  
NUC1  $^7\text{Li}$   
P0 2.94 usec  
P1 8.81 usec  
PLW1 34.00000000 W

F2 - Processing parameters  
SI 32768  
SF 116.6419139 MHz  
WDW EM  
SSB 0  
LB 1.00 Hz  
GB 0  
PC 1.40

Figure S16.  $^7\text{Li}$ -NMR spectrum of compound 5.

$^{13}\text{C}\{^1\text{H}\}$ -NMR of  $([\text{TbbPbBr}_2][\text{Li}\{\text{thf}\}_2])$  in  $\text{C}_6\text{D}_6$  (#) at rt, \*: *n*-pentane

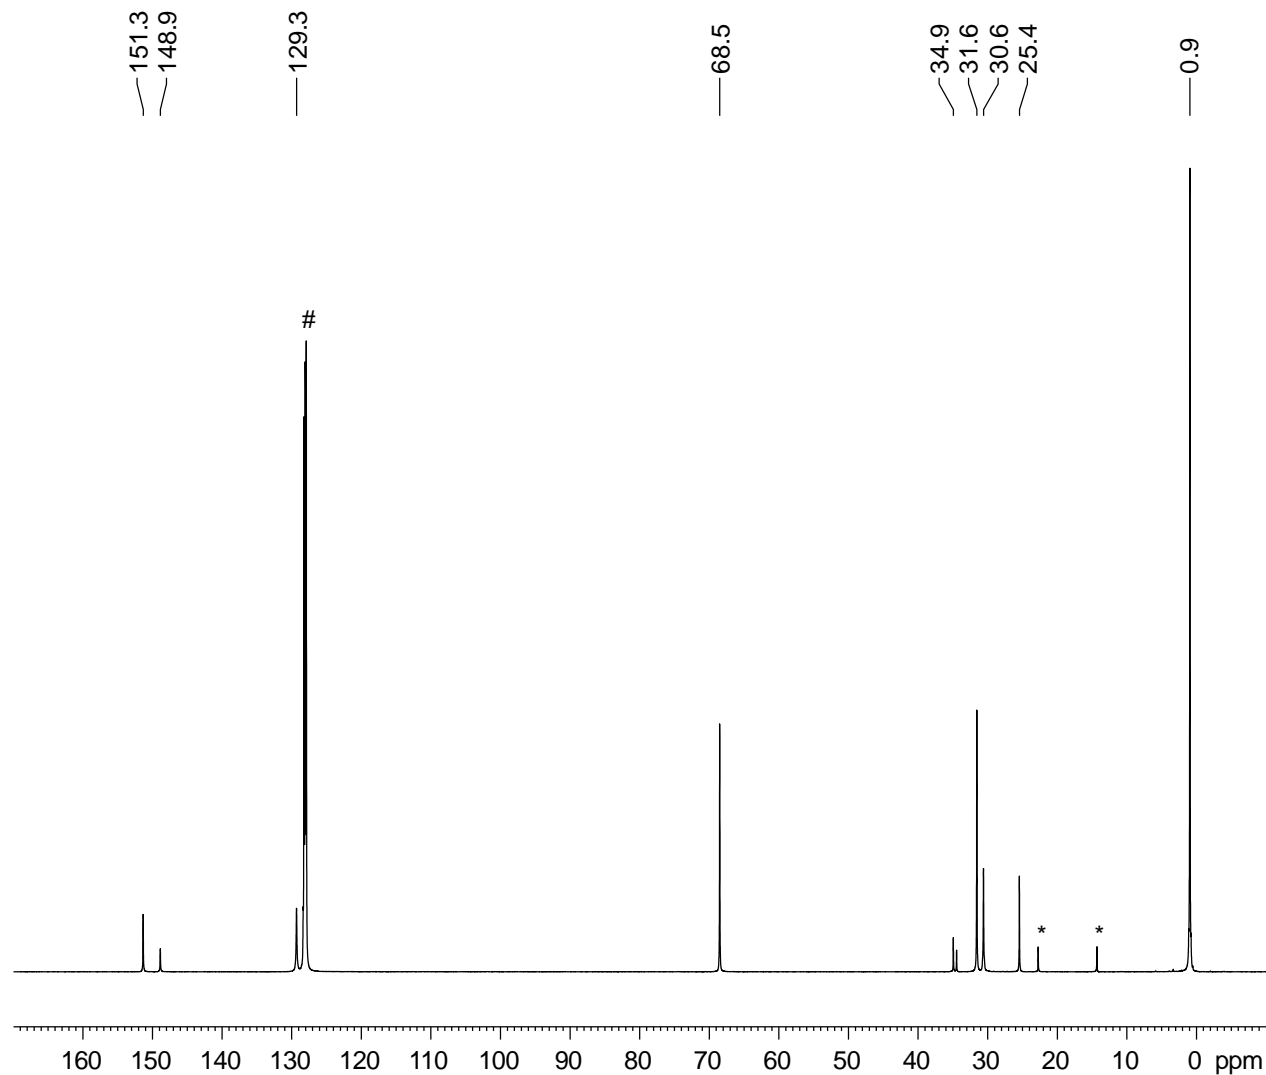

Current Data Parameters  
NAME MA714K\_30092021\_60  
EXPNO 11  
PROCNO 1

F2 - Acquisition Parameters  
Date\_ 20210930  
Time 20.06 h  
INSTRUM spect  
PROBHD Z126545\_0027 (  
PULPROG udef  
TD 32768  
SOLVENT C6D6  
NS 4096  
DS 0  
SWH 53571.430 Hz  
FIDRES 3.269741 Hz  
AQ 0.3058347 sec  
RG 189.6  
DW 9.333 usec  
DE 18.00 usec  
TE 298.0 K  
D1 4.00000000 sec  
D12 0.00002000 sec  
D20 20.00000000 sec  
TD0 1  
SFO1 150.9277075 MHz  
NUC1 13C  
P1 10.00 usec  
P13 2000.00 usec  
P26 500.00 usec  
PLW1 57.02700043 W  
SPNAM[5] Crp60comp.4  
SPOAL5 0.500  
SPOFFS5 0 Hz  
SPW5 8.71310043 W  
SPNAM[8] Crp60,0.5,20.1  
SPOAL8 0.500  
SPOFFS8 0 Hz  
SPW8 8.71310043 W  
SFO2 600.1324005 MHz  
NUC2 1H  
CPDPRG2 waltz16  
PCPD2 70.00 usec  
PLW2 23.41200066 W  
PLW12 0.68803000 W

F2 - Processing parameters  
SI 131072  
SF 150.9027510 MHz  
WDW EM  
SSB 0  
LB 7.00 Hz  
GB 0  
PC 1.40

Figure S17.  $^{13}\text{C}\{^1\text{H}\}$ -NMR spectrum of compound **5**.

$^{13}\text{C}\{^1\text{H}\}$ -NMR of  $([\text{TbbPbBr}_2][\text{Li}\{\text{thf}\}_2])$  in  $\text{C}_6\text{D}_6$  (#) at rt, \*: *n*-pentane

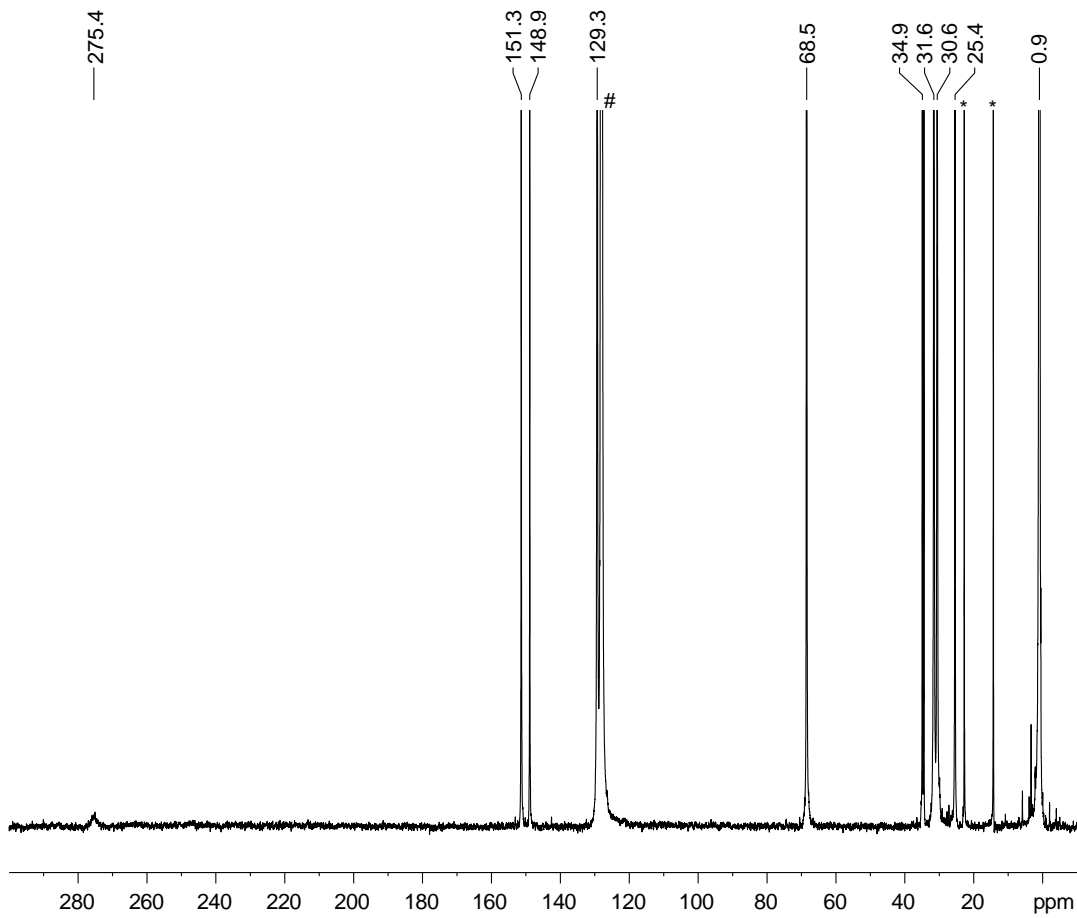

Current Data Parameters  
NAME MA714K\_30092021\_600  
EXPNO 11  
PROCNO 1

F2 - Acquisition Parameters  
Date\_ 20210930  
Time 20.06 h  
INSTRUM spect  
PROBHD Z126545\_0027 (  
PULPROG udef  
TD 32768  
SOLVENT C6D6  
NS 4096  
DS 0  
SWH 53571.430 Hz  
FIDRES 3.269741 Hz  
AQ 0.3058347 sec  
RG 189.6  
DW 9.333 usec  
DE 18.00 usec  
TE 298.0 K  
D1 4.00000000 sec  
D12 0.00002000 sec  
D20 20.00000000 sec  
TD0 1  
SFO1 150.9277075 MHz  
NUC1 13C  
P1 10.00 usec  
P13 2000.00 usec  
P26 500.00 usec  
PLW1 57.02700043 W  
SPNAM[5] Crp60comp.4  
SPOAL5 0.500  
SPOFFS5 0 Hz  
SPW5 8.71310043 W  
SPNAM[8] Crp60,0.5,20.1  
SPOAL8 0.500  
SPOFFS8 0 Hz  
SPW8 8.71310043 W  
SFO2 600.1324005 MHz  
NUC2 1H  
CPDPRG[2] waltz16  
PCPD2 70.00 usec  
PLW2 23.41200066 W  
PLW12 0.68803000 W

F2 - Processing parameters  
SI 131072  
SF 150.9027510 MHz  
WDW EM  
SSB 0  
LB 7.00 Hz  
GB 0  
PC 1.40

Figure S18.  $^{13}\text{C}\{^1\text{H}\}$ -NMR spectrum of compound 5.

$^{29}\text{Si}$ -INEPTND-NMR of  $([\text{TbbPbBr}_2][\text{Li}(\text{thf})_2])$  in  $\text{C}_6\text{D}_6$  at rt

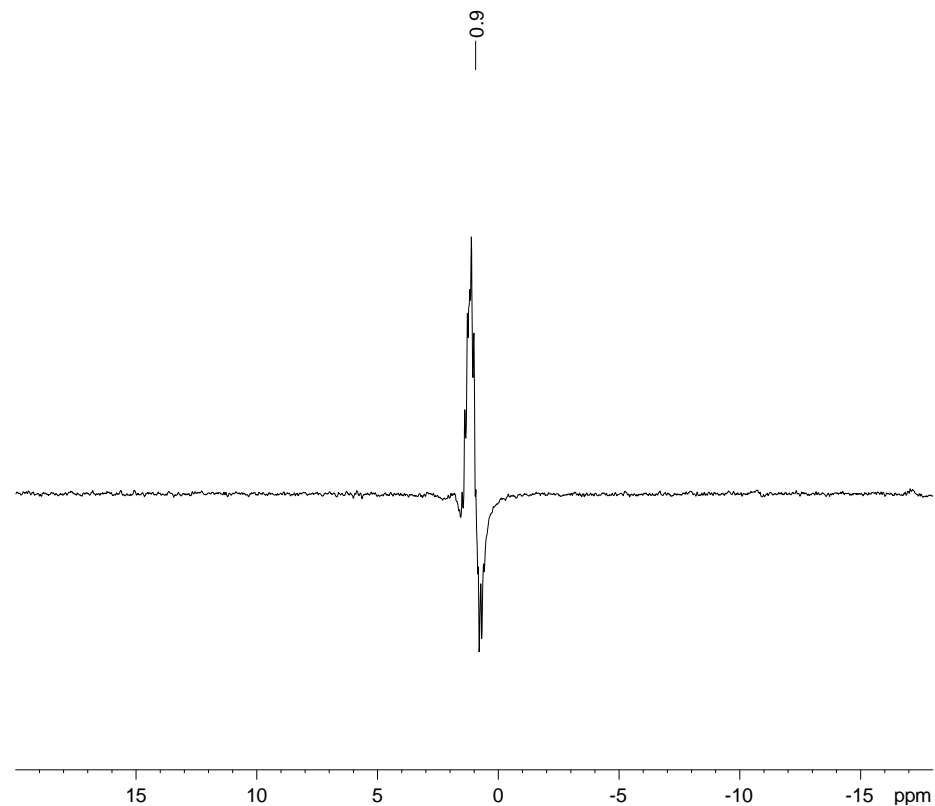

Current Data Parameters  
NAME MA445K\_24112020\_300  
EXPNO 11  
PROCNO 1

F2 - Acquisition Parameters  
Date\_ 20201124  
Time 9.58 h  
INSTRUM spect  
PROBHD Z104275\_0338 (  
PULPROG ineptnd  
TD 39048  
SOLVENT C6D6  
NS 320  
DS 0  
SWH 26315.789 Hz  
FIDRES 1.347869 Hz  
AQ 0.7419120 sec  
RG 204.67  
DW 19.000 usec  
DE 6.50 usec  
TE 298.0 K  
CNST2 6.5999999  
D1 2.0000000 sec  
D4 0.03787879 sec  
TD0 1  
SFO1 59.6229159 MHz  
NUC1 29Si  
P1 10.30 usec  
P2 20.60 usec  
PLW1 50.00000000 W  
SFO2 300.1312005 MHz  
NUC2 1H  
P3 14.00 usec  
P4 28.00 usec  
PLW2 8.26509953 W

F2 - Processing parameters  
SI 32768  
SF 59.6273582 MHz  
WDW EM  
SSB 0  
LB 2.00 Hz  
GB 0  
PC 1.00

Figure S19.  $^{29}\text{Si}$ -INEPTND-NMR spectrum of compound **5**.

$^{207}\text{Pb}$ -NMR of  $([\text{TbbPbBr}_2][\text{Li}(\text{thf})_2])$  in  $\text{C}_6\text{D}_6$  at rt

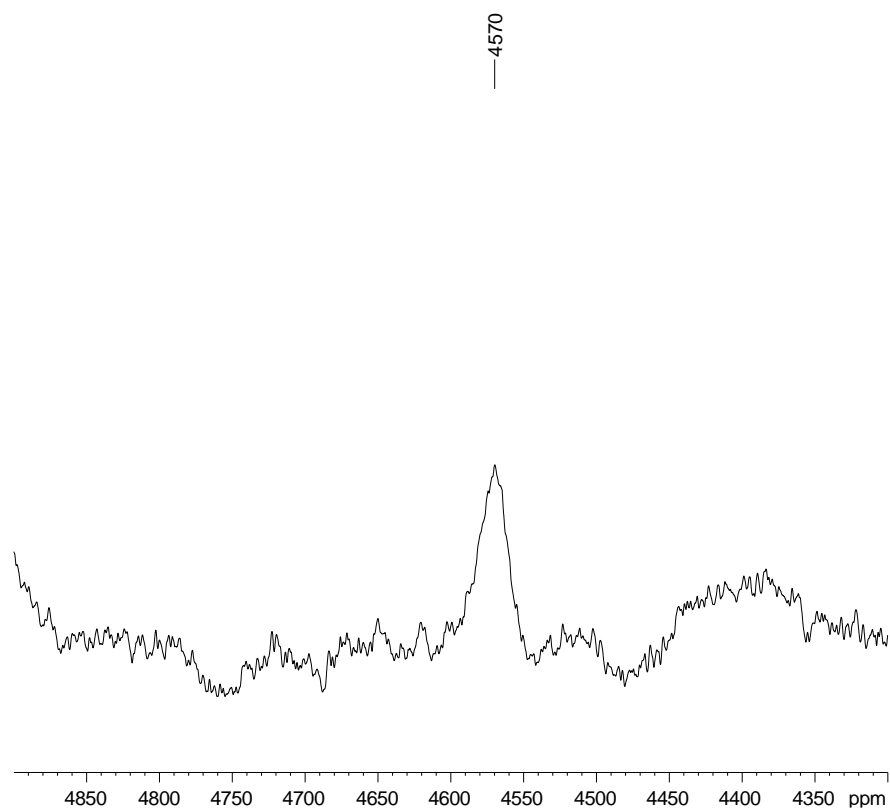

Current Data Parameters  
NAME MA445K\_01032021\_300N  
EXPNO 18  
PROCNO 1

F2 - Acquisition Parameters  
Date\_ 20210301  
Time 21.08 h  
INSTRUM spect  
PROBHD Z104275\_0338 (  
PULPROG zg30  
TD 14998  
SOLVENT C6D6  
NS 128000  
DS 0  
SWH 125000.000 Hz  
FIDRES 16.668890 Hz  
AQ 0.0599920 sec  
RG 204.67  
DW 4.000 usec  
DE 10.00 usec  
TE 298.0 K  
D1 0.20000000 sec  
TD0 1  
SFO1 63.0401498 MHz  
NUC1 207Pb  
P0 4.17 usec  
P1 12.50 usec  
PLW1 40.00000000 W

F2 - Processing parameters  
SI 65536  
SF 62.7889938 MHz  
WDW EM  
SSB 0  
LB 100.00 Hz  
GB 0  
PC 3.00

Figure S20.  $^{207}\text{Pb}$ -NMR spectrum of compound **5**.

# NMR spectra of compound 6

$^1\text{H-NMR}$  of  $\text{TbSnBr}_3$  in  $\text{C}_6\text{D}_6$  (#) at rt

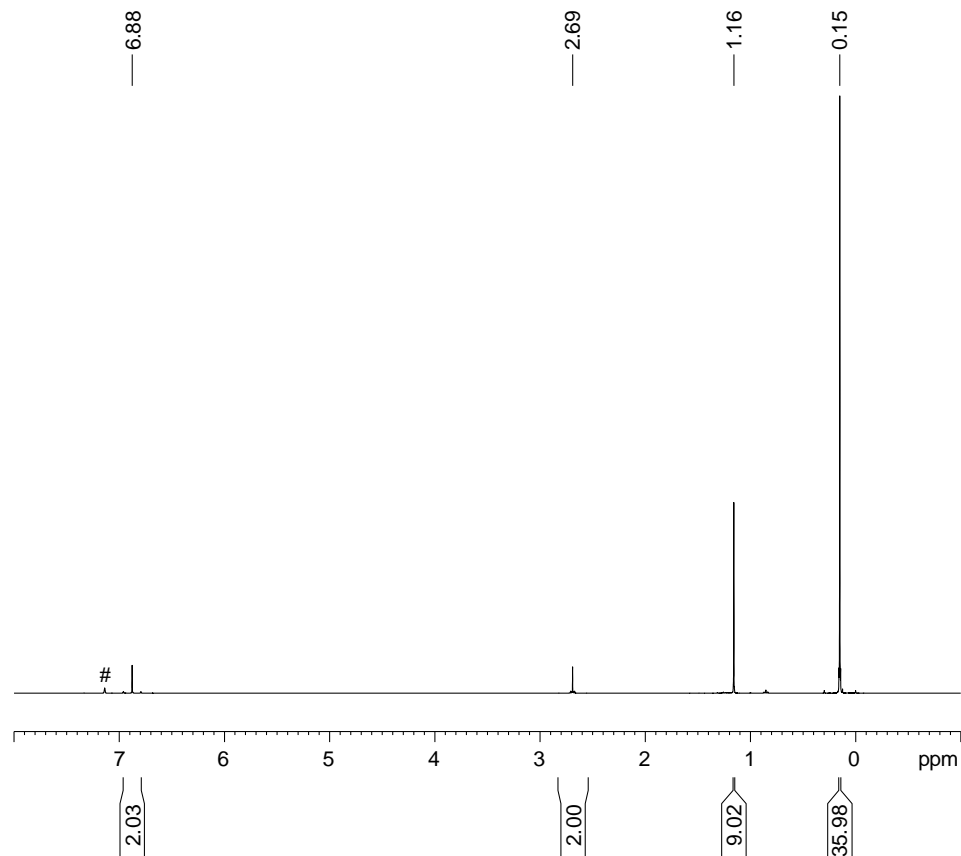

Current Data Parameters  
NAME MA164\_31102019\_400N  
EXPNO 10  
PROCNO 1

F2 - Acquisition Parameters  
Date\_ 20191031  
Time 21.12  
INSTRUM spect  
PROBHD 5 mm QNP 1H/13  
PULPROG zg30  
TD 52656  
SOLVENT C6D6  
NS 32  
DS 0  
SWH 8305.647 Hz  
FIDRES 0.157734 Hz  
AQ 3.1698911 sec  
RG 128  
DW 60.200 usec  
DE 6.00 usec  
TE 299.2 K  
D1 1.00000000 sec  
TD0 1

===== CHANNEL f1 =====  
NUC1 1H  
P1 14.60 usec  
PL1 -3.00 dB  
PL1W 16.03799057 W  
SFO1 400.1120007 MHz

F2 - Processing parameters  
SI 65536  
SF 400.1100010 MHz  
WDW EM  
SSB 0  
LB 0 Hz  
GB 0  
PC 1.00

Figure S21.  $^1\text{H-NMR}$  spectrum of compound 6.

$^{13}\text{C}\{^1\text{H}\}$ -NMR of  $\text{TbbSnBr}_3$  in  $\text{C}_6\text{D}_6$  (#) at rt, \*: *n*-pentane

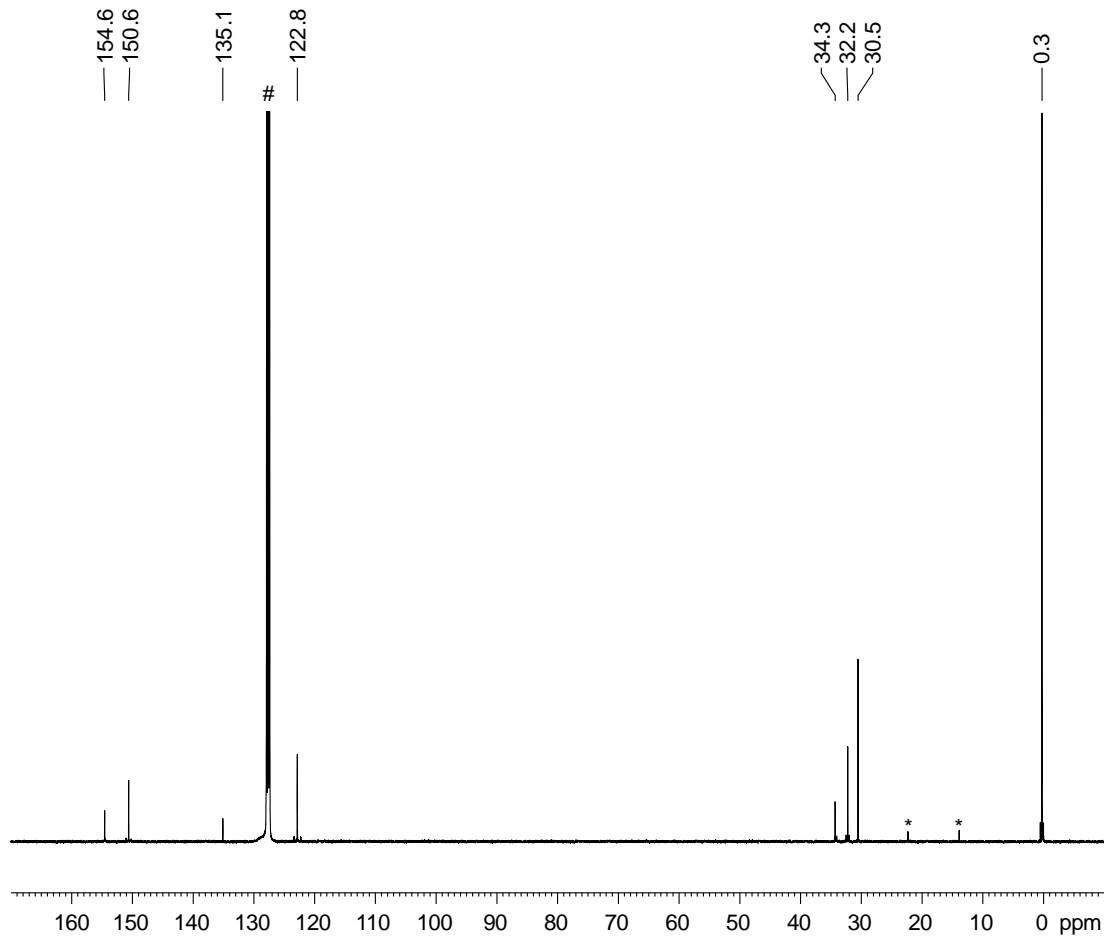

Current Data Parameters  
NAME MA164\_31102019\_400N  
EXPNO 11  
PROCNO 1

F2 - Acquisition Parameters  
Date\_ 20191101  
Time 2.10  
INSTRUM spect  
PROBHD 5 mm QNP 1H/13  
PULPROG zgpg30  
TD 53700  
SOLVENT C6D6  
NS 9216  
DS 0  
SWH 30864.197 Hz  
FIDRES 0.574752 Hz  
AQ 0.8699400 sec  
RG 32800  
DW 16.200 usec  
DE 6.00 usec  
TE 299.2 K  
D1 1.00000000 sec  
D11 0.03000000 sec  
TD0 1

===== CHANNEL f1 =====  
NUC1 13C  
P1 13.50 usec  
PL1 -4.16 dB  
PL1W 78.55633545 W  
SFO1 100.6198135 MHz

===== CHANNEL f2 =====  
CPDPRG[2] waltz16  
NUC2 1H  
PCPD2 80.00 usec  
PL2 -3.00 dB  
PL12 11.77 dB  
PL13 13.14 dB  
PL2W 16.03799057 W  
PL12W 0.53474891 W  
PL13W 0.39007664 W  
SFO2 400.1120007 MHz

F2 - Processing parameters  
SI 65536  
SF 100.6077417 MHz  
WDW EM  
SSB 0  
LB 1.00 Hz  
GB 0  
PC 1.40

Figure S22.  $^{13}\text{C}\{^1\text{H}\}$ -NMR spectrum of compound **6**.



$^{29}\text{Si}$ -INEPTND-NMR of  $\text{TbSnBr}_3$  in  $\text{C}_6\text{D}_6$  at rt

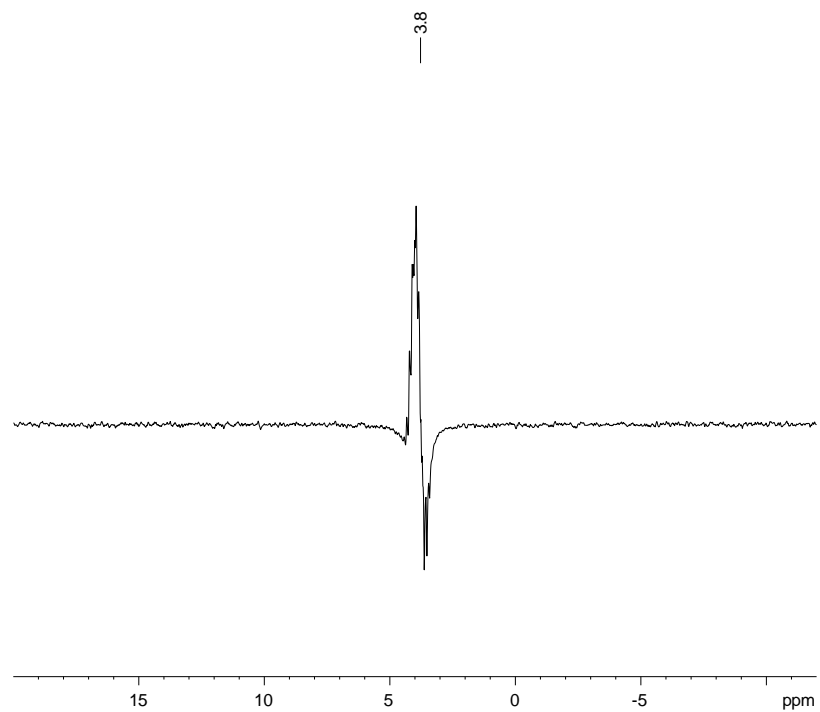

Current Data Parameters  
NAME MA164\_13112019\_300  
EXPNO 11  
PROCNO 1

F2 - Acquisition Parameters  
Date\_ 20191113  
Time 11.35 h  
INSTRUM spect  
PROBHD Z104275\_0338 (  
PULPROG ineptnd  
TD 39048  
SOLVENT C6D6  
NS 320  
DS 0  
SWH 26315.789 Hz  
FIDRES 1.347869 Hz  
AQ 0.7419120 sec  
RG 204.67  
DW 19.000 usec  
DE 6.50 usec  
TE 298.0 K  
CNST2 6.5999999  
D1 2.00000000 sec  
D4 0.03787879 sec  
TD0 1  
SFO1 59.6229159 MHz  
NUC1 29Si  
P1 10.30 usec  
P2 20.60 usec  
PLW1 50.00000000 W  
SFO2 300.1312005 MHz  
NUC2 1H  
P3 14.00 usec  
P4 28.00 usec  
PLW2 8.26509953 W

F2 - Processing parameters  
SI 32768  
SF 59.6273498 MHz  
WDW EM  
SSB 0  
LB 2.00 Hz  
GB 0  
PC 1.00

Figure S23.  $^{29}\text{Si}$ -INEPTND-NMR spectrum of compound **6**.

$^{119}\text{Sn}$ -NMR of  $\text{TbbSnBr}_3$  in  $\text{C}_6\text{D}_6$  at rt

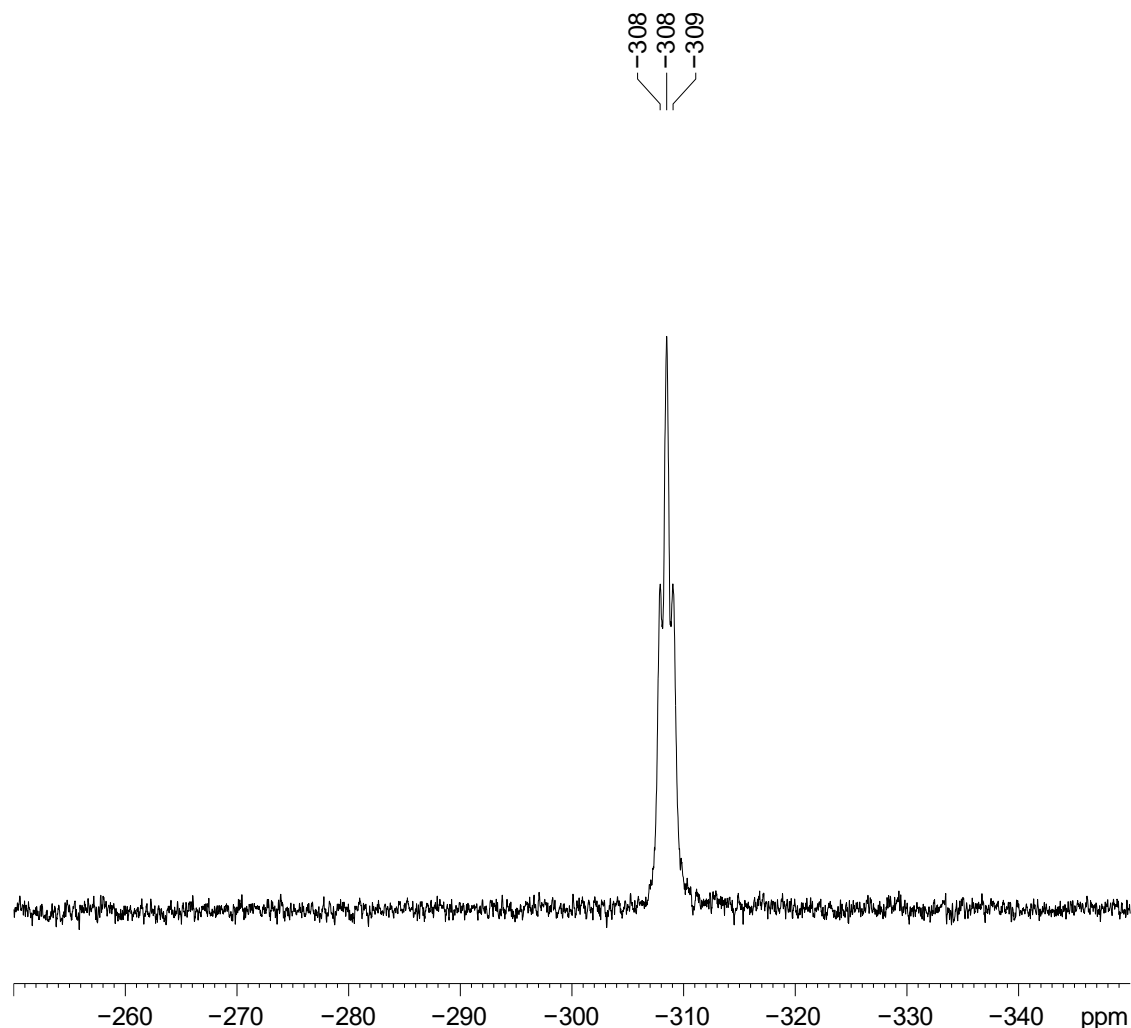

Current Data Parameters  
NAME MA164\_30102019\_300N  
EXPNO 17  
PROCNO 1

F2 - Acquisition Parameters  
Date\_ 20191030  
Time 21.02 h  
INSTRUM spect  
PROBHD Z104275\_0338 (  
PULPROG zg30  
TD 89276  
SOLVENT C6D6  
NS 73728  
DS 1  
SWH 89285.711 Hz  
FIDRES 2.000218 Hz  
AQ 0.4999456 sec  
RG 204.67  
DW 5.600 usec  
DE 6.50 usec  
TE 298.0 K  
D1 0.02000000 sec  
TD0 1  
SFO1 111.8979900 MHz  
NUC1  $^{119}\text{Sn}$   
P1 12.10 usec  
PLW1 12.00000000 W

F2 - Processing parameters  
SI 65536  
SF 111.9203740 MHz  
WDW EM  
SSB 0  
LB 5.00 Hz  
GB 0  
PC 1.40

Figure S24.  $^{119}\text{Sn}$ -NMR spectrum of compound **6**.

$^{119}\text{Sn}\{^1\text{H}\}$ -NMR of  $\text{TbbSnBr}_3$  in  $\text{C}_6\text{D}_6$  at rt

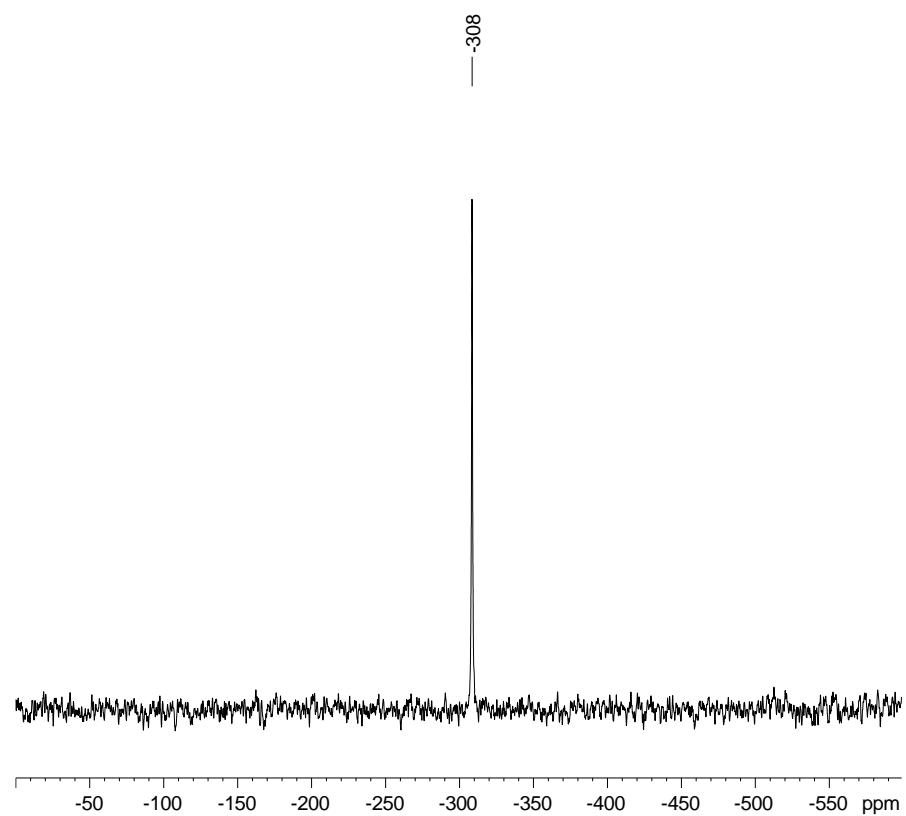

Current Data Parameters  
NAME MA164K\_25112019\_300  
EXPNO 11  
PROCNO 1

F2 - Acquisition Parameters  
Date\_ 20191125  
Time 11.37 h  
INSTRUM spect  
PROBHD Z104275\_0338 (  
PULPROG zgig30  
TD 39186  
SOLVENT C6D6  
NS 4900  
DS 4  
SWH 89285.711 Hz  
FIDRES 4.557021 Hz  
AQ 0.2194416 sec  
RG 204.67  
DW 5.600 usec  
DE 6.50 usec  
TE 298.0 K  
D1 0.10000000 sec  
D11 0.03000000 sec  
TD0 1  
SFO1 111.8979898 MHz  
NUC1  $^{119}\text{Sn}$   
P1 12.10 usec  
PLW1 12.00000000 W  
SFO2 300.1312005 MHz  
NUC2  $^1\text{H}$   
CPDPRG[2] waltz16  
PCPD2 90.00 usec  
PLW2 8.26509953 W  
PLW12 0.20000000 W

F2 - Processing parameters  
SI 65536  
SF 111.9203738 MHz  
WDW EM  
SSB 0  
LB 50.00 Hz  
GB 0  
PC 1.40

Figure S25.  $^{119}\text{Sn}\{^1\text{H}\}$ -NMR spectrum of compound **6**.

# NMR spectra of compound 7

$^1\text{H-NMR}$  of  $\text{TbbSnH}_3$  in  $\text{C}_6\text{D}_6$  (#) at rt

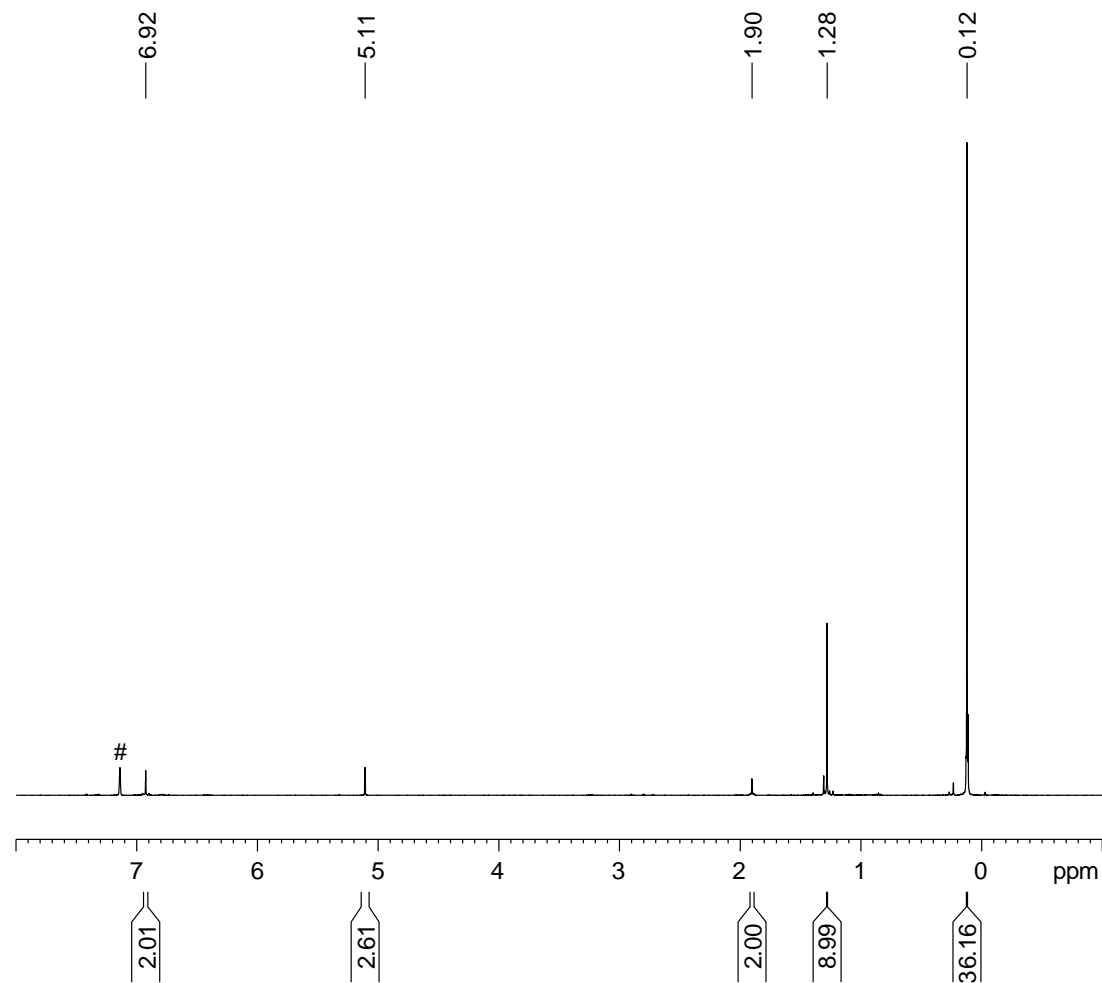

Current Data Parameters  
NAME MA232\_10022020\_400N  
EXPNO 10  
PROCNO 1

F2 - Acquisition Parameters  
Date\_ 20200210  
Time\_ 20.06  
INSTRUM spect  
PROBHD 5 mm QNP 1H/13  
PULPROG zg30  
TD 52656  
SOLVENT C6D6  
NS 32  
DS 0  
SWH 8305.647 Hz  
FIDRES 0.157734 Hz  
AQ 3.1698911 sec  
RG 322  
DW 60.200 usec  
DE 6.00 usec  
TE 299.2 K  
D1 1.00000000 sec  
TD0 1

==== CHANNEL f1 =====  
NUC1 1H  
P1 14.60 usec  
PL1 -3.00 dB  
PL1W 16.03799057 W  
SFO1 400.1120007 MHz

F2 - Processing parameters  
SI 65536  
SF 400.1100000 MHz  
WDW EM  
SSB 0  
LB 0 Hz  
GB 0  
PC 1.00

Figure S26.  $^1\text{H}$  NMR spectrum of compound 7.

$^{13}\text{C}\{^1\text{H}\}$ -NMR of  $\text{Tb}(\text{SnH}_3)$  in  $\text{C}_6\text{D}_6$  (#) at rt

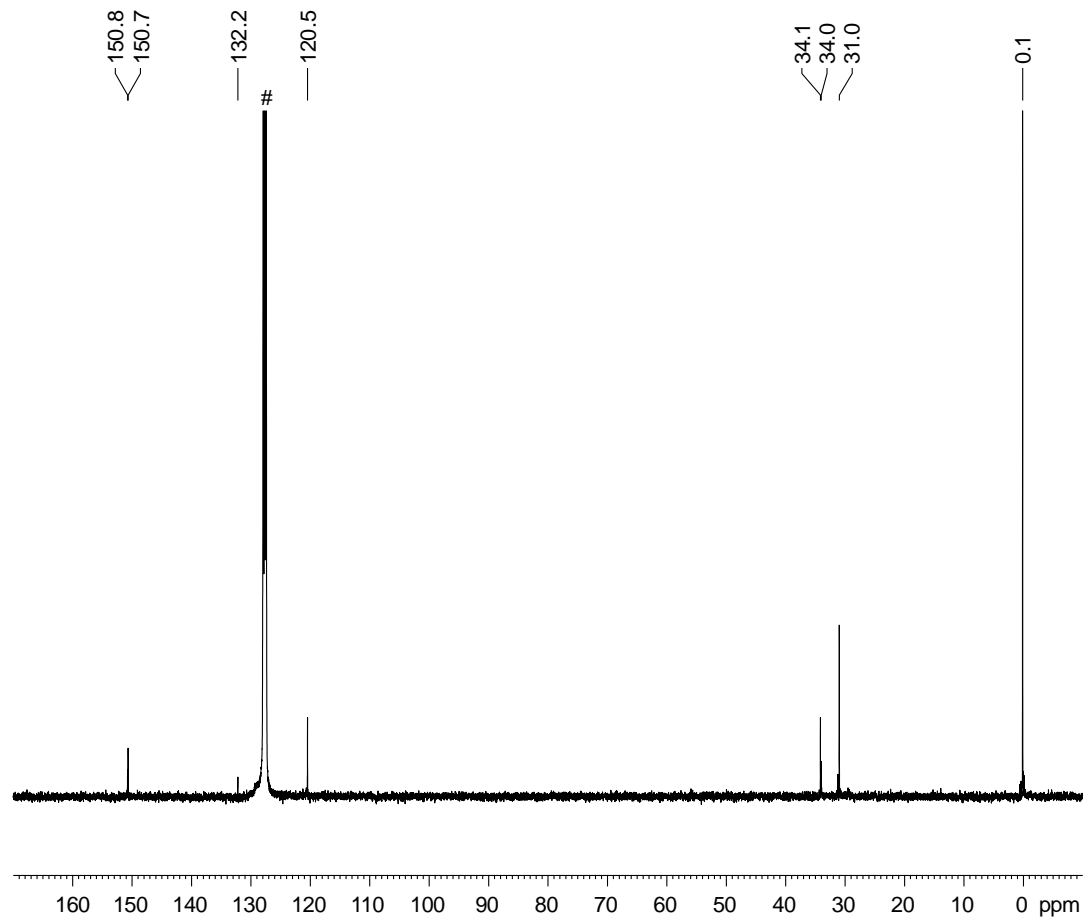

Current Data Parameters  
NAME MA232\_10022020\_400N  
EXPNO 11  
PROCNO 1

F2 - Acquisition Parameters  
Date\_ 20200211  
Time 2.09  
INSTRUM spect  
PROBHD 5 mm QNP 1H/13  
PULPROG zgpg30  
TD 53700  
SOLVENT C6D6  
NS 11264  
DS 0  
SWH 30864.197 Hz  
FIDRES 0.574752 Hz  
AQ 0.8699400 sec  
RG 32800  
DW 16.200 usec  
DE 6.00 usec  
TE 299.2 K  
D1 1.00000000 sec  
D11 0.03000000 sec  
TD0 1

==== CHANNEL f1 =====  
NUC1 13C  
P1 13.50 usec  
PL1 -4.16 dB  
PL1W 78.55633545 W  
SFO1 100.6198135 MHz

==== CHANNEL f2 =====  
CPDPRG2 waltz16  
NUC2 1H  
PCPD2 80.00 usec  
PL2 -3.00 dB  
PL12 11.77 dB  
PL13 13.14 dB  
PL2W 16.03799057 W  
PL12W 0.53474891 W  
PL13W 0.39007664 W  
SFO2 400.1120007 MHz

F2 - Processing parameters  
SI 65536  
SF 100.6077400 MHz  
WDW EM  
SSB 0  
LB 1.00 Hz  
GB 0  
PC 1.40

Figure S27.  $^{13}\text{C}\{^1\text{H}\}$ -NMR spectrum of compound 7.

$^{29}\text{Si}$ -INEPTND-NMR of  $\text{TbSnH}_3$  in toluene- $d_8$  at rt

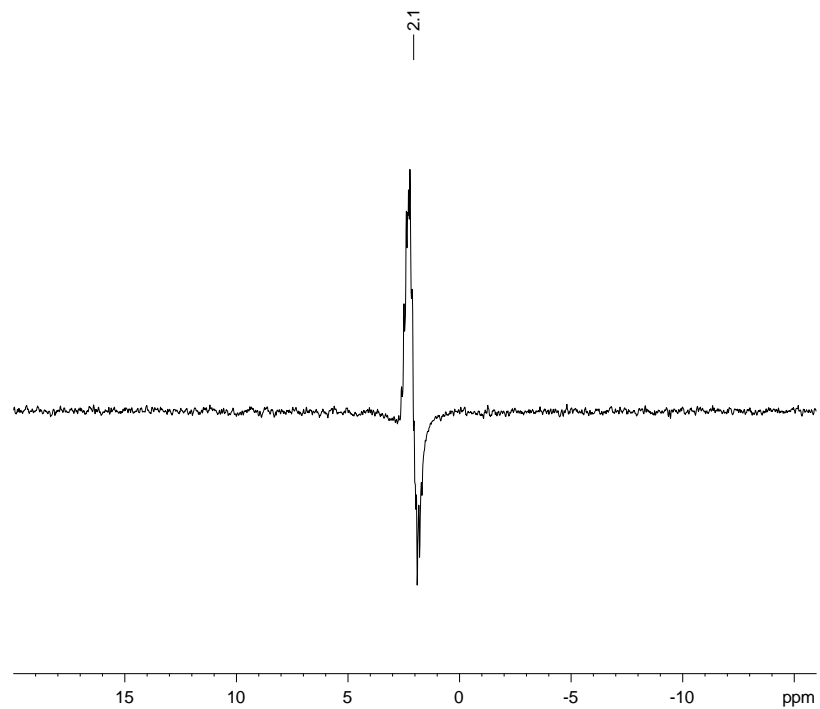

Current Data Parameters  
NAME MA192\_28112019\_300  
EXPNO 11  
PROCNO 1

F2 - Acquisition Parameters  
Date\_ 20191128  
Time 15.20 h  
INSTRUM spect  
PROBHD Z104275\_0338 (  
PULPROG ineptnd  
TD 39048  
SOLVENT Tol  
NS 320  
DS 0  
SWH 26315.789 Hz  
FIDRES 1.347869 Hz  
AQ 0.7419120 sec  
RG 204.67  
DW 19.000 usec  
DE 6.50 usec  
TE 298.0 K  
CNST2 6.5999999  
D1 2.00000000 sec  
D4 0.03787879 sec  
TD0 1  
SFO1 59.6229159 MHz  
NUC1  $^{29}\text{Si}$   
P1 10.30 usec  
P2 20.60 usec  
PLW1 50.00000000 W  
SFO2 300.1312005 MHz  
NUC2  $^1\text{H}$   
P3 14.00 usec  
P4 28.00 usec  
PLW2 8.26509953 W

F2 - Processing parameters  
SI 32768  
SF 59.6273880 MHz  
WDW EM  
SSB 0  
LB 2.00 Hz  
GB 0  
PC 1.00

Figure S28.  $^{29}\text{Si}$ -INEPTND-NMR spectrum of compound **7**.

$^{119}\text{Sn}$ -NMR of  $\text{TbbSnH}_3$  in toluene- $d_8$  at rt

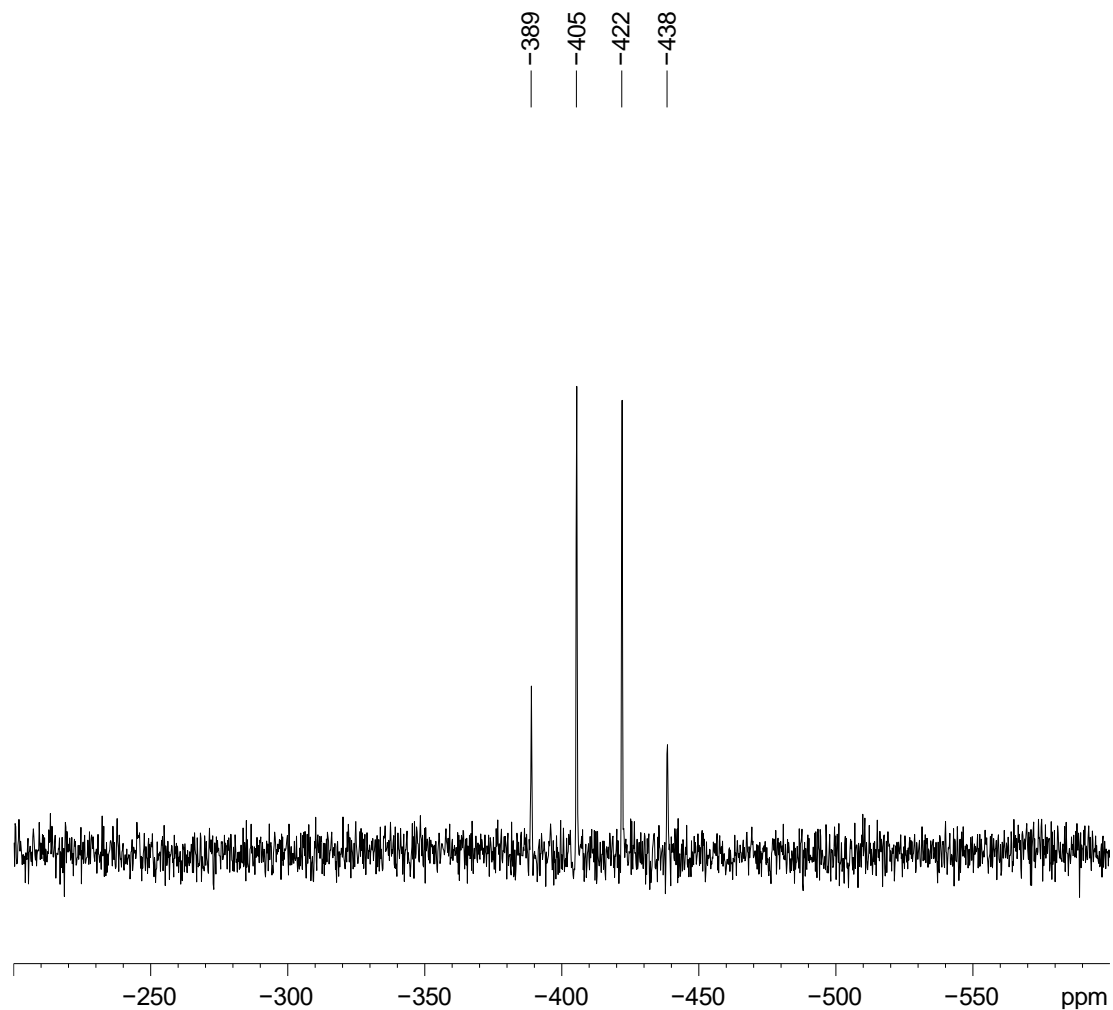

Current Data Parameters  
NAME MA192\_28112019\_300  
EXPNO 12  
PROCNO 1

F2 - Acquisition Parameters  
Date\_ 20191128  
Time 15.55 h  
INSTRUM spect  
PROBHD Z104275\_0338 (  
PULPROG zg30  
TD 8918  
SOLVENT Tol  
NS 17408  
DS 1  
SWH 89285.711 Hz  
FIDRES 20.023708 Hz  
AQ 0.0499408 sec  
RG 204.67  
DW 5.600 usec  
DE 6.50 usec  
TE 298.0 K  
D1 0.02000000 sec  
TD0 1  
SFO1 111.8867979 MHz  
NUC1  $^{119}\text{Sn}$   
P1 12.10 usec  
PLW1 12.00000000 W

F2 - Processing parameters  
SI 4096  
SF 111.9203740 MHz  
WDW EM  
SSB 0  
LB 0 Hz  
GB 0  
PC 1.40

Figure S29.  $^{119}\text{Sn}$ -NMR spectrum of compound **7**.

$^{119}\text{Sn}\{^1\text{H}\}$ -NMR of  $\text{TbbSnH}_3$  in toluene- $d_8$  at rt

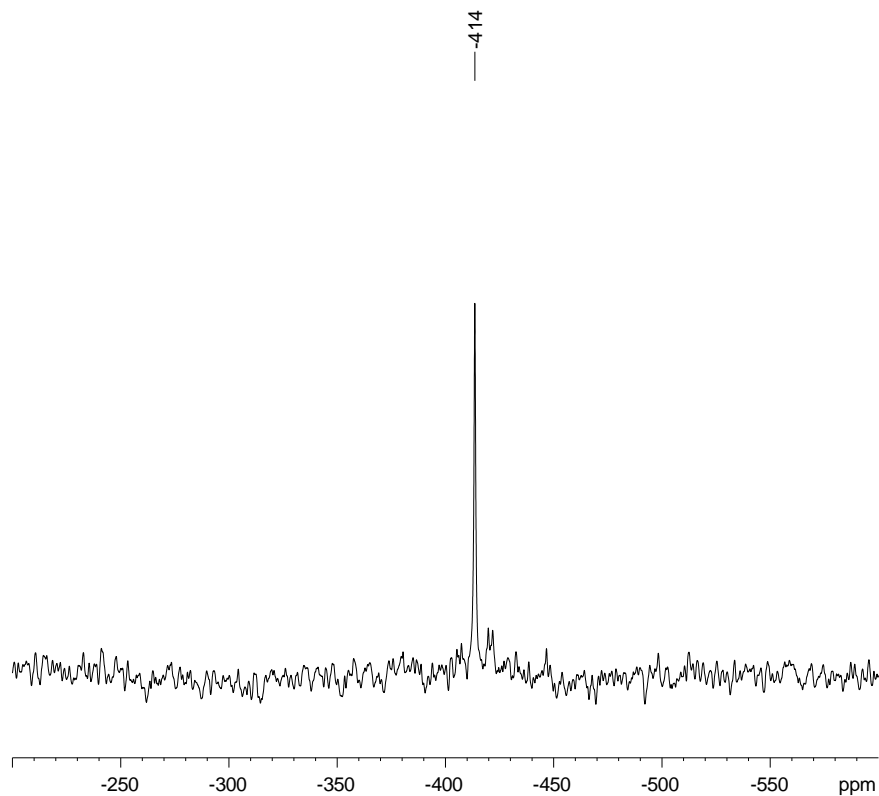

Current Data Parameters  
NAME MA192\_28112019\_300  
EXPNO 13  
PROCNO 1

F2 - Acquisition Parameters  
Date\_ 20191128  
Time 20.17 h  
INSTRUM spect  
PROBHD Z104275\_0338 (  
PULPROG zgig30  
TD 39186  
SOLVENT Tol  
NS 5100  
DS 4  
SWH 89285.711 Hz  
FIDRES 4.557021 Hz  
AQ 0.2194416 sec  
RG 204.67  
DW 5.600 usec  
DE 6.50 usec  
TE 298.0 K  
D1 0.10000000 sec  
D11 0.03000000 sec  
TD0 1  
SFO1 111.8867977 MHz  
NUC1  $^{119}\text{Sn}$   
P1 12.10 usec  
PLW1 12.00000000 W  
SFO2 300.1312005 MHz  
NUC2  $^1\text{H}$   
CPDPRG[2] waltz16  
PCPD2 90.00 usec  
PLW2 8.26509953 W  
PLW12 0.20000000 W

F2 - Processing parameters  
SI 65536  
SF 111.9203738 MHz  
WDW EM  
SSB 0  
LB 50.00 Hz  
GB 0  
PC 1.40

Figure S30.  $^{119}\text{Sn}\{^1\text{H}\}$ -NMR spectrum of compound **7**.



# NMR spectra of compound **8**

$^1\text{H-NMR}$  of  $([\text{TbGeH}_2][\text{Li}(\text{thf})_{1.5}]_2)$  in  $\text{C}_6\text{D}_6$  (#) at rt

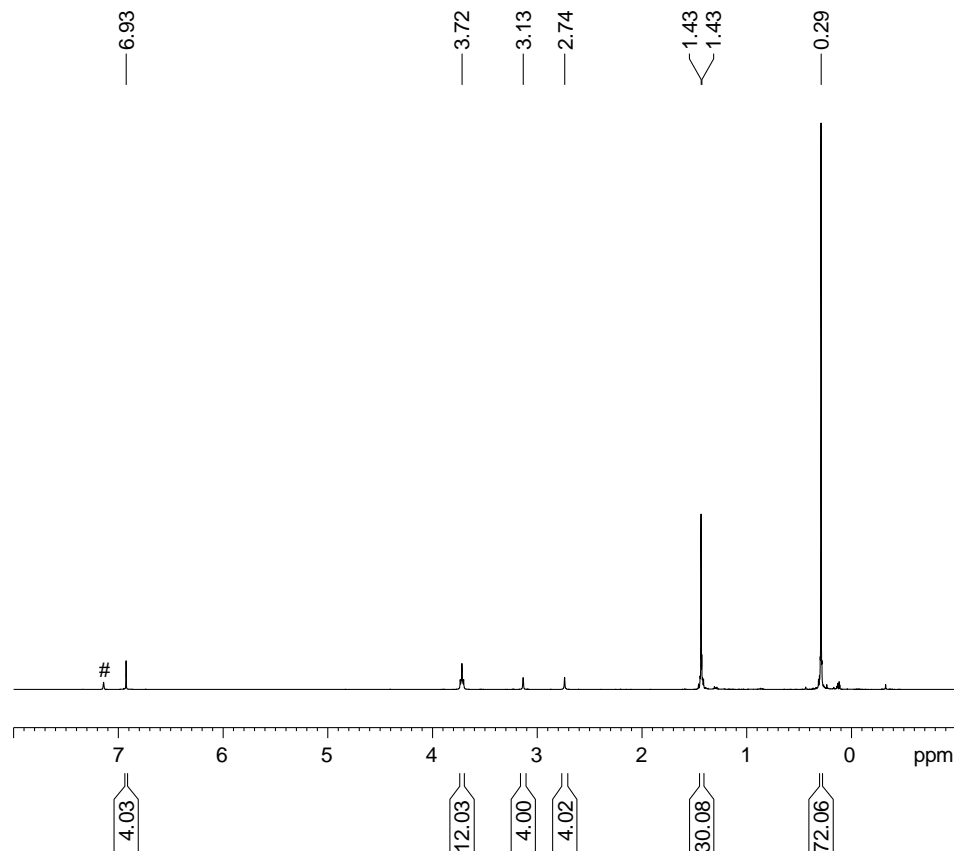

Current Data Parameters  
 NAME MA197\_11122019\_400N  
 EXPNO 10  
 PROCNO 1

F2 - Acquisition Parameters  
 Date\_ 20191211  
 Time 20.06  
 INSTRUM spect  
 PROBHD 5 mm QNP 1H/13  
 PULPROG zg30  
 TD 52656  
 SOLVENT C6D6  
 NS 32  
 DS 0  
 SWH 8305.647 Hz  
 FIDRES 0.157734 Hz  
 AQ 3.1698911 sec  
 RG 144  
 DW 60.200 usec  
 DE 6.00 usec  
 TE 299.2 K  
 D1 1.00000000 sec  
 TD0 1

===== CHANNEL f1 =====  
 NUC1 1H  
 P1 14.60 usec  
 PL1 -3.00 dB  
 PL1W 16.03799057 W  
 SFO1 400.1120007 MHz

F2 - Processing parameters  
 SI 65536  
 SF 400.1100000 MHz  
 WDW EM  
 SSB 0  
 LB 0 Hz  
 GB 0  
 PC 1.00

Figure S31.  $^1\text{H-NMR}$  spectrum of compound **8**.

$^7\text{Li}$ -NMR of  $(\text{TbbGeH}_2)[\text{Li}(\text{thf})_{1.5}]_2$  in  $\text{C}_6\text{D}_6$  at rt

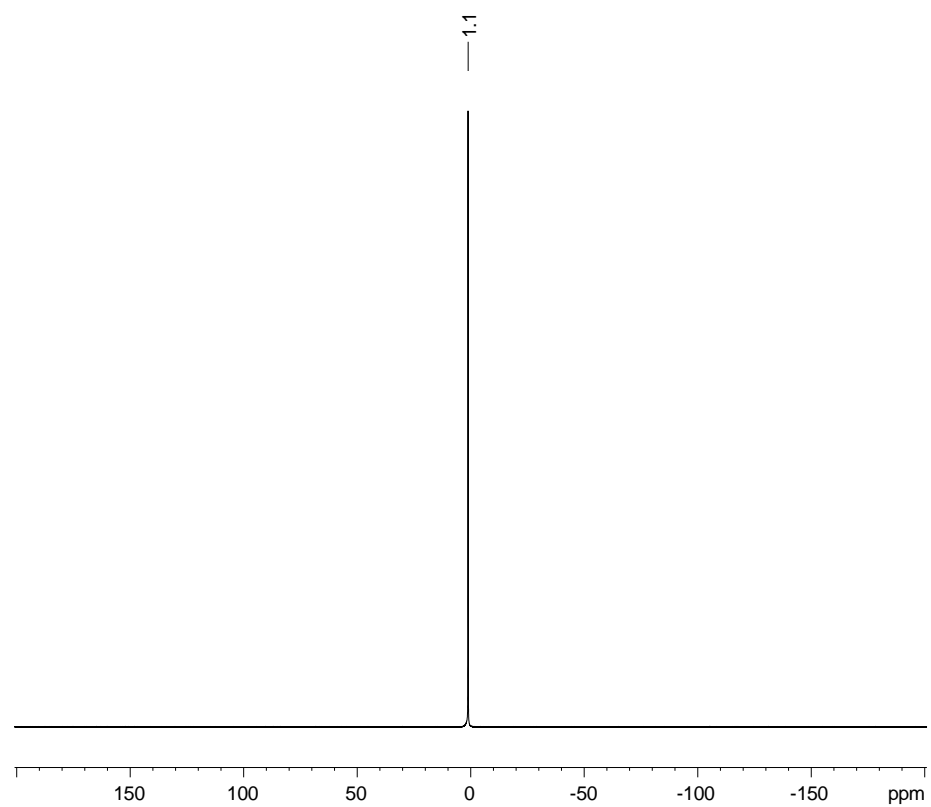

Current Data Parameters  
NAME MA197K\_11122019\_300  
EXPNO 12  
PROCNO 1

F2 - Acquisition Parameters  
Date\_ 20191211  
Time\_ 14.42 h  
INSTRUM spect  
PROBHD Z104275\_0338 (  
PULPROG zg30  
TD 32050  
SOLVENT C6D6  
NS 256  
DS 0  
SWH 46875.000 Hz  
FIDRES 2.925117 Hz  
AQ 0.3418667 sec  
RG 204.67  
DW 10.667 usec  
DE 6.50 usec  
TE 298.0 K  
D1 0.20000000 sec  
TD0 1  
SFO1 116.6419139 MHz  
NUC1  $^7\text{Li}$   
P1 8.81 usec  
PLW1 34.00000000 W

F2 - Processing parameters  
SI 32768  
SF 116.6419139 MHz  
WDW EM  
SSB 0  
LB 1.00 Hz  
GB 0  
PC 1.40

Figure S32.  $^7\text{Li}$ -NMR spectrum of compound **8**.

$^{13}\text{C}\{^1\text{H}\}$ -NMR of  $[\text{TbbGeH}_2][\text{Li}(\text{thf})_{1.5}]_2$  in  $\text{C}_6\text{D}_6$  (#) at rt

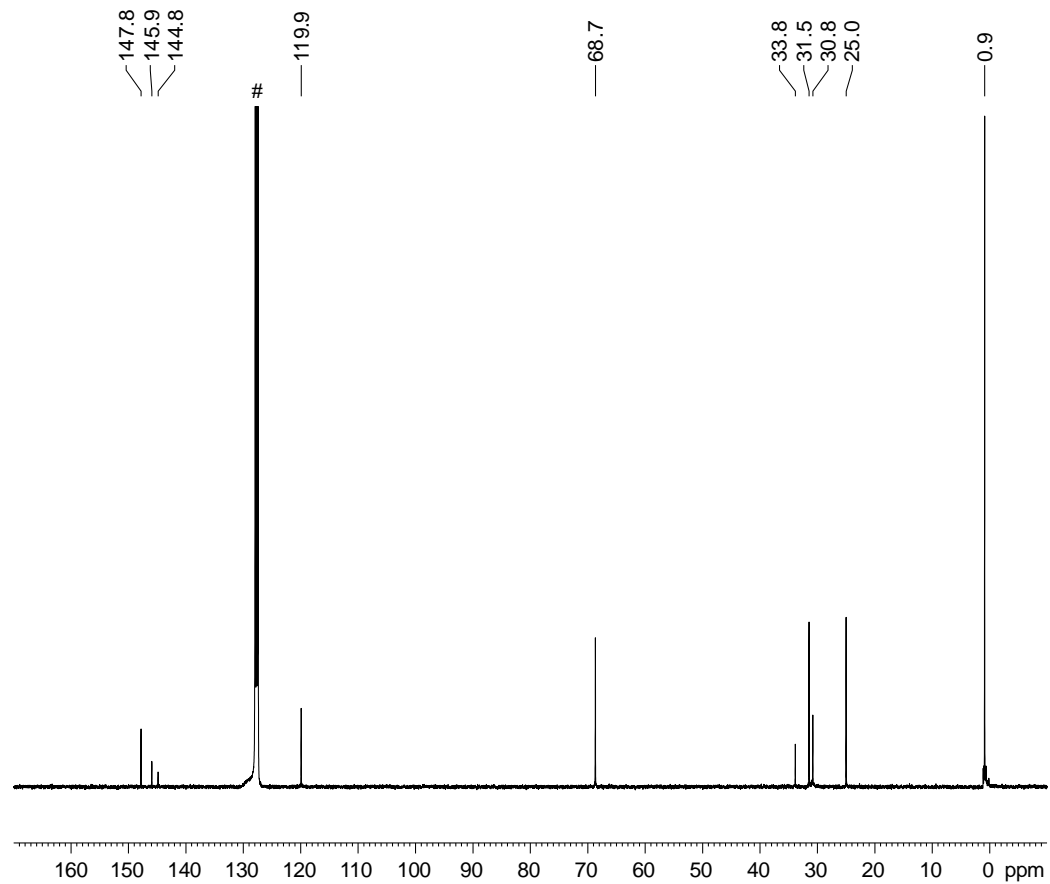

Current Data Parameters  
NAME MA197\_11122019\_400N  
EXPNO 11  
PROCNO 1

F2 - Acquisition Parameters  
Date\_ 20191212  
Time 2.09  
INSTRUM spect  
PROBHD 5 mm QNP 1H/13  
PULPROG zgpg30  
TD 53700  
SOLVENT C6D6  
NS 11264  
DS 0  
SWH 30864.197 Hz  
FIDRES 0.574752 Hz  
AQ 0.8699400 sec  
RG 32800  
DW 16.200 usec  
DE 6.00 usec  
TE 299.2 K  
D1 1.00000000 sec  
D11 0.03000000 sec  
TD0 1

===== CHANNEL f1 =====  
NUC1 13C  
P1 13.50 usec  
PL1 -4.16 dB  
PL1W 78.55633545 W  
SFO1 100.6198135 MHz

===== CHANNEL f2 =====  
CPDPRG[2] waltz16  
NUC2 1H  
PCPD2 80.00 usec  
PL2 -3.00 dB  
PL12 11.77 dB  
PL13 13.14 dB  
PL2W 16.03799057 W  
PL12W 0.53474891 W  
PL13W 0.39007664 W  
SFO2 400.1120007 MHz

F2 - Processing parameters  
SI 65536  
SF 100.6077400 MHz  
WDW EM  
SSB 0  
LB 1.00 Hz  
GB 0  
PC 1.40

Figure S33.  $^{13}\text{C}\{^1\text{H}\}$ -NMR spectrum of compound **8**.

$^{29}\text{Si}$ -INEPTND-NMR of  $([\text{TbbGeH}_2[\text{Li}(\text{thf})_{1.5}]_2)_2$  in  $\text{C}_6\text{D}_6$  at rt

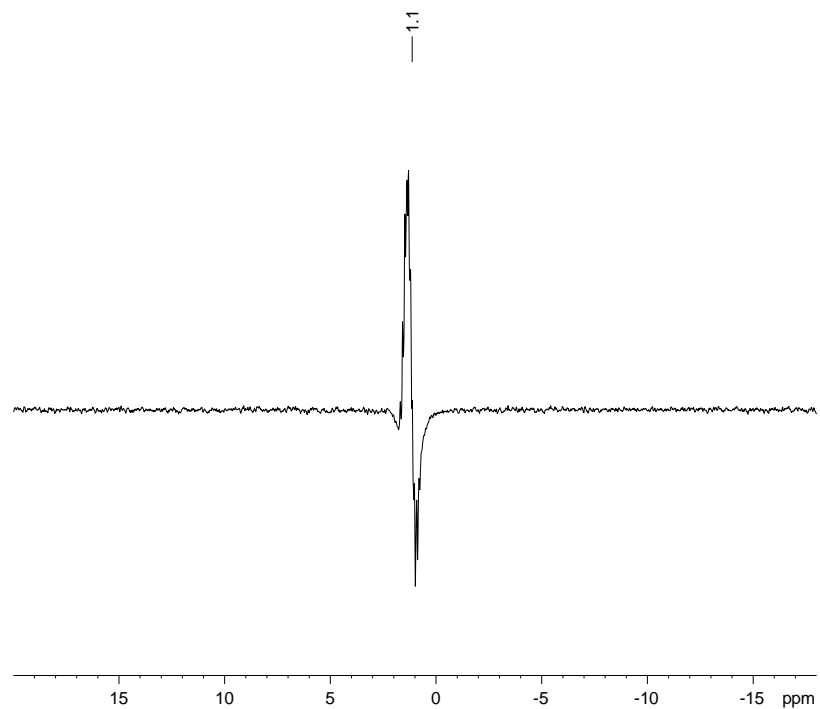

Current Data Parameters  
NAME MA197K\_11122019\_300  
EXPNO 11  
PROCNO 1

F2 - Acquisition Parameters  
Date\_ 20191211  
Time 14.39 h  
INSTRUM spect  
PROBHD Z104275\_0338 (  
PULPROG ineptnd  
TD 39048  
SOLVENT C6D6  
NS 320  
DS 0  
SWH 26315.789 Hz  
FIDRES 1.347869 Hz  
AQ 0.7419120 sec  
RG 204.67  
DW 19.000 usec  
DE 6.50 usec  
TE 298.0 K  
CNST2 6.5999999  
D1 2.00000000 sec  
D4 0.03787879 sec  
TD0 1  
SFO1 59.6229159 MHz  
NUC1 29Si  
P1 10.30 usec  
P2 20.60 usec  
PLW1 50.00000000 W  
SFO2 300.1312005 MHz  
NUC2 1H  
P3 14.00 usec  
P4 28.00 usec  
PLW2 8.26509953 W

F2 - Processing parameters  
SI 32768  
SF 59.6273858 MHz  
WDW EM  
SSB 0  
LB 2.00 Hz  
GB 0  
PC 1.00

Figure S34.  $^{29}\text{Si}$ -INEPTND-NMR spectrum of compound **8**.

# NMR spectra of compound 9a

<sup>1</sup>H-NMR of ([TbbGeH<sub>2</sub>][K(thf)<sub>0.5</sub>]<sub>4</sub>) in C<sub>6</sub>D<sub>6</sub> (#) at rt, \*: *n*-pentane, +: unknown impurity

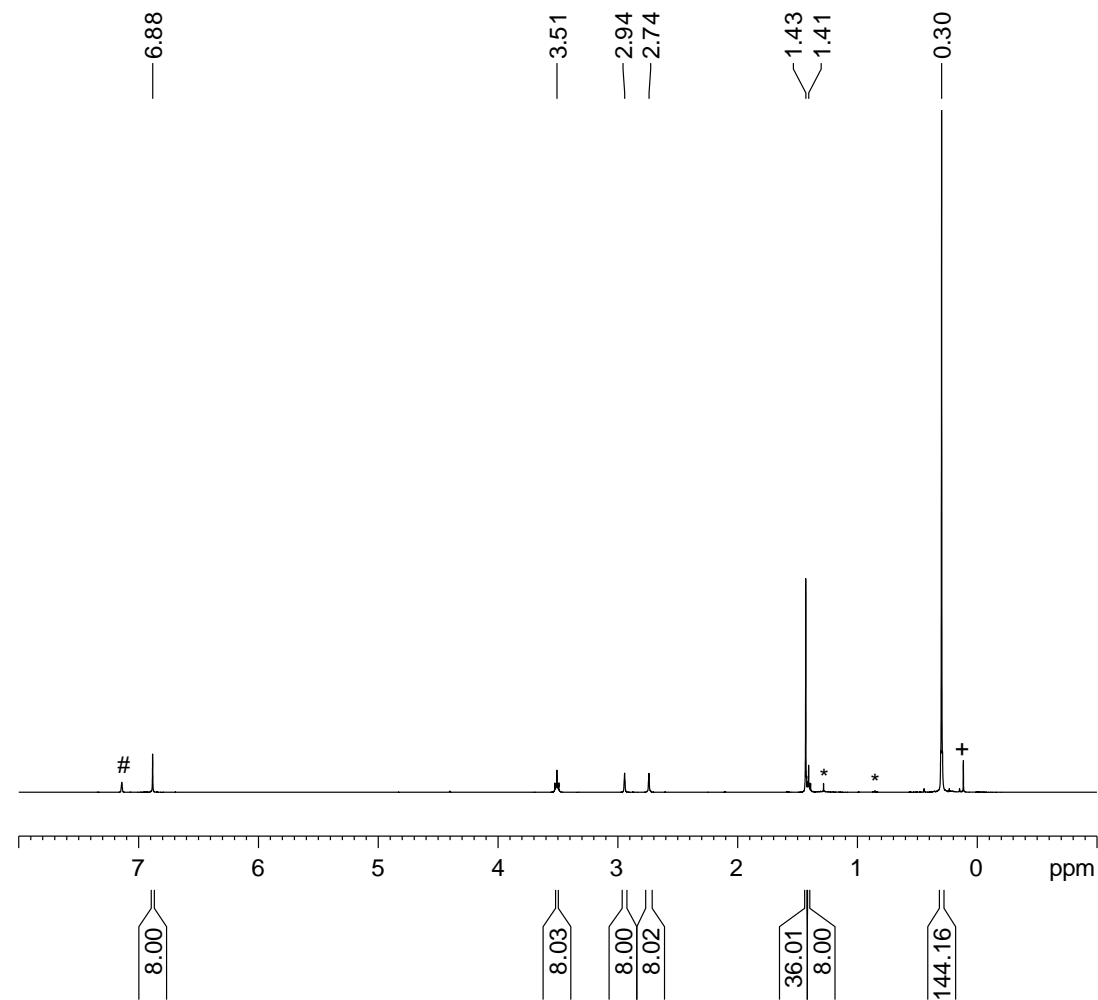

Current Data Parameters  
 NAME AS17F\_27112019\_300  
 EXPNO 10  
 PROCNO 1

F2 - Acquisition Parameters  
 Date\_ 20191127  
 Time 11.41  
 INSTRUM spect  
 PROBHD 5 mm QNP 1H/13  
 PULPROG zg30  
 TD 52656  
 SOLVENT C6D6  
 NS 16  
 DS 0  
 SWH 8305.647 Hz  
 FIDRES 0.157734 Hz  
 AQ 3.1698911 sec  
 RG 90.5  
 DW 60.200 usec  
 DE 6.00 usec  
 TE 299.2 K  
 D1 1.00000000 sec  
 TD0 1

==== CHANNEL f1 =====  
 NUC1 1H  
 P1 14.60 usec  
 PL1 -3.00 dB  
 PL1W 16.03799057 W  
 SFO1 400.1120007 MHz

F2 - Processing parameters  
 SI 65536  
 SF 400.1100000 MHz  
 WDW EM  
 SSB 0  
 LB 0 Hz  
 GB 0  
 PC 1.00

Figure S35. <sup>1</sup>H-NMR spectrum of compound 9a.

$^{13}\text{C}\{^1\text{H}\}$ -NMR of  $(\text{TbbGeH}_2)[\text{K}(\text{thf})_{0.5}]_4$  in  $\text{C}_6\text{D}_6$  (#) at rt

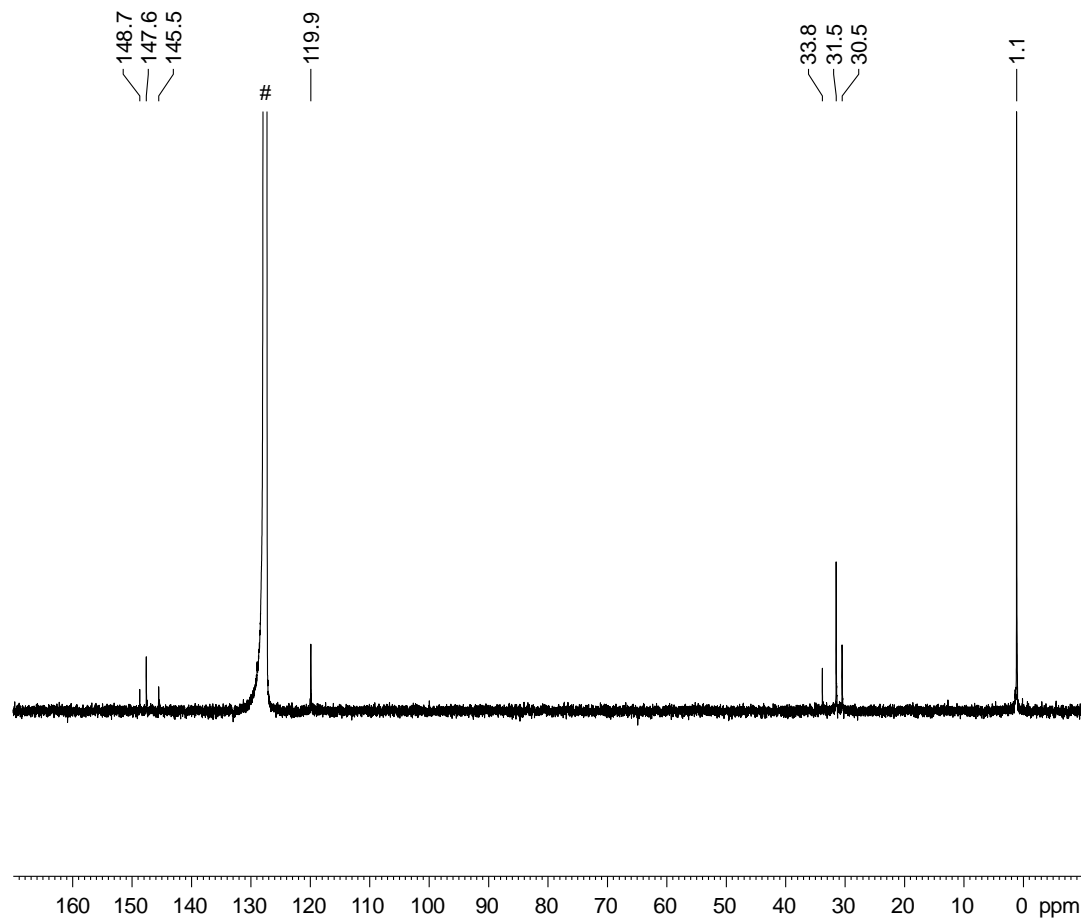

Current Data Parameters  
NAME AS17,18\_03122019\_400N  
EXPNO 11  
PROCNO 1

F2 - Acquisition Parameters  
Date\_ 20191204  
Time 1.36  
INSTRUM spect  
PROBHD 5 mm QNP 1H/13  
PULPROG zgpg30  
TD 53700  
SOLVENT C6D6  
NS 10240  
DS 0  
SWH 30864.197 Hz  
FIDRES 0.574752 Hz  
AQ 0.8699400 sec  
RG 32800  
DW 16.200 usec  
DE 6.00 usec  
TE 299.2 K  
D1 1.00000000 sec  
D11 0.03000000 sec  
TD0 1

=====  
CHANNEL f1  
=====  
NUC1 13C  
P1 13.50 usec  
PL1 -4.16 dB  
PL1W 78.55633545 W  
SFO1 100.6198135 MHz

=====  
CHANNEL f2  
=====  
CPDPRG2 waltz16  
NUC2 1H  
PCPD2 80.00 usec  
PL2 -3.00 dB  
PL12 11.77 dB  
PL13 13.14 dB  
PL2W 16.03799057 W  
PL12W 0.53474891 W  
PL13W 0.39007664 W  
SFO2 400.1120007 MHz

F2 - Processing parameters  
SI 65536  
SF 100.6077400 MHz  
WDW EM  
SSB 0  
LB 1.00 Hz  
GB 0  
PC 1.40

Figure S36.  $^{13}\text{C}\{^1\text{H}\}$ -NMR spectrum of compound **9a**.

$^{29}\text{Si}$ -INEPTND-NMR of  $([\text{TbbGeH}_2[\text{K}(\text{thf})_{0.5}]]_4)$  in  $\text{C}_6\text{D}_6$  at rt

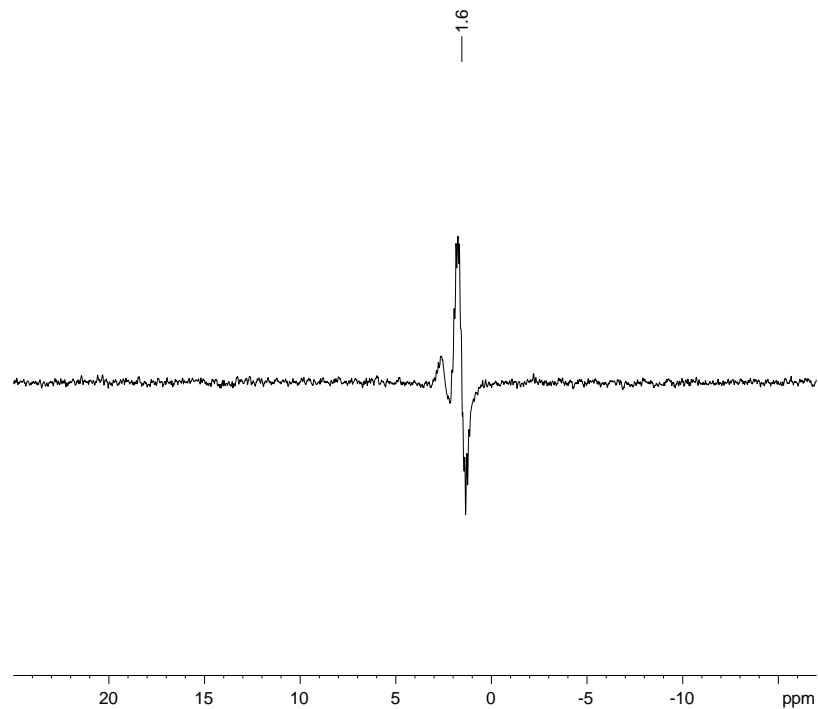

Current Data Parameters  
NAME MA649K\_10082021\_300N  
EXPNO 11  
PROCNO 1

F2 - Acquisition Parameters  
Date\_ 20210810  
Time 14.37 h  
INSTRUM spect  
PROBHD Z104275\_0338 (  
PULPROG ineptnd  
TD 39048  
SOLVENT C6D6  
NS 128  
DS 0  
SWH 26315.789 Hz  
FIDRES 1.347869 Hz  
AQ 0.7419120 sec  
RG 204.67  
DW 19.000 usec  
DE 6.50 usec  
TE 298.0 K  
CNST2 6.5999999  
D1 2.00000000 sec  
D4 0.03787879 sec  
TD0 1  
SFO1 59.6229159 MHz  
NUC1 29Si  
P1 10.30 usec  
P2 20.60 usec  
PLW1 50.00000000 W  
SFO2 300.1312005 MHz  
NUC2 1H  
P3 14.00 usec  
P4 28.00 usec  
PLW2 8.26509953 W

F2 - Processing parameters  
SI 32768  
SF 59.6273579 MHz  
WDW EM  
SSB 0  
LB 2.00 Hz  
GB 0  
PC 1.00

Figure S37.  $^{29}\text{Si}$ -INEPTND-NMR spectrum of compound **9a**.

NMR spectra of compound **9b**

<sup>1</sup>H-NMR of ([TbbGeH<sub>2</sub>][K{[18]-c-6}]) in C<sub>6</sub>D<sub>6</sub> (#) at rt, \*: *n*-hexane, +: unknown impurities

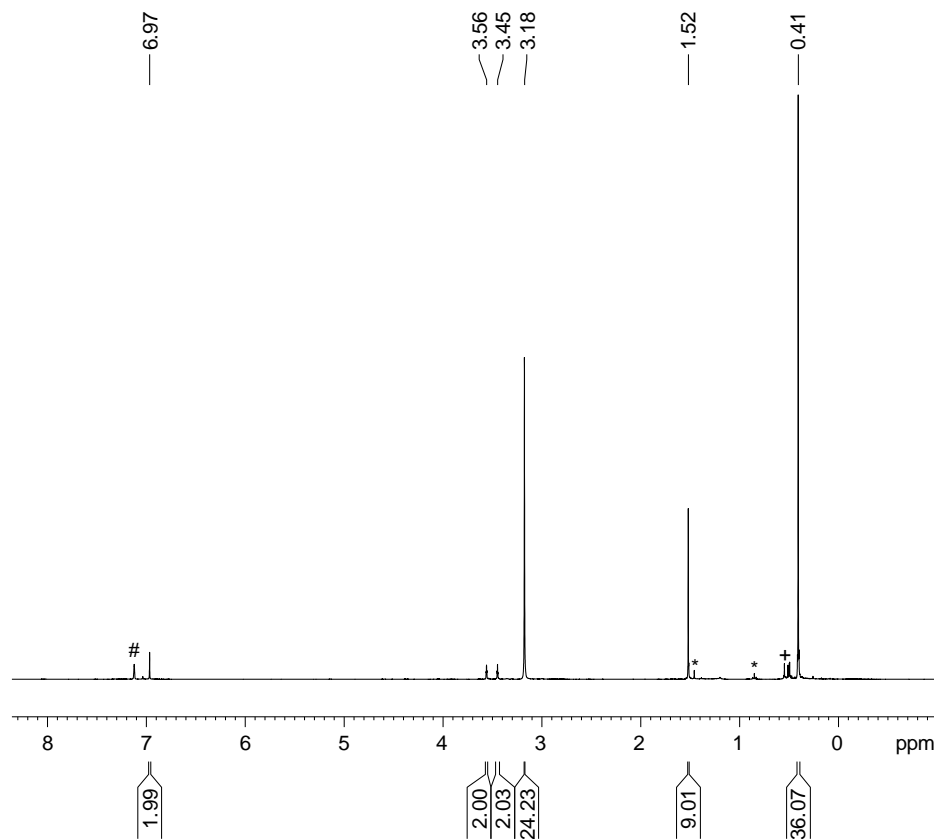

Current Data Parameters  
 NAME MA200K\_17122019\_400N  
 EXPNO 10  
 PROCNO 1

F2 - Acquisition Parameters  
 Date\_ 20191217  
 Time 20.06  
 INSTRUM spect  
 PROBHD 5 mm QNP 1H/13  
 PULPROG zg30  
 TD 52656  
 SOLVENT C6D6  
 NS 32  
 DS 0  
 SWH 8305.647 Hz  
 FIDRES 0.157734 Hz  
 AQ 3.1698911 sec  
 RG 203  
 DW 60.200 usec  
 DE 6.00 usec  
 TE 299.2 K  
 D1 1.00000000 sec  
 TD0 1

===== CHANNEL f1 =====  
 NUC1 1H  
 P1 14.60 usec  
 PL1 -3.00 dB  
 PL1W 16.03799057 W  
 SFO1 400.1120007 MHz

F2 - Processing parameters  
 SI 65536  
 SF 400.1100070 MHz  
 WDW EM  
 SSB 0  
 LB 0 Hz  
 GB 0  
 PC 1.00

Figure S38. <sup>1</sup>H-NMR spectrum of compound **9b**.



$^{13}\text{C}\{^1\text{H}\}$ -NMR of  $([\text{TbbGeH}_2][\text{K}([\text{18-c-6})])$  in  $\text{C}_6\text{D}_6$  (#) at rt, \*: *n*-hexane

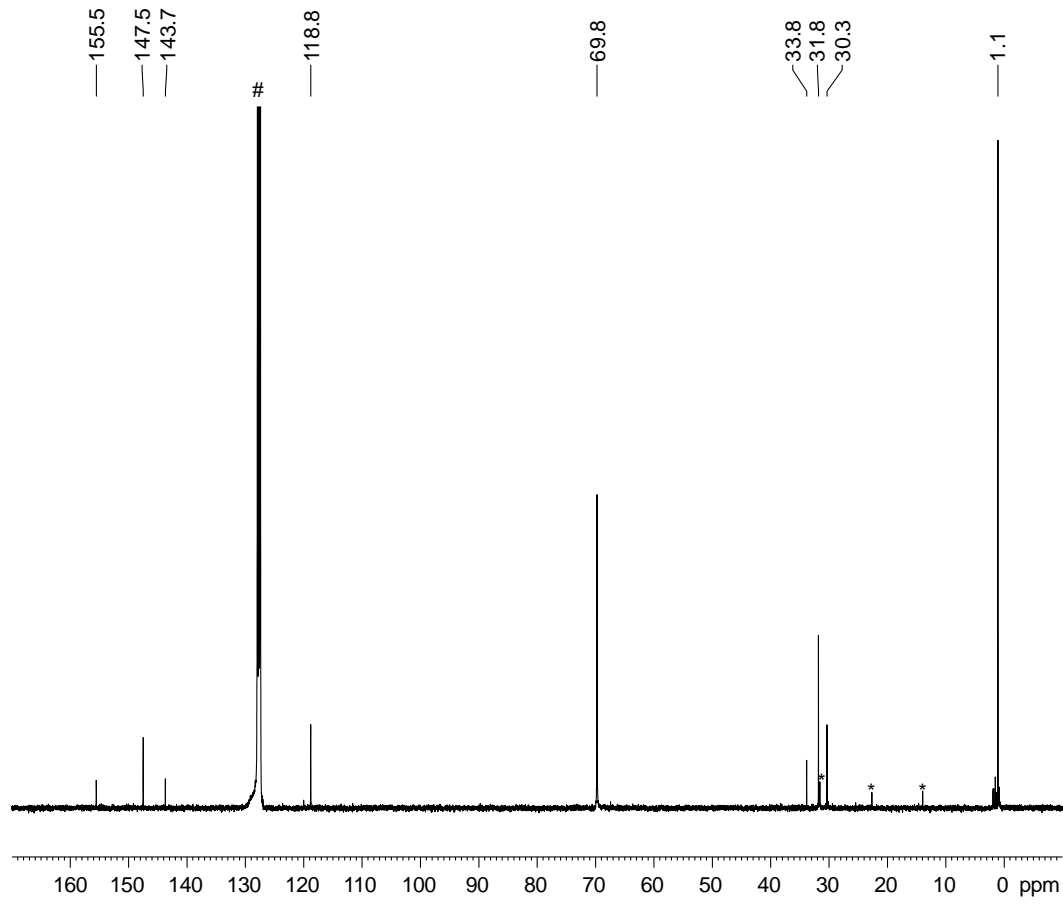

Current Data Parameters  
NAME MA200K\_17122019\_400N  
EXPNO 11  
PROCNO 1

F2 - Acquisition Parameters  
Date\_ 20191218  
Time 2.09  
INSTRUM spect  
PROBHD 5 mm QNP 1H/13  
PULPROG zgpg30  
TD 53700  
SOLVENT C6D6  
NS 11264  
DS 0  
SWH 30864.197 Hz  
FIDRES 0.574752 Hz  
AQ 0.8699400 sec  
RG 32800  
DW 16.200 usec  
DE 6.00 usec  
TE 299.2 K  
D1 1.00000000 sec  
D11 0.03000000 sec  
TD0 1

===== CHANNEL f1 =====  
NUC1 13C  
P1 13.50 usec  
PL1 -4.16 dB  
PL1W 78.55633545 W  
SFO1 100.6198135 MHz

===== CHANNEL f2 =====  
CPDPRG[2] waltz16  
NUC2 1H  
PCPD2 80.00 usec  
PL2 -3.00 dB  
PL12 11.77 dB  
PL13 13.14 dB  
PL2W 16.03799057 W  
PL12W 0.53474891 W  
PL13W 0.39007664 W  
SFO2 400.1120007 MHz

F2 - Processing parameters  
SI 65536  
SF 100.6077400 MHz  
WDW EM  
SSB 0  
LB 1.00 Hz  
GB 0  
PC 1.40

Figure S39.  $^{13}\text{C}\{^1\text{H}\}$ -NMR spectrum of compound **9b**.

<sup>29</sup>Si-INEPTND-NMR of ([TbbGeH<sub>2</sub>][K([18]-c-6)]) in C<sub>6</sub>D<sub>6</sub> at rt

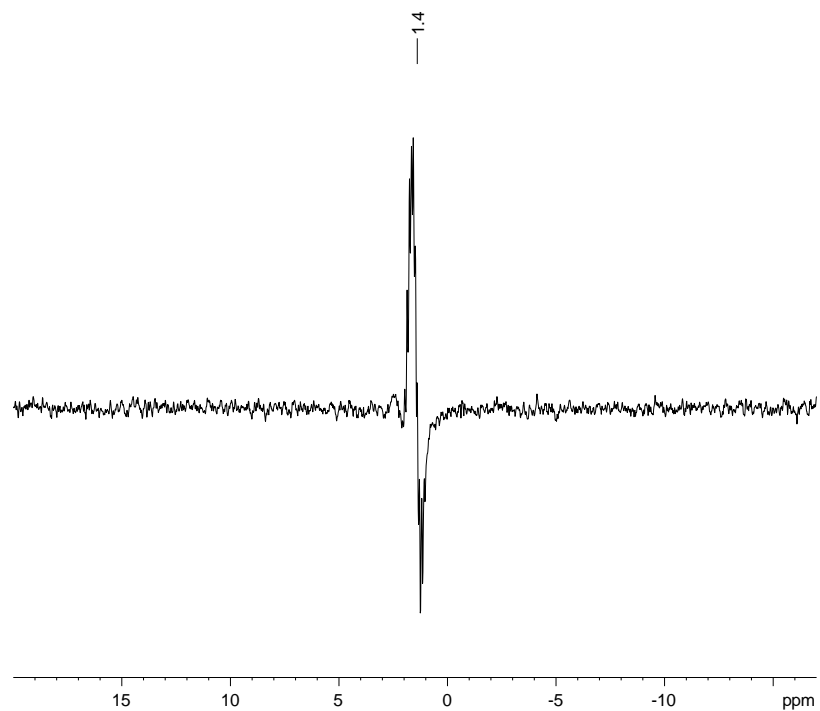

Current Data Parameters  
NAME MA200K\_18122019\_300  
EXPNO 11  
PROCNO 1

F2 - Acquisition Parameters  
Date\_ 20191218  
Time 17.04 h  
INSTRUM spect  
PROBHD Z104275\_0338 (  
PULPROG ineptnd  
TD 39048  
SOLVENT C6D6  
NS 320  
DS 0  
SWH 26315.789 Hz  
FIDRES 1.347869 Hz  
AQ 0.7419120 sec  
RG 204.67  
DW 19.000 usec  
DE 6.50 usec  
TE 298.0 K  
CNST2 6.5999999  
D1 2.0000000 sec  
D4 0.03787879 sec  
TD0 1  
SFO1 59.6229159 MHz  
NUC1 29Si  
P1 10.30 usec  
P2 20.60 usec  
PLW1 50.0000000 W  
SFO2 300.1312005 MHz  
NUC2 1H  
P3 14.00 usec  
P4 28.00 usec  
PLW2 8.26509953 W

F2 - Processing parameters  
SI 32768  
SF 59.6273454 MHz  
WDW EM  
SSB 0  
LB 2.00 Hz  
GB 0  
PC 1.00

Figure S40. <sup>29</sup>Si-INEPTND-NMR spectrum of compound **9b**.

# NMR spectra of compound 10

$^1\text{H-NMR}$  of  $([\text{TbSnH}_2][\text{Li}\{\text{thf}\}_x])$  in  $\text{C}_6\text{D}_6$  (#) at rt

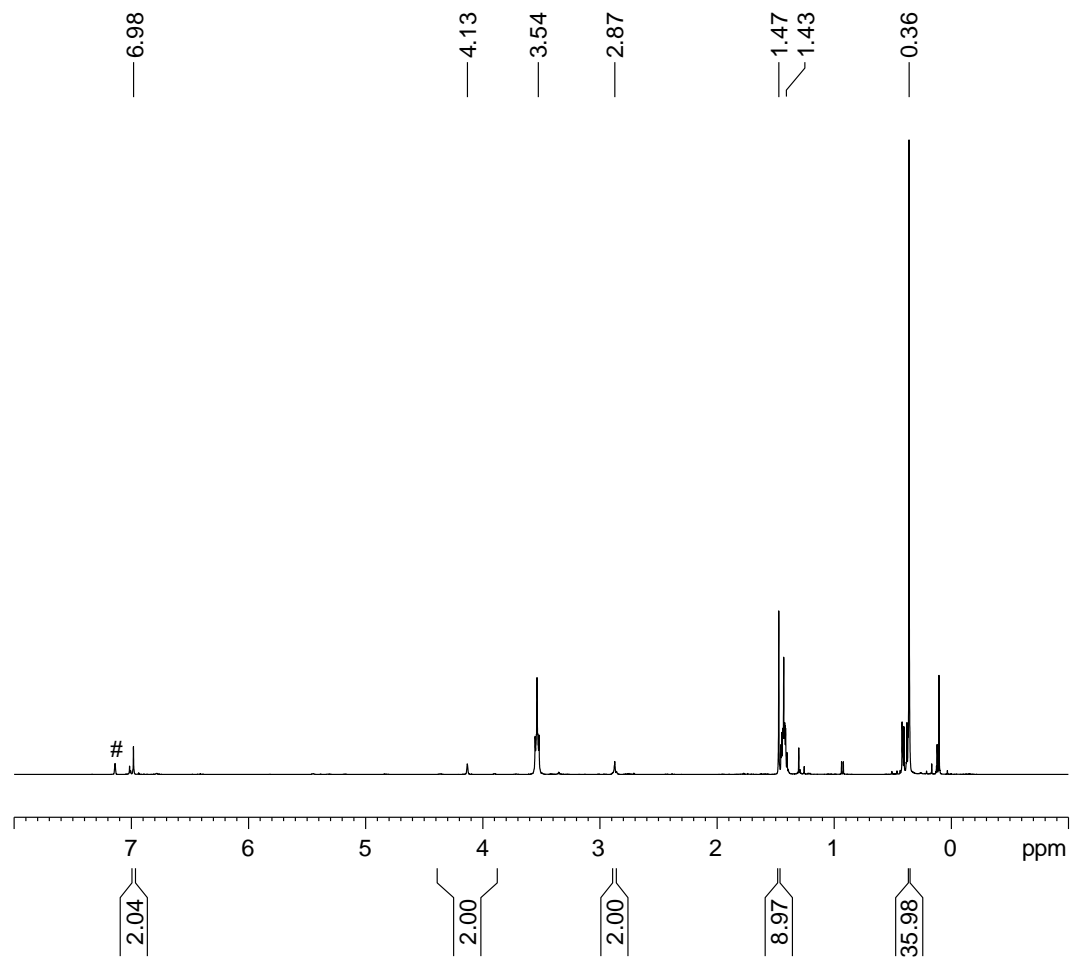

Current Data Parameters  
 NAME MA332\_15062020\_400N  
 EXPNO 10  
 PROCNO 1

F2 - Acquisition Parameters  
 Date\_ 20200615  
 Time 20.05  
 INSTRUM spect  
 PROBHD 5 mm QNP 1H/13  
 PULPROG zg30  
 TD 52656  
 SOLVENT C6D6  
 NS 32  
 DS 0  
 SWH 8305.647 Hz  
 FIDRES 0.157734 Hz  
 AQ 3.1698911 sec  
 RG 71.8  
 DW 60.200 usec  
 DE 6.00 usec  
 TE 299.2 K  
 D1 1.00000000 sec  
 TD0 1

==== CHANNEL f1 =====  
 NUC1 1H  
 P1 14.60 usec  
 PL1 -3.00 dB  
 PL1W 16.03799057 W  
 SFO1 400.1120007 MHz

F2 - Processing parameters  
 SI 65536  
 SF 400.1100003 MHz  
 WDW EM  
 SSB 0  
 LB 0 Hz  
 GB 0  
 PC 1.00

Figure S41.  $^1\text{H-NMR}$  spectrum of compound 10.

$^7\text{Li}$ -NMR of  $([\text{TbbSnH}_2][\text{Li}(\text{thf})_x])$  in  $\text{thf-d}_8$  at rt

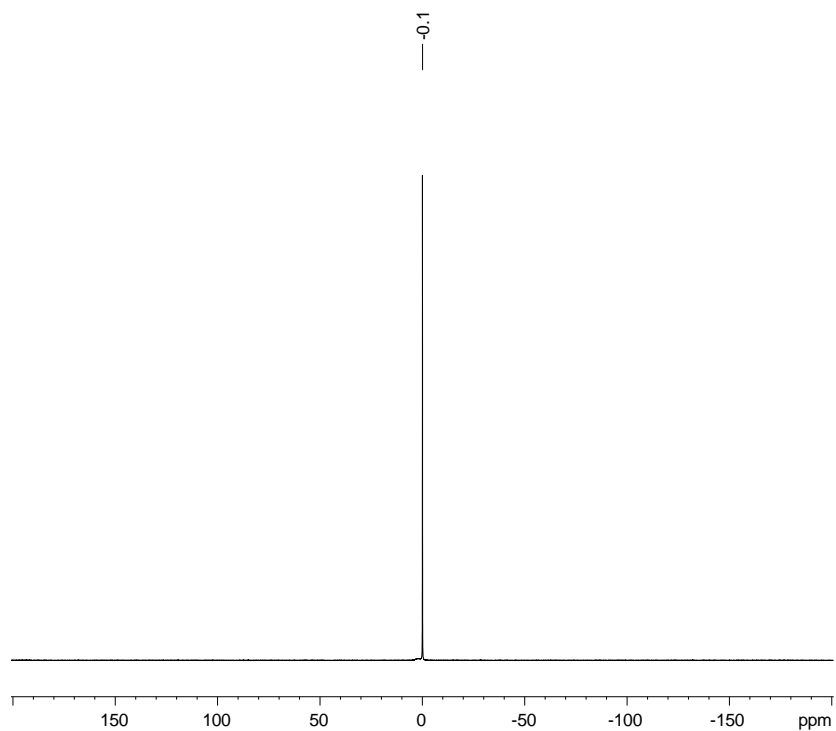

Current Data Parameters  
NAME MA320\_28052020\_300  
EXPNO 11  
PROCNO 1

F2 - Acquisition Parameters  
Date\_ 20200528  
Time 8.44 h  
INSTRUM spect  
PROBHD Z104275\_0338 (  
PULPROG zg30  
TD 32050  
SOLVENT THF  
NS 256  
DS 0  
SWH 46875.000 Hz  
FIDRES 2.925117 Hz  
AQ 0.3418667 sec  
RG 204.67  
DW 10.667 usec  
DE 6.50 usec  
TE 298.0 K  
D1 0.20000000 sec  
TD0 1  
SFO1 116.6419139 MHz  
NUC1  $^7\text{Li}$   
P0 2.94 usec  
P1 8.81 usec  
PLW1 34.00000000 W

F2 - Processing parameters  
SI 32768  
SF 116.6419139 MHz  
WDW EM  
SSB 0  
LB 5.00 Hz  
GB 0  
PC 1.40

Figure S42.  $^7\text{Li}$ -NMR spectrum of compound **10**.

$^{13}\text{C}\{^1\text{H}\}$ -NMR of  $([\text{TbbSnH}_2][\text{Li}\{\text{thf}\}_x])$  in  $\text{C}_6\text{D}_6$  (#) at rt

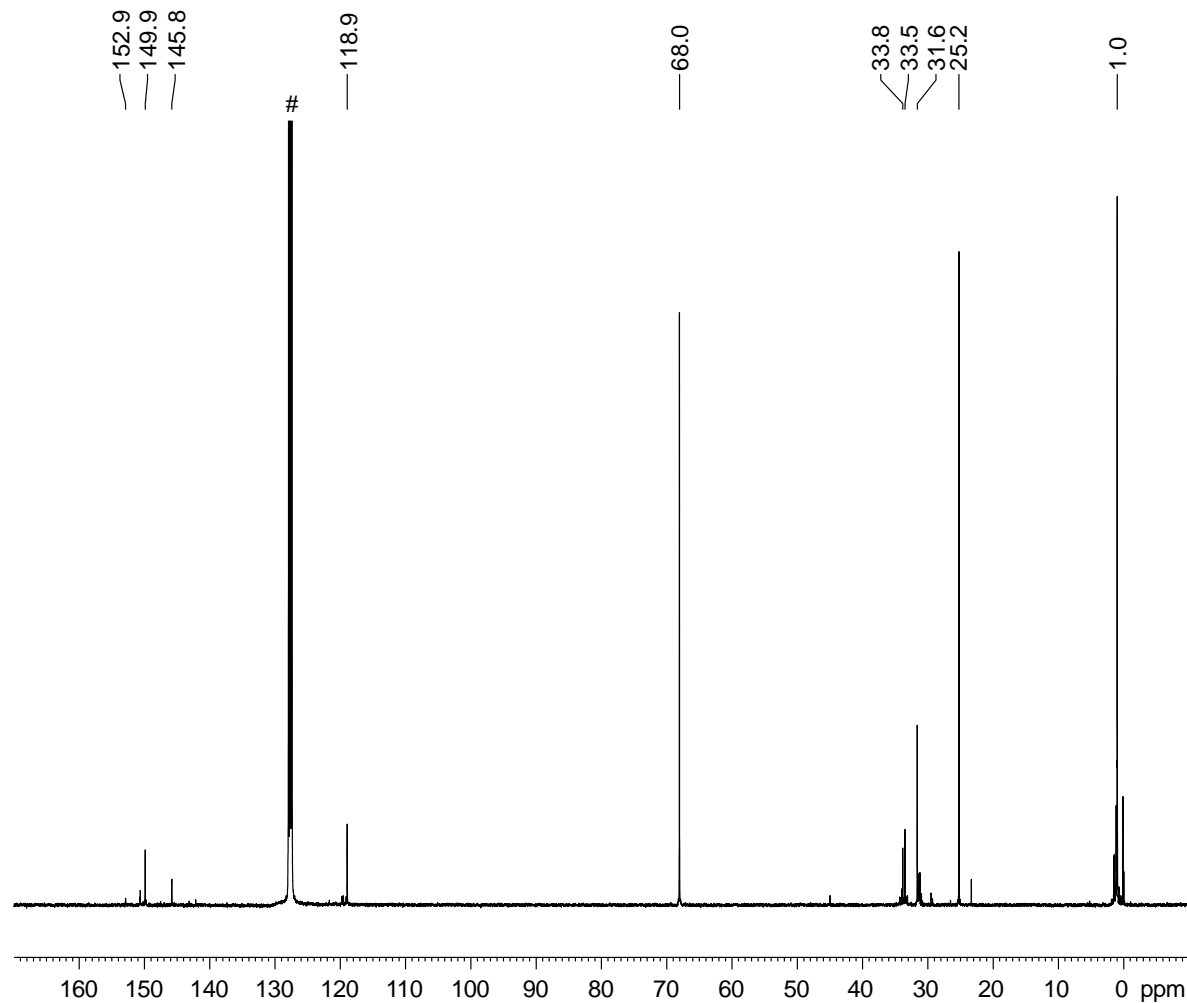

Current Data Parameters  
NAME MA332\_15062020\_400N  
EXPNO 11  
PROCNO 1

F2 - Acquisition Parameters  
Date\_ 20200616  
Time 2.08  
INSTRUM spect  
PROBHD 5 mm QNP 1H/13  
PULPROG zgpg30  
TD 53700  
SOLVENT C6D6  
NS 11264  
DS 0  
SWH 30864.197 Hz  
FIDRES 0.574752 Hz  
AQ 0.8699400 sec  
RG 32800  
DW 16.200 usec  
DE 6.00 usec  
TE 299.2 K  
D1 1.00000000 sec  
D11 0.03000000 sec  
TD0 1

===== CHANNEL f1 =====  
NUC1 13C  
P1 13.50 usec  
PL1 -4.16 dB  
PL1W 78.55633545 W  
SFO1 100.6198135 MHz

===== CHANNEL f2 =====  
CPDPRG[2] waltz16  
NUC2 1H  
PCPD2 80.00 usec  
PL2 -3.00 dB  
PL12 11.77 dB  
PL13 13.14 dB  
PL2W 16.03799057 W  
PL12W 0.53474891 W  
PL13W 0.39007664 W  
SFO2 400.1120007 MHz

F2 - Processing parameters  
SI 65536  
SF 100.6077400 MHz  
WDW EM  
SSB 0  
LB 1.00 Hz  
GB 0  
PC 1.40

Figure S43.  $^{13}\text{C}\{^1\text{H}\}$ -NMR spectrum of compound **10**.

$^{29}\text{Si}$ -INEPTND-NMR of  $([\text{TbbSnH}_2][\text{Li}(\text{thf})_x])$  in  $\text{thf-d}_8$  at rt

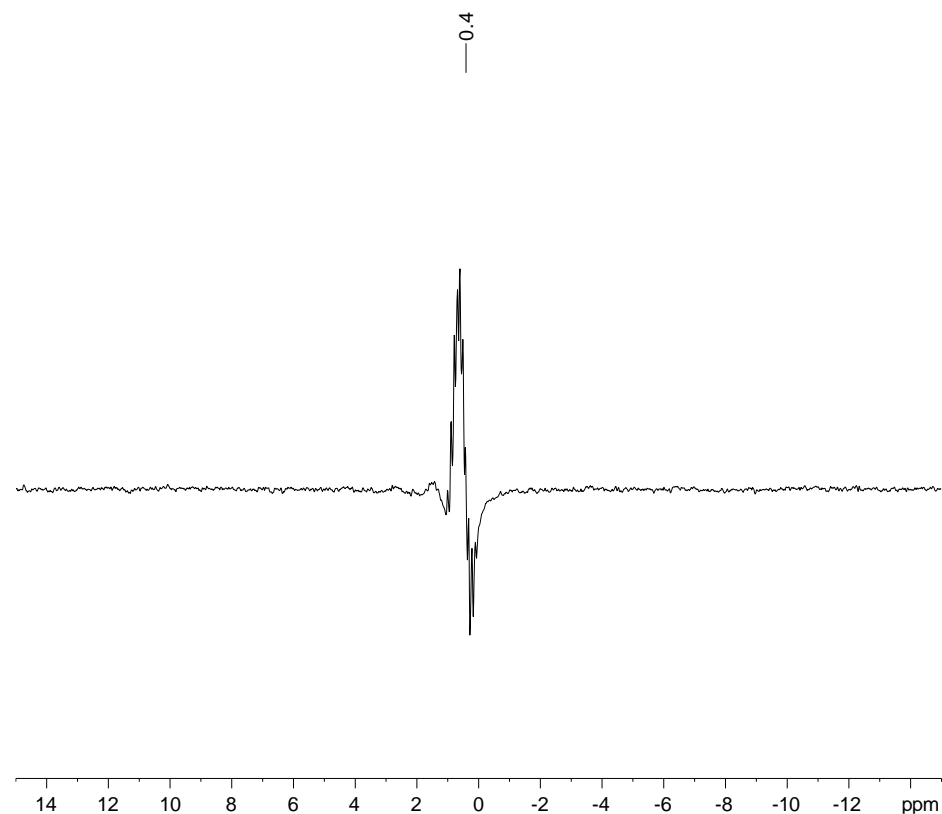

Current Data Parameters  
NAME MA320\_28052020\_300  
EXPNO 21  
PROCNO 1

F2 - Acquisition Parameters  
Date\_ 20200528  
Time 10.24 h  
INSTRUM spect  
PROBHD Z104275\_0338 (  
PULPROG ineptnd  
TD 39048  
SOLVENT THF  
NS 320  
DS 0  
SWH 26315.789 Hz  
FIDRES 1.347869 Hz  
AQ 0.7419120 sec  
RG 204.67  
DW 19.000 usec  
DE 6.50 usec  
TE 298.0 K  
CNST2 6.5999999  
D1 2.00000000 sec  
D4 0.03787879 sec  
TD0 1  
SFO1 59.6229159 MHz  
NUC1 29Si  
P1 10.30 usec  
P2 20.60 usec  
PLW1 50.00000000 W  
SFO2 300.1312005 MHz  
NUC2 1H  
P3 14.00 usec  
P4 28.00 usec  
PLW2 8.26509953 W

F2 - Processing parameters  
SI 32768  
SF 59.6273880 MHz  
WDW EM  
SSB 0  
LB 2.00 Hz  
GB 0  
PC 1.00

Figure S44.  $^{29}\text{Si}$ -INEPTND-NMR spectrum of compound **10**.

$^{119}\text{Sn}$ -NMR of  $([\text{TbbSnH}_2][\text{Li}\{\text{thf}\}_x])$  in  $\text{thf-d}_8$  at rt

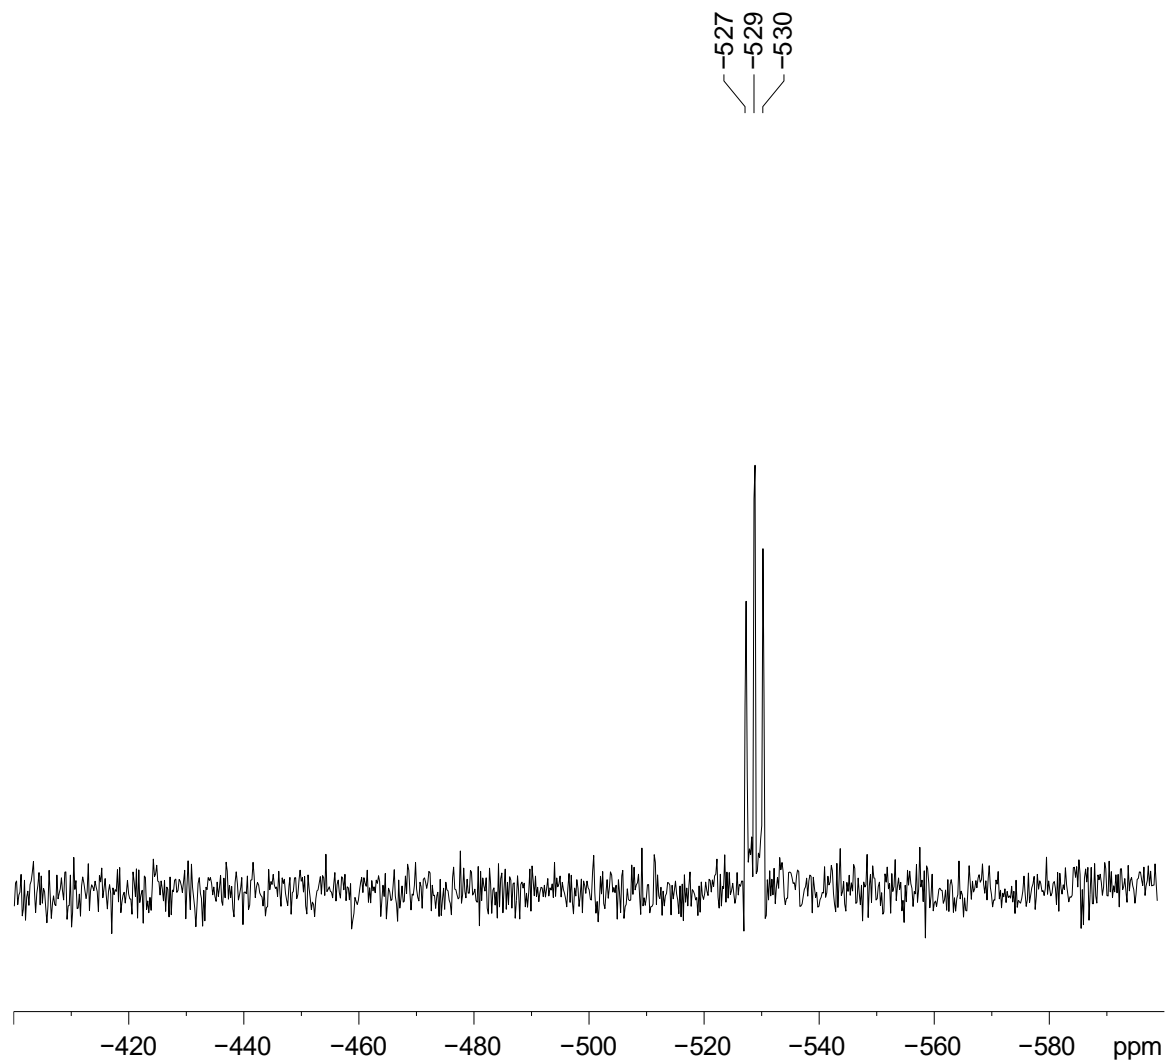

Current Data Parameters  
NAME MA320\_28052020\_300  
EXPNO 12  
PROCNO 1

F2 - Acquisition Parameters  
Date\_ 20200528  
Time 9.11 h  
INSTRUM spect  
PROBHD Z104275\_0338 (  
PULPROG zg30  
TD 8918  
SOLVENT THF  
NS 15360  
DS 1  
SWH 89285.711 Hz  
FIDRES 20.023708 Hz  
AQ 0.0499408 sec  
RG 204.67  
DW 5.600 usec  
DE 6.50 usec  
TE 298.0 K  
D1 0.02000000 sec  
TD0 1  
SFO1 111.8979900 MHz  
NUC1  $^{119}\text{Sn}$   
P0 4.03 usec  
P1 12.10 usec  
PLW1 12.00000000 W

F2 - Processing parameters  
SI 4096  
SF 111.9203740 MHz  
WDW EM  
SSB 0  
LB 0 Hz  
GB 0  
PC 1.40

Figure S45.  $^{119}\text{Sn}$ -NMR spectrum of compound **10**.

$^{119}\text{Sn}\{^1\text{H}\}$ -NMR of  $([\text{TbbSnH}_2][\text{Li}(\text{thf})_x])$  in  $\text{thf-d}_8$  at rt

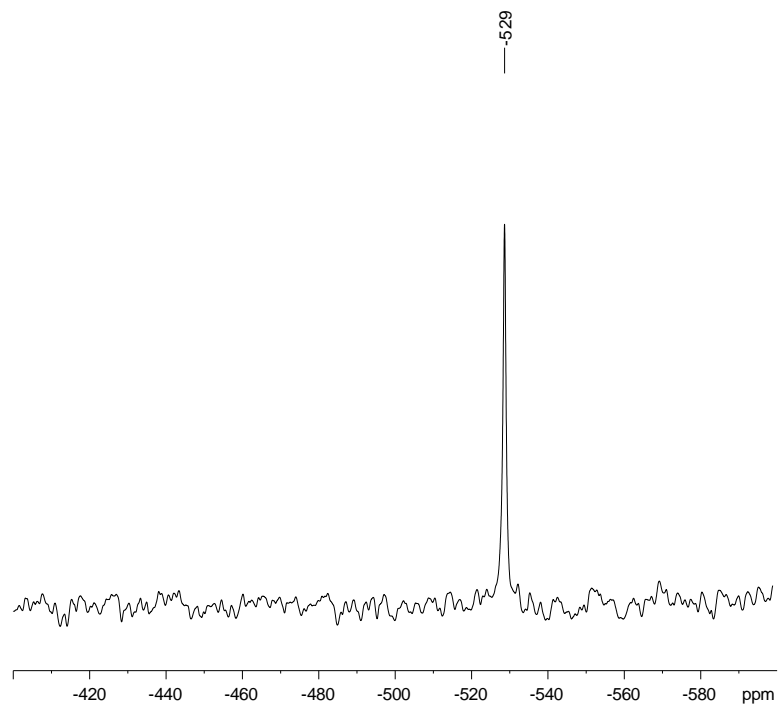

Current Data Parameters  
NAME MA320\_28052020\_300  
EXPNO 22  
PROCNO 1

F2 - Acquisition Parameters  
Date\_ 20200528  
Time 10.39 h  
INSTRUM spect  
PROBHD Z104275\_0338 (  
PULPROG zgpg30  
TD 39186  
SOLVENT THF  
NS 2253  
DS 4  
SWH 89285.711 Hz  
FIDRES 4.557021 Hz  
AQ 0.2194416 sec  
RG 204.67  
DW 5.600 usec  
DE 6.50 usec  
TE 298.0 K  
D1 0.10000000 sec  
D11 0.03000000 sec  
TD0 1  
SFO1 111.8979898 MHz  
NUC1  $^{119}\text{Sn}$   
P0 4.03 usec  
P1 12.10 usec  
PLW1 12.00000000 W  
SFO2 300.1312005 MHz  
NUC2  $^1\text{H}$   
CPDPRG2 waltz16  
PCPD2 90.00 usec  
PLW2 8.26509953 W  
PLW12 0.20000000 W

F2 - Processing parameters  
SI 65536  
SF 111.9203738 MHz  
WDW EM  
SSB 0  
LB 100.00 Hz  
GB 0  
PC 1.40

Figure S46.  $^{119}\text{Sn}\{^1\text{H}\}$ -NMR spectrum of compound **10**.



# NMR spectra of compound **11a**

$^1\text{H-NMR}$  of  $([\text{TbbSnH}_2][\text{K}\{\text{thf}\}_x])$  in  $\text{C}_6\text{D}_6$  (#) at rt

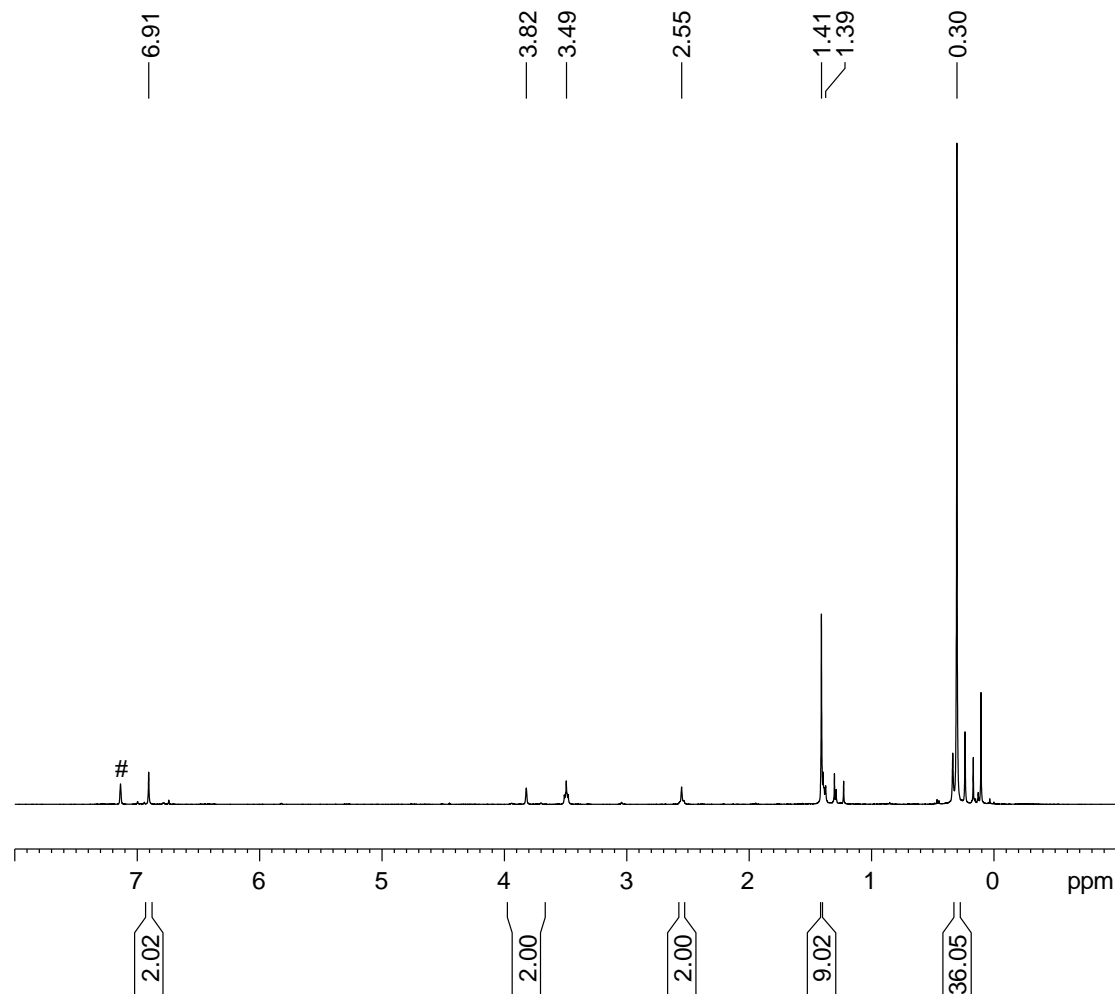

Current Data Parameters  
 NAME MA344\_29062020\_400N  
 EXPNO 10  
 PROCNO 1

F2 - Acquisition Parameters  
 Date\_ 20200629  
 Time 15.12  
 INSTRUM spect  
 PROBHD 5 mm QNP 1H/13  
 PULPROG zg30  
 TD 52656  
 SOLVENT C6D6  
 NS 16  
 DS 0  
 SWH 8305.647 Hz  
 FIDRES 0.157734 Hz  
 AQ 3.1698911 sec  
 RG 101  
 DW 60.200 usec  
 DE 6.00 usec  
 TE 299.2 K  
 D1 1.00000000 sec  
 TD0 1

===== CHANNEL f1 =====  
 NUC1 1H  
 P1 14.60 usec  
 PL1 -3.00 dB  
 PL1W 16.03799057 W  
 SFO1 400.1120007 MHz

F2 - Processing parameters  
 SI 65536  
 SF 400.1100016 MHz  
 WDW EM  
 SSB 0  
 LB 0 Hz  
 GB 0  
 PC 1.00

Figure S47.  $^1\text{H-NMR}$  spectrum of compound **11a**.

$^{13}\text{C}\{^1\text{H}\}$ -NMR of  $([\text{TbbSnH}_2][\text{K}\{\text{thf}\}_x])$  in  $\text{C}_6\text{D}_6$  (#) at rt

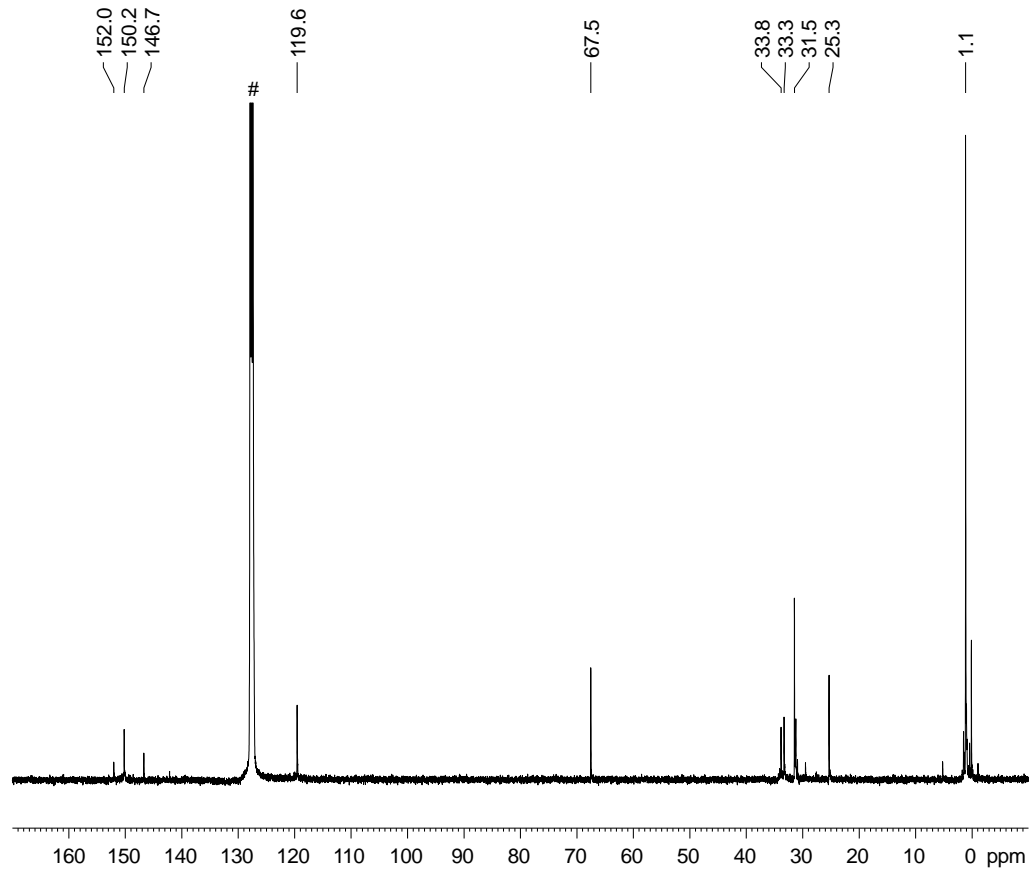

Current Data Parameters  
NAME MA344\_29062020\_400N  
EXPNO 12  
PROCNO 1

F2 - Acquisition Parameters  
Date\_ 20200630  
Time 2.09  
INSTRUM spect  
PROBHD 5 mm QNP 1H/13  
PULPROG zgpg30  
TD 53700  
SOLVENT C6D6  
NS 11264  
DS 0  
SWH 30864.197 Hz  
FIDRES 0.574752 Hz  
AQ 0.8699400 sec  
RG 32800  
DW 16.200 usec  
DE 6.00 usec  
TE 299.2 K  
D1 1.00000000 sec  
D11 0.03000000 sec  
TD0 1

===== CHANNEL f1 =====  
NUC1 13C  
P1 13.50 usec  
PL1 -4.16 dB  
PL1W 78.55633545 W  
SFO1 100.6198135 MHz

===== CHANNEL f2 =====  
CPDPRG[2] waltz16  
NUC2 1H  
PCPD2 80.00 usec  
PL2 -3.00 dB  
PL12 11.77 dB  
PL13 13.14 dB  
PL2W 16.03799057 W  
PL12W 0.53474891 W  
PL13W 0.39007664 W  
SFO2 400.1120007 MHz

F2 - Processing parameters  
SI 65536  
SF 100.6077400 MHz  
WDW EM  
SSB 0  
LB 1.00 Hz  
GB 0  
PC 1.40

Figure S48.  $^{13}\text{C}\{^1\text{H}\}$ -NMR spectrum of compound **11a**.

$^{29}\text{Si}$ -INEPTND-NMR of  $([\text{TbbSnH}_2][\text{K}(\text{thf})_x])$  in  $\text{thf-d}_8$  at rt

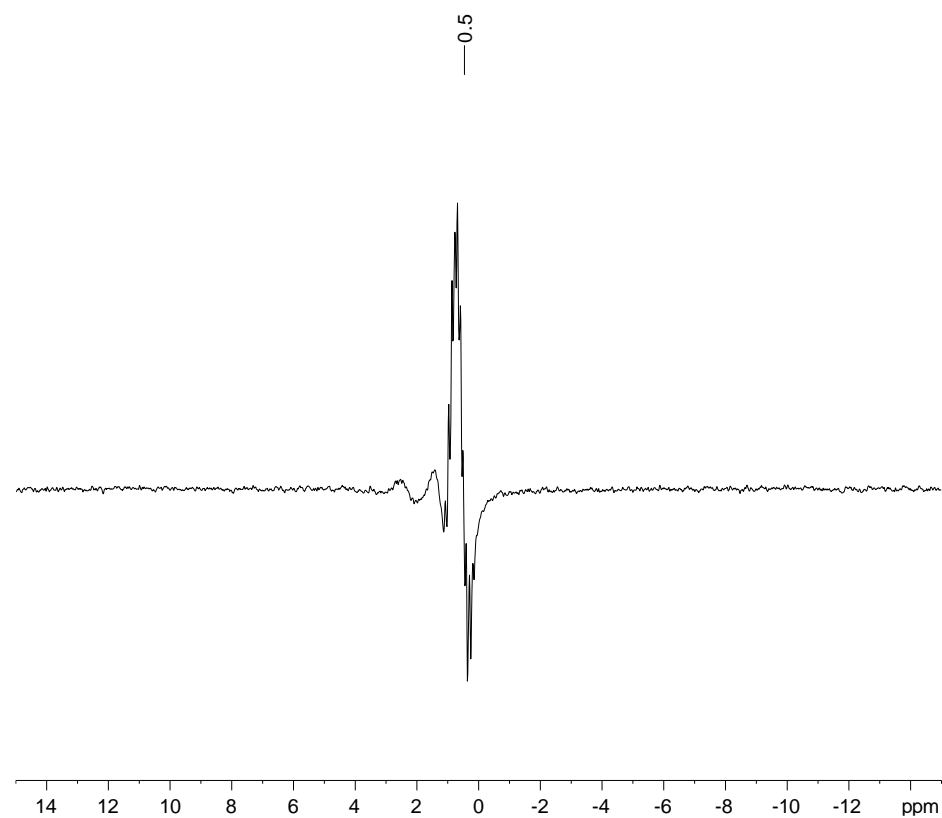

Current Data Parameters  
NAME MA340\_23062020\_300  
EXPNO 22  
PROCNO 1

F2 - Acquisition Parameters  
Date\_ 20200623  
Time 11.25 h  
INSTRUM spect  
PROBHD Z104275\_0338 (  
PULPROG ineptnd  
TD 39048  
SOLVENT THF  
NS 300  
DS 0  
SWH 26315.789 Hz  
FIDRES 1.347869 Hz  
AQ 0.7419120 sec  
RG 204.67  
DW 19.000 usec  
DE 6.50 usec  
TE 298.0 K  
CNST2 6.5999999  
D1 2.00000000 sec  
D4 0.03787879 sec  
TD0 1  
SFO1 59.6229159 MHz  
NUC1 29Si  
P1 10.30 usec  
P2 20.60 usec  
PLW1 50.00000000 W  
SFO2 300.1312005 MHz  
NUC2 1H  
P3 14.00 usec  
P4 28.00 usec  
PLW2 8.26509953 W

F2 - Processing parameters  
SI 32768  
SF 59.6273880 MHz  
WDW EM  
SSB 0  
LB 2.00 Hz  
GB 0  
PC 1.00

Figure S49.  $^{29}\text{Si}$ -INEPTND-NMR spectrum of compound **11a**.

$^{119}\text{Sn}$ -NMR of  $([\text{TbbSnH}_2][\text{K}(\text{thf})_x])$  in  $\text{thf-d}_8$  at rt

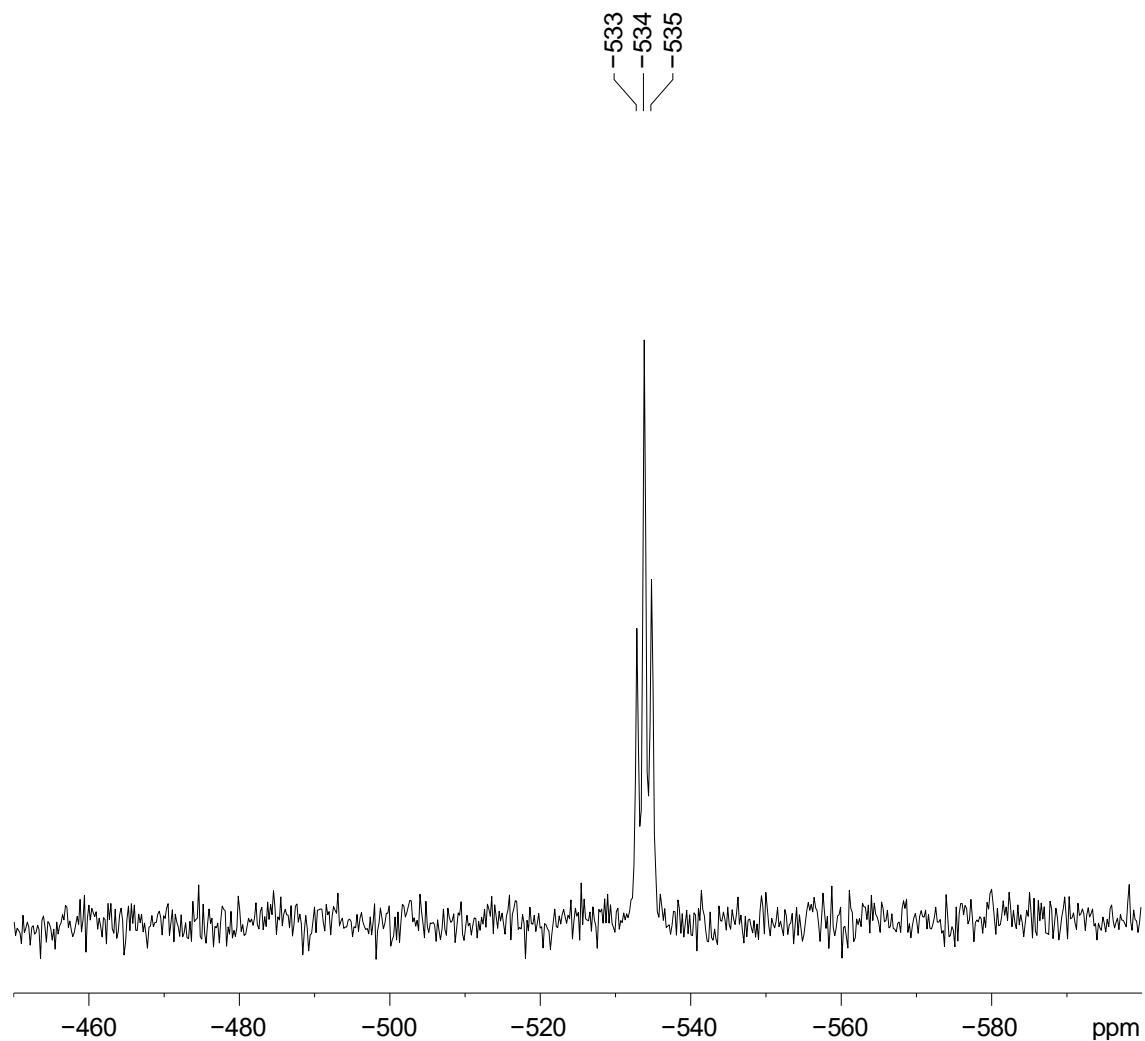

Current Data Parameters  
NAME MA340\_23062020\_300  
EXPNO 11  
PROCNO 1

F2 - Acquisition Parameters  
Date\_ 20200623  
Time 9.26 h  
INSTRUM spect  
PROBHD Z104275\_0338 (  
PULPROG zg30  
TD 8918  
SOLVENT THF  
NS 16384  
DS 1  
SWH 89285.711 Hz  
FIDRES 20.023708 Hz  
AQ 0.0499408 sec  
RG 204.67  
DW 5.600 usec  
DE 6.50 usec  
TE 298.0 K  
D1 0.02000000 sec  
TD0 1  
SFO1 111.8867979 MHz  
NUC1  $^{119}\text{Sn}$   
P0 4.03 usec  
P1 12.10 usec  
PLW1 12.00000000 W

F2 - Processing parameters  
SI 4096  
SF 111.9203740 MHz  
WDW EM  
SSB 0  
LB 5.00 Hz  
GB 0  
PC 1.40

Figure S50.  $^{119}\text{Sn}$ -NMR spectrum of compound **11a**.

$^{119}\text{Sn}\{^1\text{H}\}$ -NMR of  $([\text{TbbSnH}_2][\text{K}(\text{thf})_x])$  in  $\text{thf-d}_8$  at rt

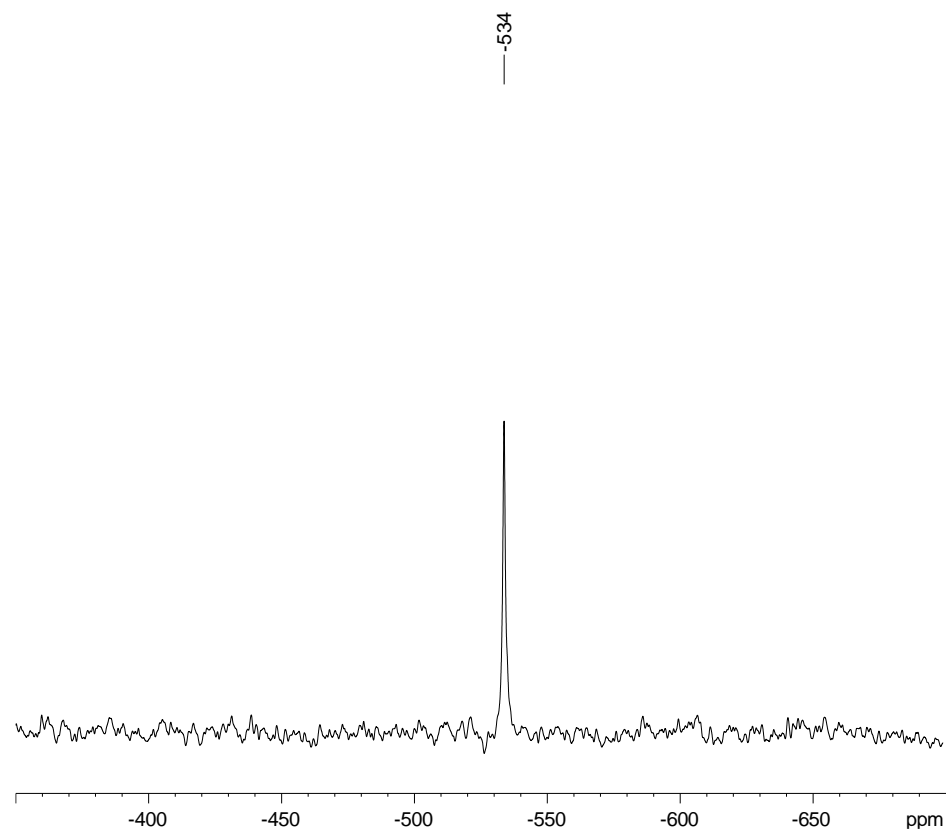

Current Data Parameters  
NAME MA340\_23062020\_300  
EXPNO 21  
PROCNO 1

F2 - Acquisition Parameters  
Date\_ 20200623  
Time 11.09 h  
INSTRUM spect  
PROBHD Z104275\_0338 (  
PULPROG zgig30  
TD 39186  
SOLVENT THF  
NS 2458  
DS 4  
SWH 89285.711 Hz  
FIDRES 4.557021 Hz  
AQ 0.2194416 sec  
RG 204.67  
DW 5.600 usec  
DE 6.50 usec  
TE 298.0 K  
D1 0.10000000 sec  
D11 0.03000000 sec  
TD0 1  
SFO1 111.8867977 MHz  
NUC1  $^{119}\text{Sn}$   
P0 4.03 usec  
P1 12.10 usec  
PLW1 12.00000000 W  
SFO2 300.1312005 MHz  
NUC2  $^1\text{H}$   
CPDPRG[2] waltz16  
PCPD2 90.00 usec  
PLW2 8.26509953 W  
PLW12 0.20000000 W

F2 - Processing parameters  
SI 65536  
SF 111.9203738 MHz  
WDW EM  
SSB 0  
LB 100.00 Hz  
GB 0  
PC 1.40

Figure S51.  $^{119}\text{Sn}\{^1\text{H}\}$ -NMR spectrum of compound **11a**.

# NMR spectra of compound **11b**

<sup>1</sup>H-NMR of ([TbbSnH<sub>2</sub>][K{[18]crown-6}]) in C<sub>6</sub>D<sub>6</sub> (#) at rt

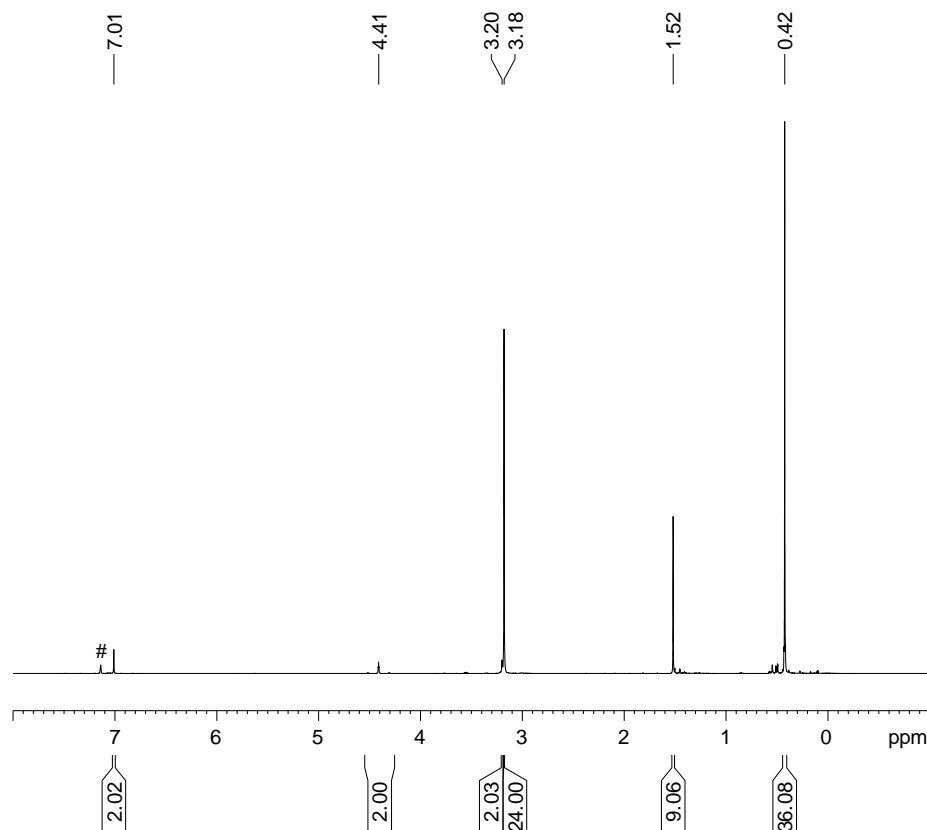

Current Data Parameters  
 NAME MA346\_01072020\_400N  
 EXPNO 10  
 PROCNO 1

F2 - Acquisition Parameters  
 Date\_ 20200701  
 Time 15.20  
 INSTRUM spect  
 PROBHD 5 mm QNP 1H/13  
 PULPROG zg30  
 TD 52656  
 SOLVENT C6D6  
 NS 16  
 DS 0  
 SWH 8305.647 Hz  
 FIDRES 0.157734 Hz  
 AQ 3.1698911 sec  
 RG 90.5  
 DW 60.200 usec  
 DE 6.00 usec  
 TE 299.2 K  
 D1 1.00000000 sec  
 TD0 1

==== CHANNEL f1 =====  
 NUC1 1H  
 P1 14.60 usec  
 PL1 -3.00 dB  
 PL1W 16.03799057 W  
 SFO1 400.1120007 MHz

F2 - Processing parameters  
 SI 65536  
 SF 400.1100000 MHz  
 WDW EM  
 SSB 0  
 LB 0 Hz  
 GB 0  
 PC 1.00

Figure S52. <sup>1</sup>H-NMR spectrum of compound **11b**.

$^{13}\text{C}\{^1\text{H}\}$ -NMR of ([TbbSnH<sub>2</sub>][K{[18]crown-6}]) in C<sub>6</sub>D<sub>6</sub> (#) at rt

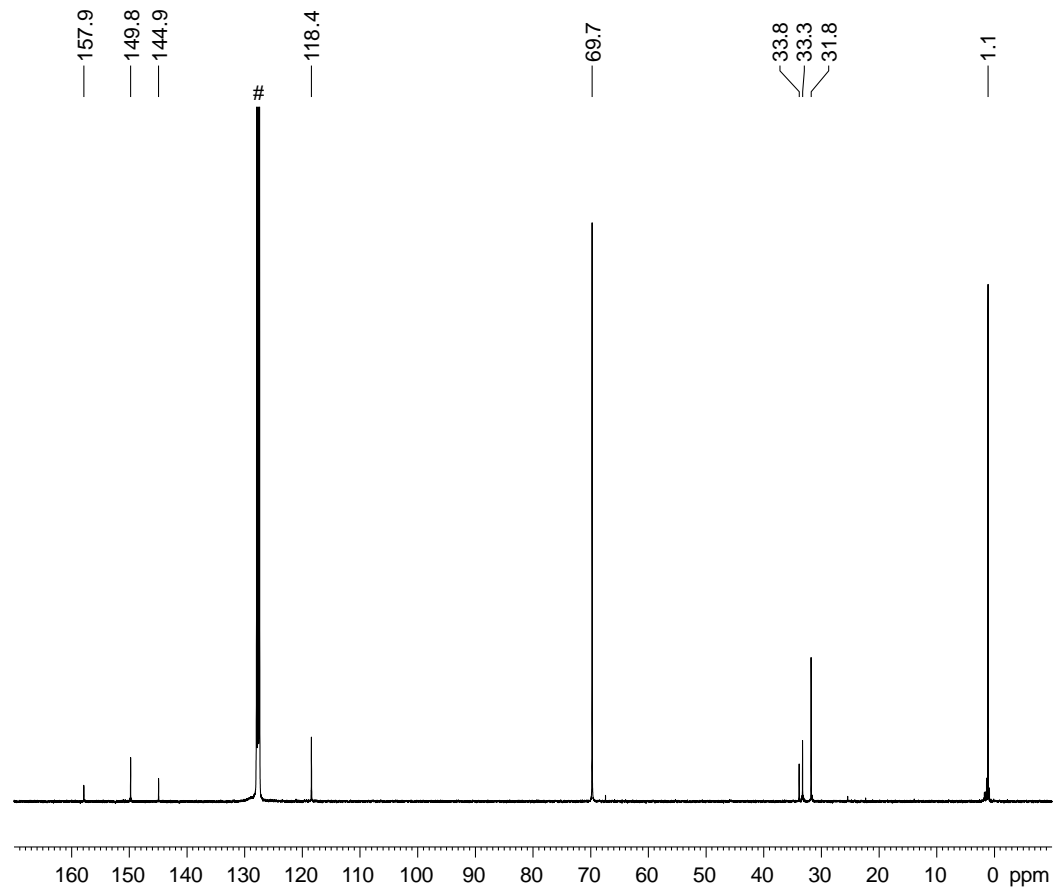

Current Data Parameters  
NAME MA346\_01072020\_400N  
EXPNO 12  
PROCNO 1

F2 - Acquisition Parameters  
Date\_ 20200702  
Time 2.09  
INSTRUM spect  
PROBHD 5 mm QNP 1H/13  
PULPROG zgpg30  
TD 53700  
SOLVENT C6D6  
NS 11264  
DS 0  
SWH 30864.197 Hz  
FIDRES 0.574752 Hz  
AQ 0.8699400 sec  
RG 32800  
DW 16.200 usec  
DE 6.00 usec  
TE 299.2 K  
D1 1.00000000 sec  
D11 0.03000000 sec  
TD0 1

==== CHANNEL f1 =====  
NUC1 13C  
P1 13.50 usec  
PL1 -4.16 dB  
PL1W 78.55633545 W  
SFO1 100.6198135 MHz

==== CHANNEL f2 =====  
CPDPRG2 waltz16  
NUC2 1H  
PCPD2 80.00 usec  
PL2 -3.00 dB  
PL12 11.77 dB  
PL13 13.14 dB  
PL2W 16.03799057 W  
PL12W 0.53474891 W  
PL13W 0.39007664 W  
SFO2 400.1120007 MHz

F2 - Processing parameters  
SI 65536  
SF 100.6077400 MHz  
WDW EM  
SSB 0  
LB 1.00 Hz  
GB 0  
PC 1.40

Figure S53.  $^{13}\text{C}\{^1\text{H}\}$ -NMR spectrum of compound **11b**.

<sup>29</sup>Si-INEPTND-NMR of ((TbbSnH<sub>2</sub>)[K{[18]crown-6}]) in C<sub>6</sub>D<sub>6</sub> at rt

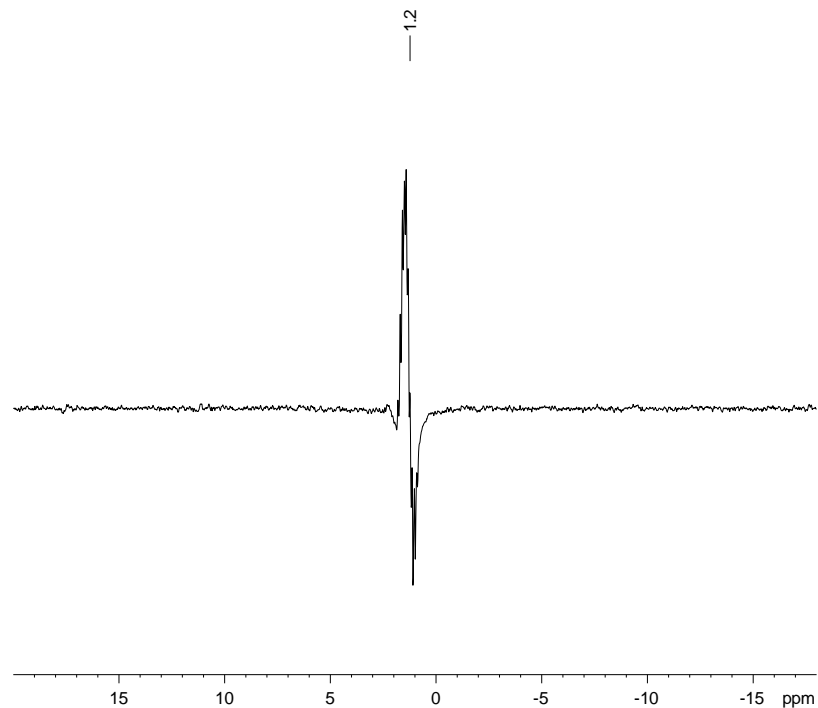

Current Data Parameters  
NAME MA346\_02072020\_300  
EXPNO 11  
PROCNO 1

F2 - Acquisition Parameters  
Date\_ 20200702  
Time 8.13 h  
INSTRUM spect  
PROBHD Z104275\_0338 (  
PULPROG ineptnd  
TD 39048  
SOLVENT C6D6  
NS 320  
DS 0  
SWH 26315.789 Hz  
FIDRES 1.347869 Hz  
AQ 0.7419120 sec  
RG 204.67  
DW 19.000 usec  
DE 6.50 usec  
TE 298.0 K  
CNST2 6.5999999  
D1 2.00000000 sec  
D4 0.03787879 sec  
TD0 1  
SFO1 59.6229159 MHz  
NUC1 29Si  
P1 10.30 usec  
P2 20.60 usec  
PLW1 50.00000000 W  
SFO2 300.1312005 MHz  
NUC2 1H  
P3 14.00 usec  
P4 28.00 usec  
PLW2 8.26509953 W

F2 - Processing parameters  
SI 32768  
SF 59.6273582 MHz  
WDW EM  
SSB 0  
LB 2.00 Hz  
GB 0  
PC 1.00

Figure S54. <sup>29</sup>Si-INEPTND-NMR spectrum of compound **11b**.



$^{119}\text{Sn}$ -NMR of  $([\text{TbbSnH}_2[\text{K}\{[18]\text{crown-6}}]])$  in  $\text{C}_6\text{D}_6$  at rt

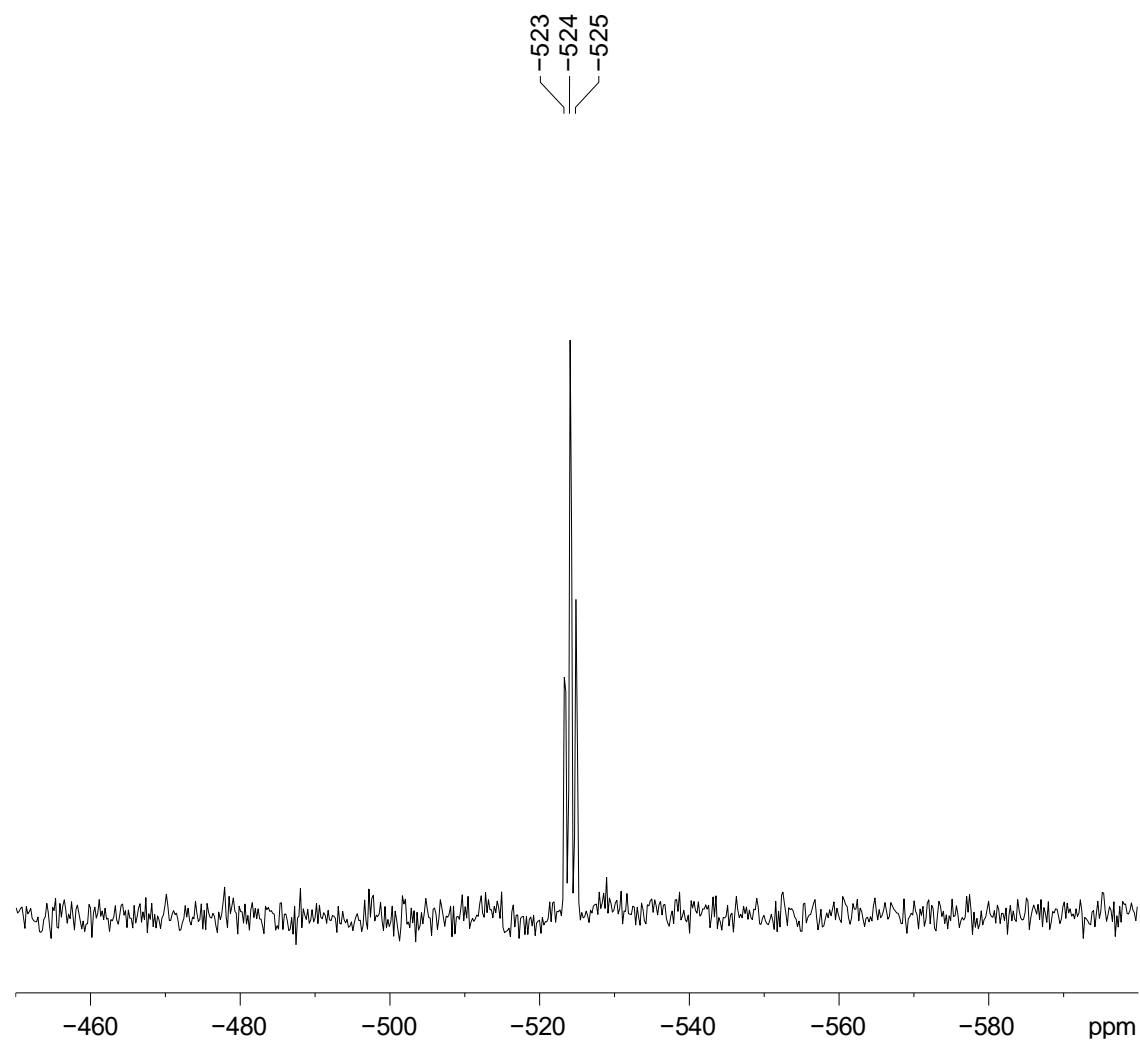

Current Data Parameters  
NAME MA346\_01072020\_300  
EXPNO 11  
PROCNO 1

F2 - Acquisition Parameters  
Date\_ 20200701  
Time 14.31 h  
INSTRUM spect  
PROBHD Z104275\_0338 (  
PULPROG zg30  
TD 8918  
SOLVENT C6D6  
NS 16384  
DS 1  
SWH 89285.711 Hz  
FIDRES 20.023708 Hz  
AQ 0.0499408 sec  
RG 204.67  
DW 5.600 usec  
DE 6.50 usec  
TE 298.0 K  
D1 0.02000000 sec  
TD0 1  
SFO1 111.8867979 MHz  
NUC1 119Sn  
P0 4.03 usec  
P1 12.10 usec  
PLW1 12.00000000 W

F2 - Processing parameters  
SI 4096  
SF 111.9203740 MHz  
WDW EM  
SSB 0  
LB 3.00 Hz  
GB 0  
PC 1.40

Figure S55.  $^{119}\text{Sn}$ -NMR spectrum of compound **11b**.

$^{119}\text{Sn}\{^1\text{H}\}$ -NMR of  $([\text{TbSnH}_2][\text{K}(\text{18-crown-6})])$  in  $\text{C}_6\text{D}_6$  at rt

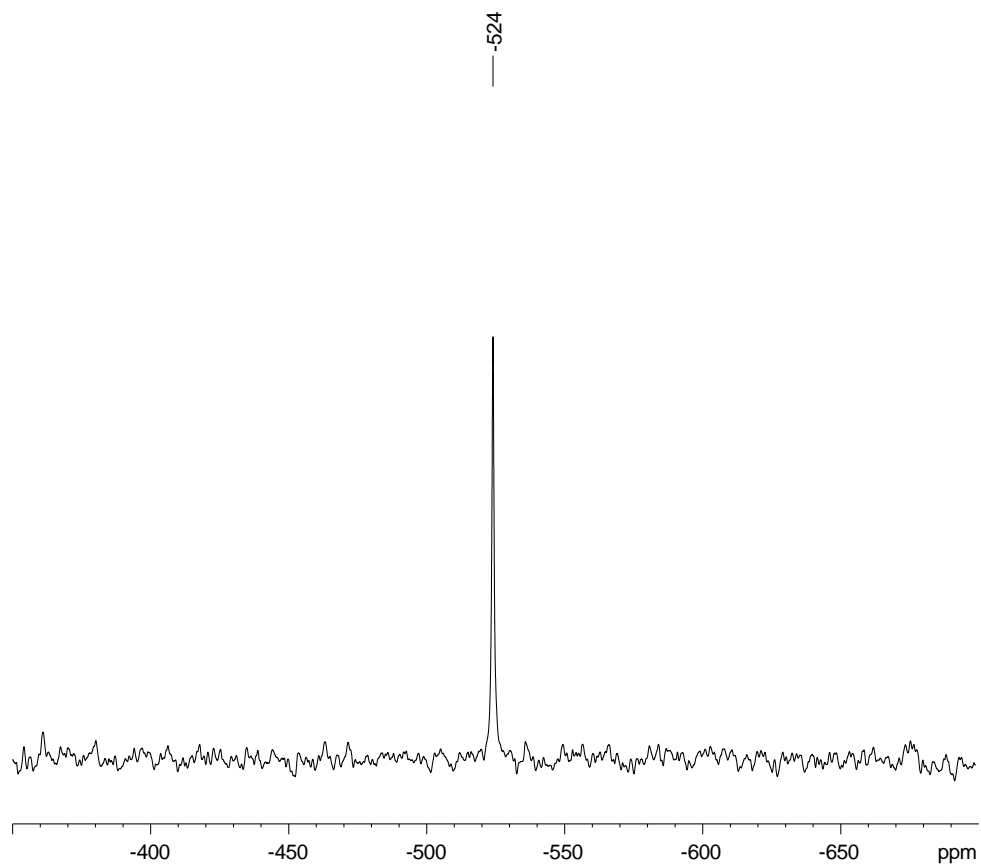

Current Data Parameters  
NAME MA346\_02072020\_300  
EXPNO 10  
PROCNO 1

F2 - Acquisition Parameters  
Date\_ 20200702  
Time 7.57 h  
INSTRUM spect  
PROBHD Z104275\_0338 (  
PULPROG zgig30  
TD 39186  
SOLVENT C6D6  
NS 2458  
DS 4  
SWH 89285.711 Hz  
FIDRES 4.557021 Hz  
AQ 0.2194416 sec  
RG 204.67  
DW 5.600 usec  
DE 6.50 usec  
TE 298.0 K  
D1 0.10000000 sec  
D11 0.03000000 sec  
TD0 1  
SFO1 111.8867977 MHz  
NUC1  $^{119}\text{Sn}$   
P0 4.03 usec  
P1 12.10 usec  
PLW1 12.00000000 W  
SFO2 300.1312005 MHz  
NUC2  $^1\text{H}$   
CPDPRG[2] waltz16  
PCPD2 90.00 usec  
PLW2 8.26509953 W  
PLW12 0.20000000 W

F2 - Processing parameters  
SI 65536  
SF 111.9203738 MHz  
WDW EM  
SSB 0  
LB 100.00 Hz  
GB 0  
PC 1.40

Figure S56.  $^{119}\text{Sn}\{^1\text{H}\}$ -NMR spectrum of compound **11b**.

# NMR spectra of compound 12

$^1\text{H-NMR}$  of  $[\text{TbbSnH}_2][\text{Al}(\text{OC}(\text{CF}_3)_3)_4]$  in toluene- $d_8$  (#) + 1,2-difluorobenzene (\*) at  $-40^\circ\text{C}$ , +:  $\text{HCPPh}_3$

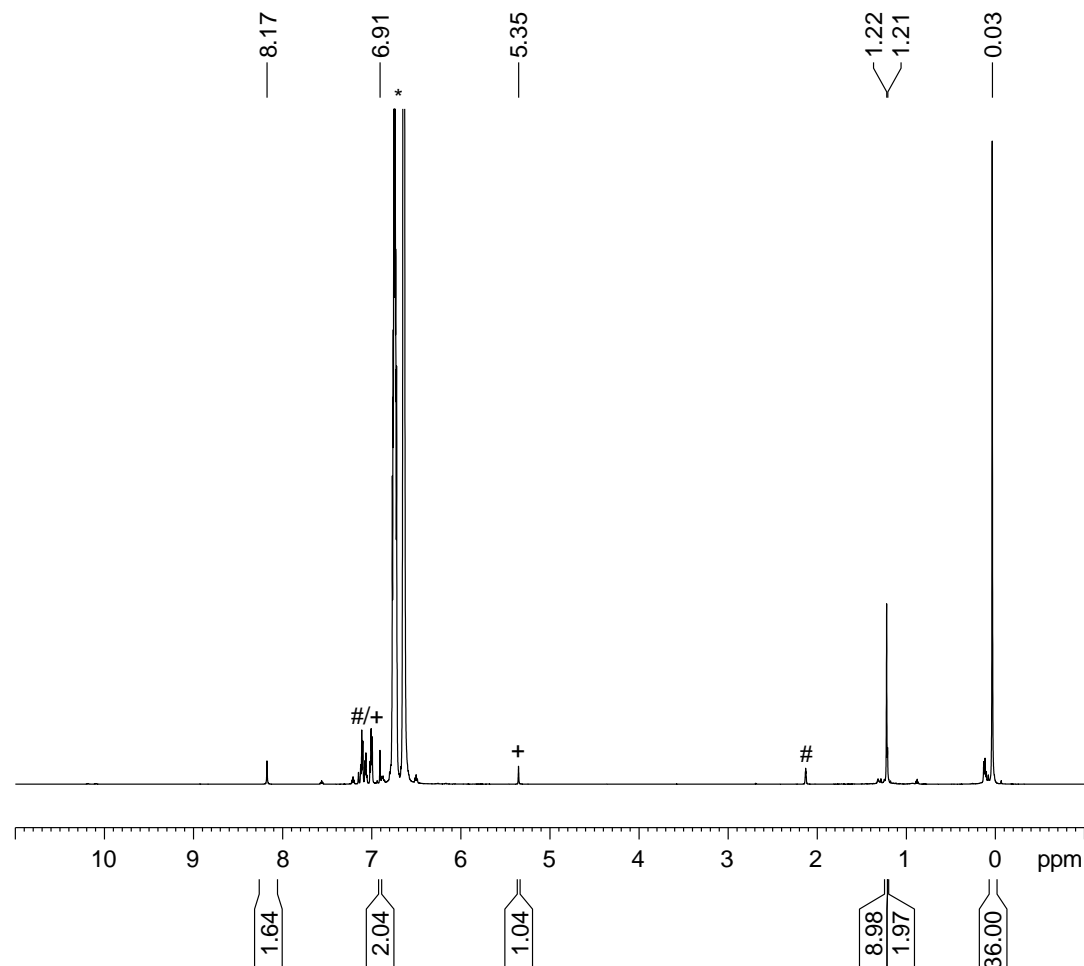

Current Data Parameters  
 NAME MA241\_18022020\_600TT  
 EXPNO 10  
 PROCNO 1

F2 - Acquisition Parameters  
 Date\_ 20200218  
 Time\_ 9.03 h  
 INSTRUM spect  
 PROBHD Z126545\_0027 (  
 PULPROG zg30  
 TD 65536  
 SOLVENT Tol  
 NS 32  
 DS 2  
 SWH 12019.230 Hz  
 FIDRES 0.366798 Hz  
 AQ 2.7262976 sec  
 RG 8.13  
 DW 41.600 usec  
 DE 10.00 usec  
 TE 234.1 K  
 D1 1.00000000 sec  
 TD0 1  
 SFO1 600.1337058 MHz  
 NUC1  $^1\text{H}$   
 P1 12.00 usec  
 PLW1 23.41200066 W

F2 - Processing parameters  
 SI 65536  
 SF 600.1300000 MHz  
 WDW EM  
 SSB 0  
 LB 0.30 Hz  
 GB 0  
 PC 1.00

Figure S57.  $^1\text{H-NMR}$  spectrum of compound 12.

$^{13}\text{C}\{^1\text{H}\}$ -NMR of  $[\text{TbbSnH}_2][\text{Al}(\text{OC}(\text{CF}_3)_3)_4]$  in toluene- $\text{d}_8$  (#) + 1,2-difluorobenzene (\*) at  $-40^\circ\text{C}$ , +:  $\text{HCPH}_3$

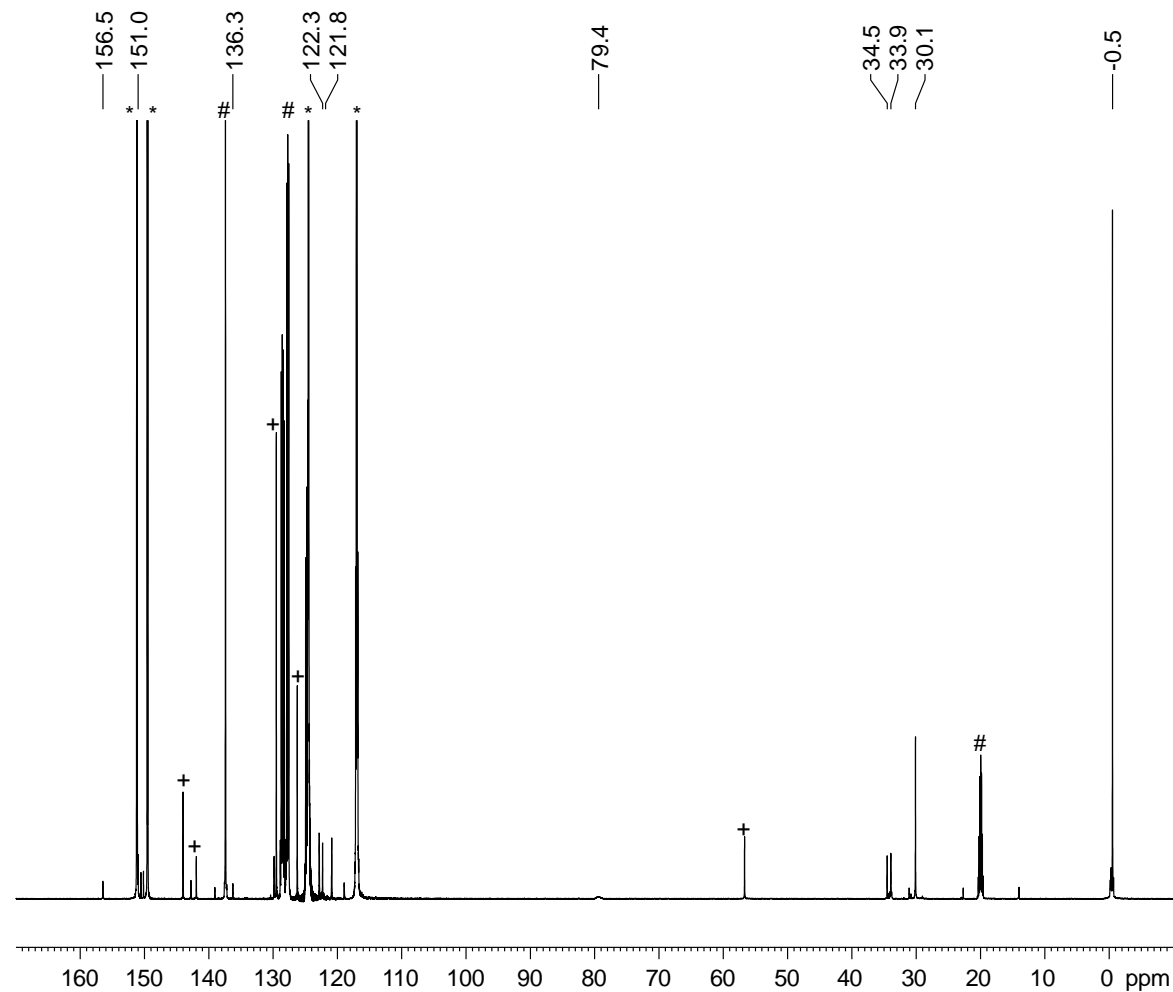

Current Data Parameters  
 NAME MA241\_18022020\_600T  
 EXPNO 11  
 PROCNO 1

F2 - Acquisition Parameters  
 Date\_ 20200218  
 Time 10.33 h  
 INSTRUM spect  
 PROBHD Z126545\_0027 (  
 PULPROG udef  
 TD 25902  
 SOLVENT Tol  
 NS 1024  
 DS 8  
 SWH 36231.883 Hz  
 FIDRES 2.797613 Hz  
 AQ 0.3574476 sec  
 RG 189.6  
 DW 13.800 usec  
 DE 18.00 usec  
 TE 234.1 K  
 D1 4.00000000 sec  
 D12 0.00002000 sec  
 D20 20.00000000 sec  
 TD0 1  
 SFO1 150.9178988 MHz  
 NUC1 13C  
 P1 10.00 usec  
 P13 2000.00 usec  
 P26 500.00 usec  
 PLW1 57.02700043 W  
 SPNAM[5] Crp60comp.4  
 SPOAL5 0.500  
 SPOFFS5 0 Hz  
 SPW5 8.71310043 W  
 SPNAM[8] Crp60.0.5.20.1  
 SPOAL8 0.500  
 SPOFFS8 0 Hz  
 SPW8 8.71310043 W  
 SFO2 600.1324005 MHz  
 NUC2 1H  
 CPDPRG[2] waltz16  
 PCPD2 70.00 usec  
 PLW2 23.41200066 W  
 PLW12 0.68803000 W

F2 - Processing parameters  
 SI 131072  
 SF 150.9028085 MHz  
 WDW EM  
 SSB 0  
 LB 2.00 Hz  
 GB 0  
 PC 1.40

Figure S58.  $^{13}\text{C}\{^1\text{H}\}$ -NMR spectrum of compound **12**.

$^{19}\text{F}\{^1\text{H}\}$ -NMR of  $[\text{TbbSnH}_2[\text{Al}(\text{OC}(\text{CF}_3)_3)_4]$  in toluene- $d_8$  + 1,2-difluorobenzene (#) at  $-40^\circ\text{C}$

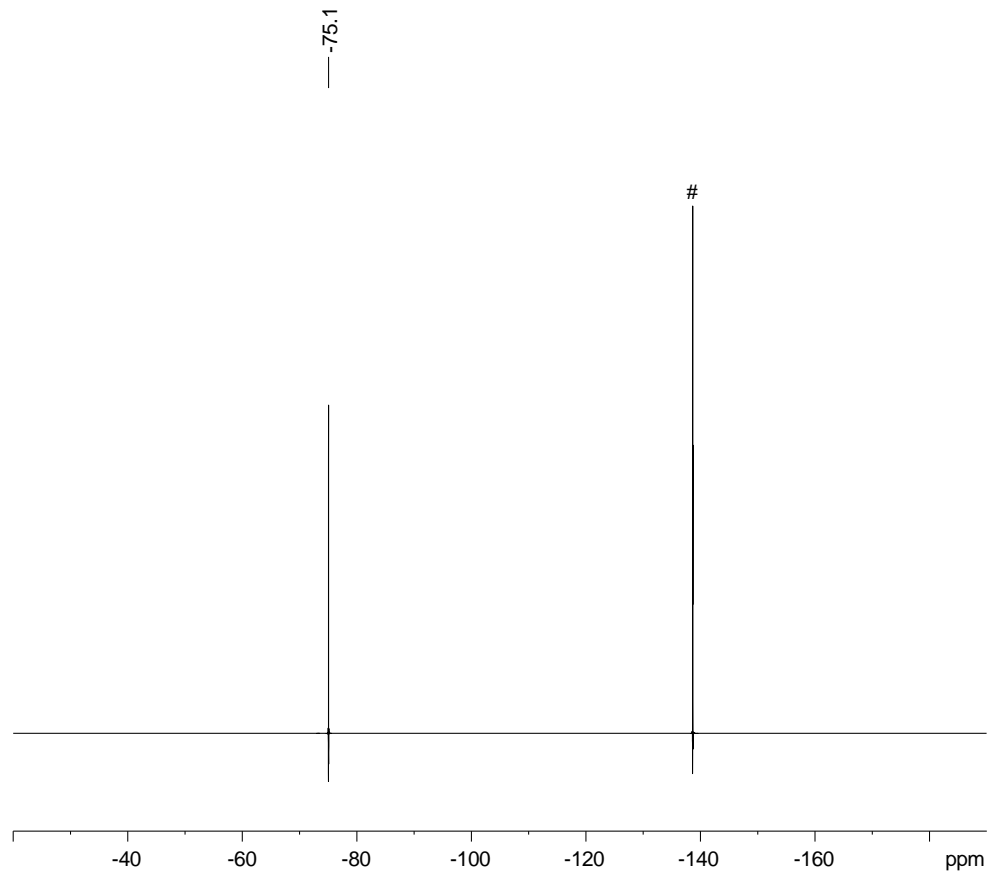

Current Data Parameters  
NAME MA241\_18022020\_600TT  
EXPNO 17  
PROCNO 1

F2 - Acquisition Parameters  
Date\_ 20200218  
Time 14.43 h  
INSTRUM spect  
PROBHD Z126545\_0027 (  
PULPROG zgfgqn  
TD 131072  
SOLVENT Tol  
NS 32  
DS 4  
SWH 133928.578 Hz  
FIDRES 2.043588 Hz  
AQ 0.4893355 sec  
RG 116.78  
DW 3.733 usec  
DE 18.00 usec  
TE 234.0 K  
D1 1.00000000 sec  
TD0 1  
SFO1 564.6299196 MHz  
NUC1  $^{19}\text{F}$   
P1 15.00 usec  
PLW1 27.71999931 W

F2 - Processing parameters  
SI 65536  
SF 564.6863882 MHz  
WDW EM  
SSB 0  
LB 0.30 Hz  
GB 0  
PC 1.00

Figure S59.  $^{19}\text{F}\{^1\text{H}\}$ -NMR spectrum of compound **12**.

$^{27}\text{Al}$ -NMR of  $[\text{TbSnH}_2][\text{Al}(\text{OC}(\text{CF}_3)_4)_4]$  in toluene- $d_8$  + 1,2-difluorobenzene at  $-40^\circ\text{C}$

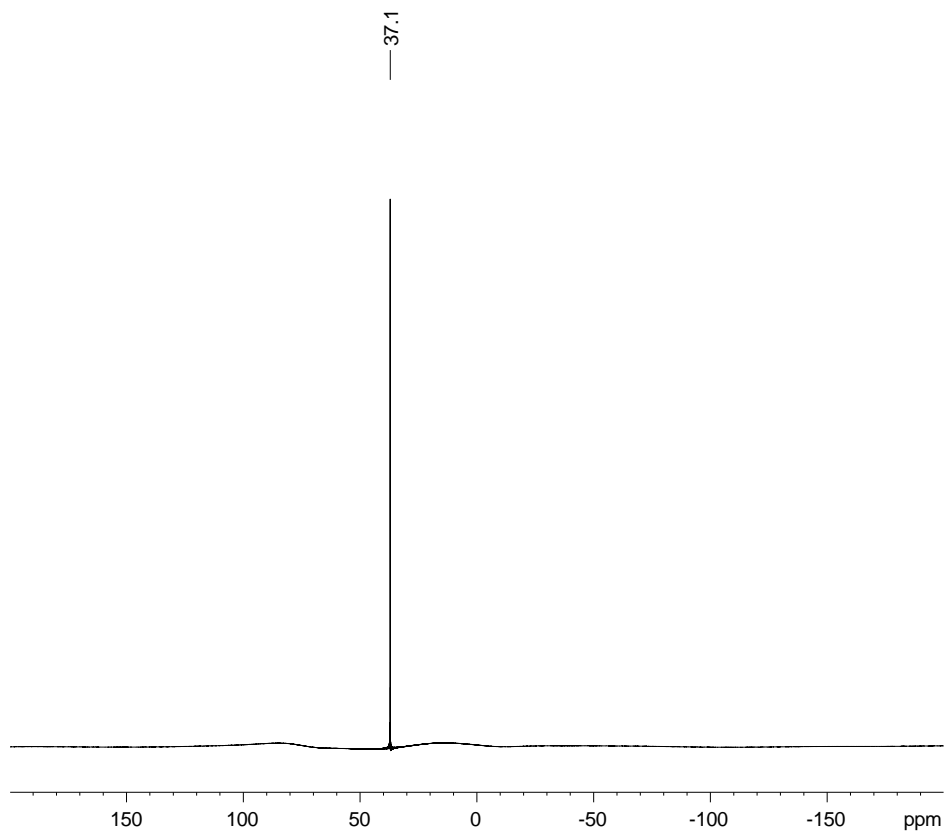

Current Data Parameters  
NAME MA241\_18022020\_600TT  
EXPNO 18  
PROCNO 1

F2 - Acquisition Parameters  
Date\_ 20200218  
Time 14.45 h  
INSTRUM spect  
PROBHD Z126545\_0027 (  
PULPROG zg  
TD 16384  
SOLVENT Tol  
NS 32  
DS 4  
SWH 62500.000 Hz  
FIDRES 7.629395 Hz  
AQ 0.1310720 sec  
RG 189.6  
DW 8.000 usec  
DE 18.00 usec  
TE 233.9 K  
D1 1.00000000 sec  
TD0 1  
SFO1 156.3750279 MHz  
NUC1  $^{27}\text{Al}$   
P1 11.50 usec  
PLW1 60.00000000 W

F2 - Processing parameters  
SI 32768  
SF 156.3750279 MHz  
WDW EM  
SSB 0  
LB 1.00 Hz  
GB 0  
PC 1.40

Figure S60.  $^{27}\text{Al}$ -NMR spectrum of compound **12**.

$^{29}\text{Si}$ -INEPTND-NMR of  $[\text{TbbSnH}_2][\text{Al}(\text{OC}(\text{CF}_3)_3)_4]$  in toluene- $d_8$  + 1,2-difluorobenzene at  $-40^\circ\text{C}$

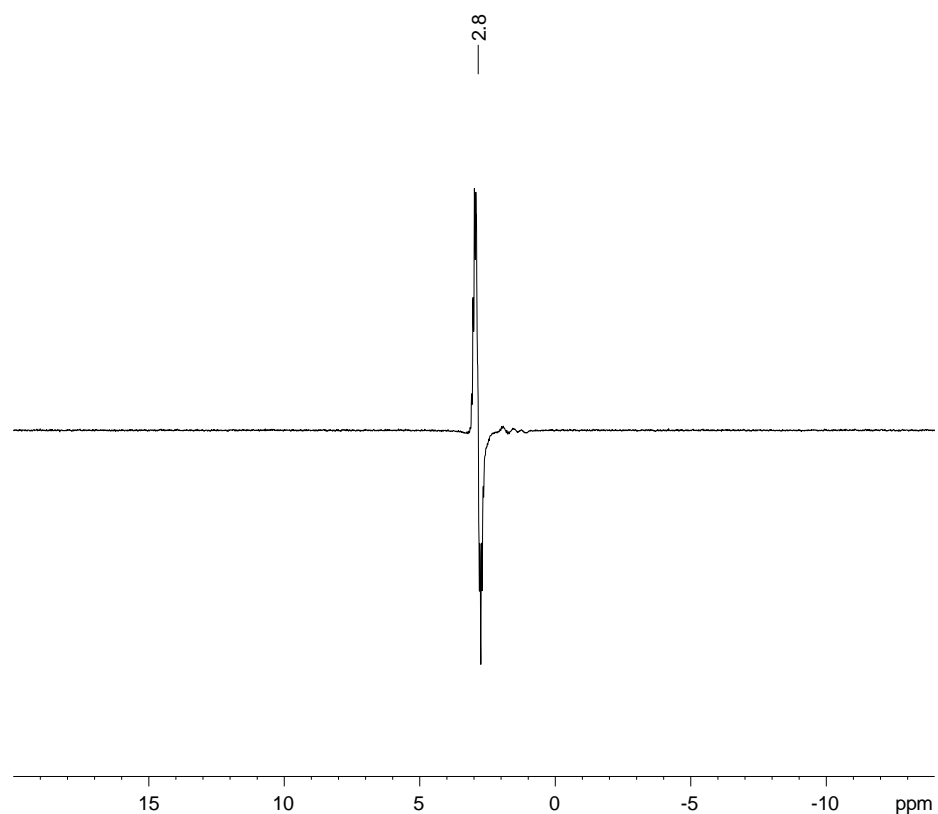

Current Data Parameters  
NAME MA241\_18022020\_600TT  
EXPNO 16  
PROCNO 1

F2 - Acquisition Parameters  
Date\_ 20200218  
Time 14.40 h  
INSTRUM spect  
PROBHD Z126545\_0027 (  
PULPROG ineptnd  
TD 16384  
SOLVENT Tol  
NS 128  
DS 16  
SWH 19132.652 Hz  
FIDRES 2.335529 Hz  
AQ 0.4281685 sec  
RG 189.6  
DW 26.133 usec  
DE 18.00 usec  
TE 233.9 K  
CNST2 6.5999999  
D1 5.0000000 sec  
D4 0.03787879 sec  
TD0 1  
SFO1 119.2289493 MHz  
NUC1  $^{29}\text{Si}$   
P1 14.50 usec  
P2 29.00 usec  
PLW1 50.0000000 W  
SFO2 600.1324005 MHz  
NUC2  $^1\text{H}$   
P3 12.00 usec  
P4 24.00 usec  
PLW2 23.41200066 W

F2 - Processing parameters  
SI 32768  
SF 119.2289493 MHz  
WDW EM  
SSB 0  
LB 1.00 Hz  
GB 0  
PC 4.00

Figure S61.  $^{29}\text{Si}$ -INEPTND-NMR spectrum of compound **12**.

$^{119}\text{Sn}$ -NMR of  $[\text{TbbSnH}_2][\text{Al}(\text{OC}(\text{CF}_3)_3)_4]$  in toluene- $d_8$  + 1,2-difluorobenzene at  $-40\text{ }^\circ\text{C}$

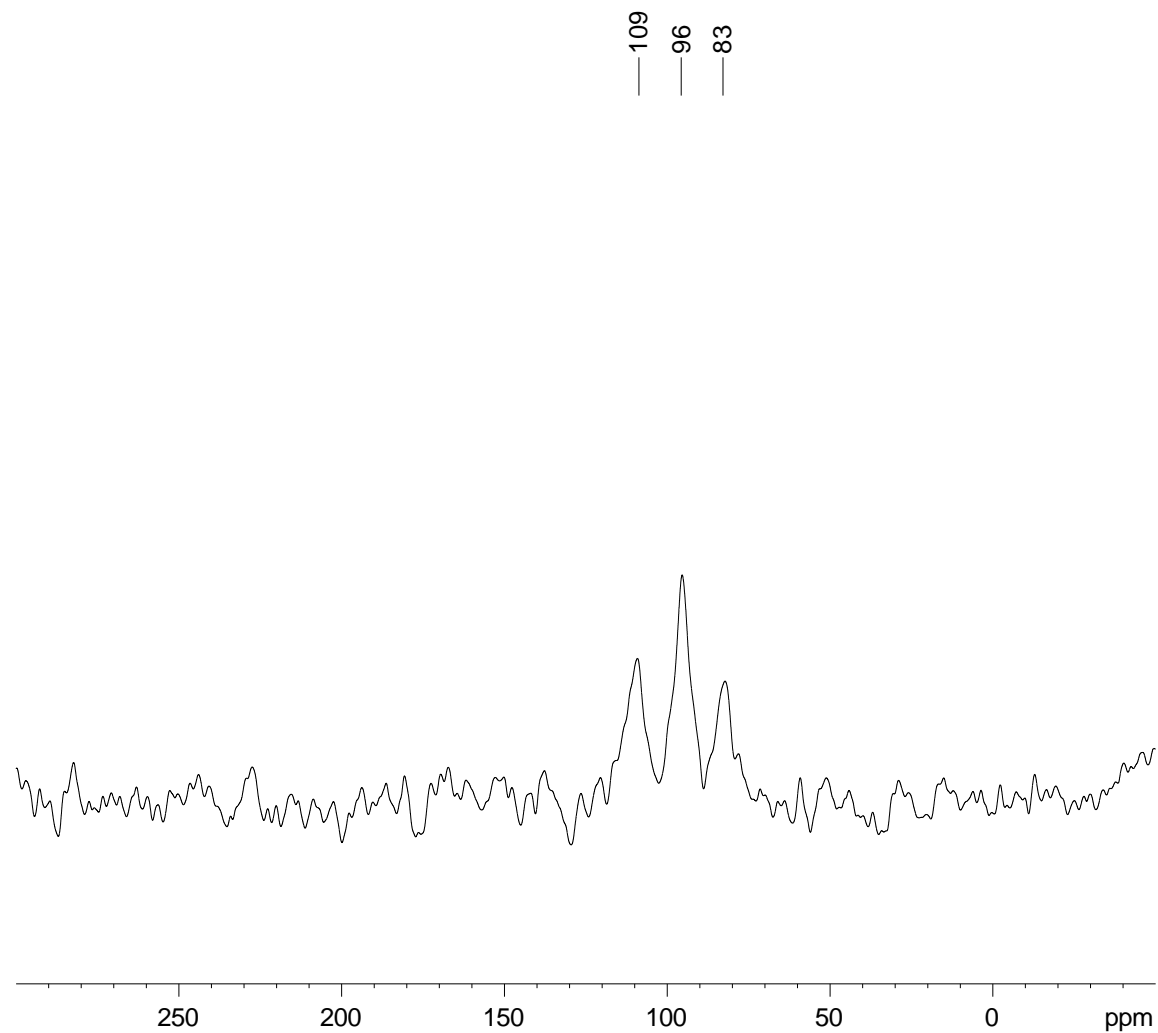

Current Data Parameters  
NAME MA241\_17022020\_500TT  
EXPNO 8  
PROCNO 1

F2 - Acquisition Parameters  
Date\_ 20200217  
Time 12.14  
INSTRUM spect  
PROBHD 5 mm TBO BB-1H  
PULPROG zg30  
TD 65536  
SOLVENT Tol  
NS 32893  
DS 0  
SWH 93750.000 Hz  
FIDRES 1.430511 Hz  
AQ 0.3495253 sec  
RG 2050  
DW 5.333 usec  
DE 6.00 usec  
TE 233.1 K  
D1 0.20000000 sec  
TD0 1

===== CHANNEL f1 =====  
NUC1 119Sn  
P1 11.93 usec  
PL1 3.00 dB  
PL1W 45.32131577 W  
SFO1 186.5389383 MHz

F2 - Processing parameters  
SI 131072  
SF 186.5016380 MHz  
WDW EM  
SSB 0  
LB 350.00 Hz  
GB 0  
PC 1.40

Figure S62.  $^{119}\text{Sn}$ -NMR spectrum of compound **12**.



$^{119}\text{Sn}\{^1\text{H}\}$ -NMR of  $[\text{TbbSnH}_2][\text{Al}(\text{OC}(\text{CF}_3)_3)_4]$  in toluene- $d_8$  + 1,2-difluorobenzene at  $-40^\circ\text{C}$

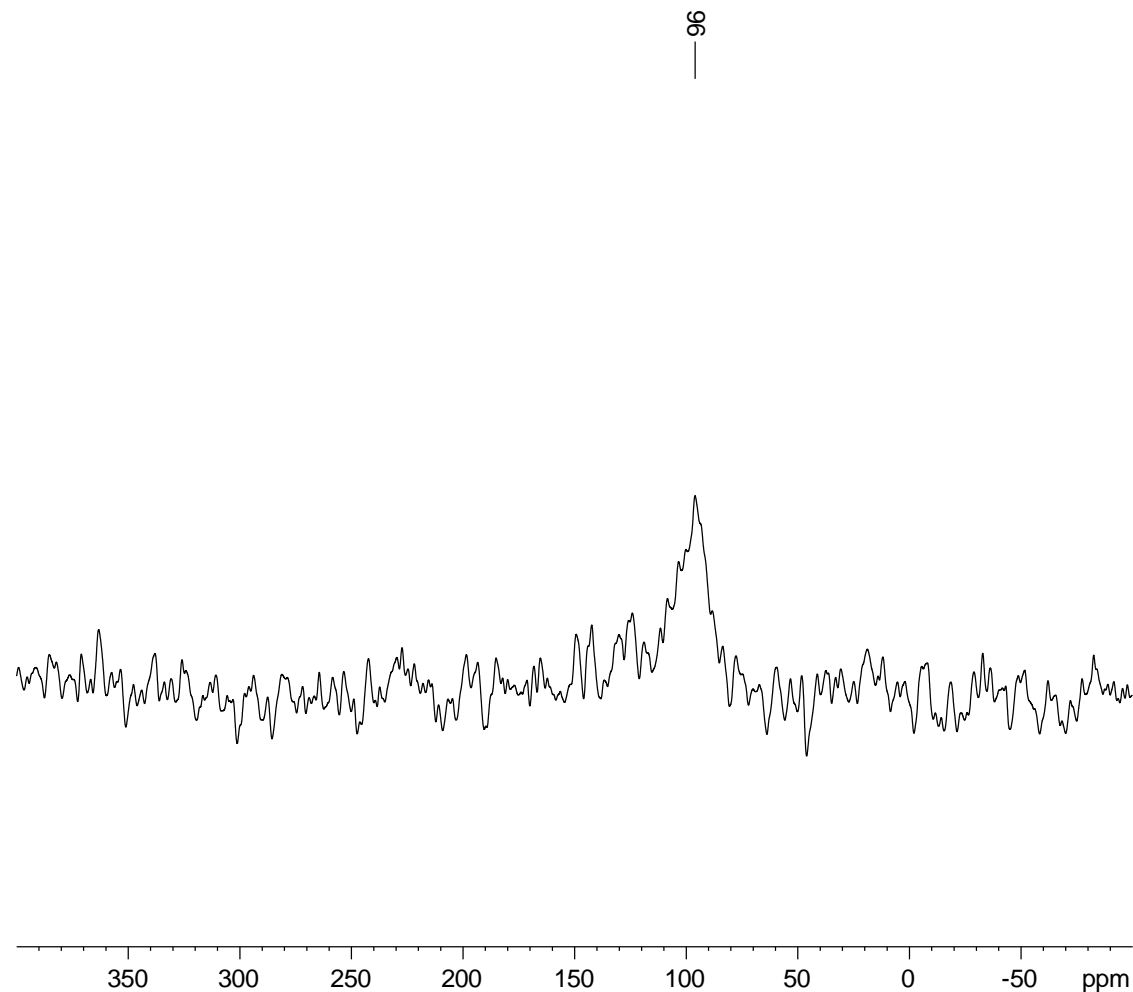

Current Data Parameters  
NAME MA241\_24022020\_500  
EXPNO 5  
PROCNO 1

F2 - Acquisition Parameters  
Date\_ 20200224  
Time 15.11  
INSTRUM spect  
PROBHD 5 mm TBO BB-1H  
PULPROG zgig30  
TD 65536  
SOLVENT Tol  
NS 16279  
DS 0  
SWH 150000.000 Hz  
FIDRES 2.288818 Hz  
AQ 0.2184533 sec  
RG 2050  
DW 3.333 usec  
DE 6.00 usec  
TE 233.4 K  
D1 0.20000000 sec  
D11 0.03000000 sec  
TD0 1

==== CHANNEL f1 =====  
NUC1 119Sn  
P1 11.93 usec  
PL1 3.00 dB  
PL1W 45.32131577 W  
SFO1 186.5296132 MHz

==== CHANNEL f2 =====  
CPDPRG[2] waltz16  
NUC2 1H  
PCPD2 80.00 usec  
PL2 -0.52 dB  
PL12 15.00 dB  
PL2W 24.34997177 W  
PL12W 0.68312228 W  
SFO2 500.1320005 MHz

F2 - Processing parameters  
SI 65536  
SF 186.5016380 MHz  
WDW EM  
SSB 0  
LB 350.00 Hz  
GB 0  
PC 1.40

Figure S63.  $^{119}\text{Sn}\{^1\text{H}\}$ -NMR spectrum of compound **12**.

NMR spectra of compound **13**

$^1\text{H}$ -NMR of  $[\text{TbbSnH}_2(\text{thf})_2][\text{Al}(\text{OC}(\text{CF}_3)_3)_4]$  in  $\text{C}_6\text{D}_6$  (#) + 1,2-difluorobenzene (\*) at rt

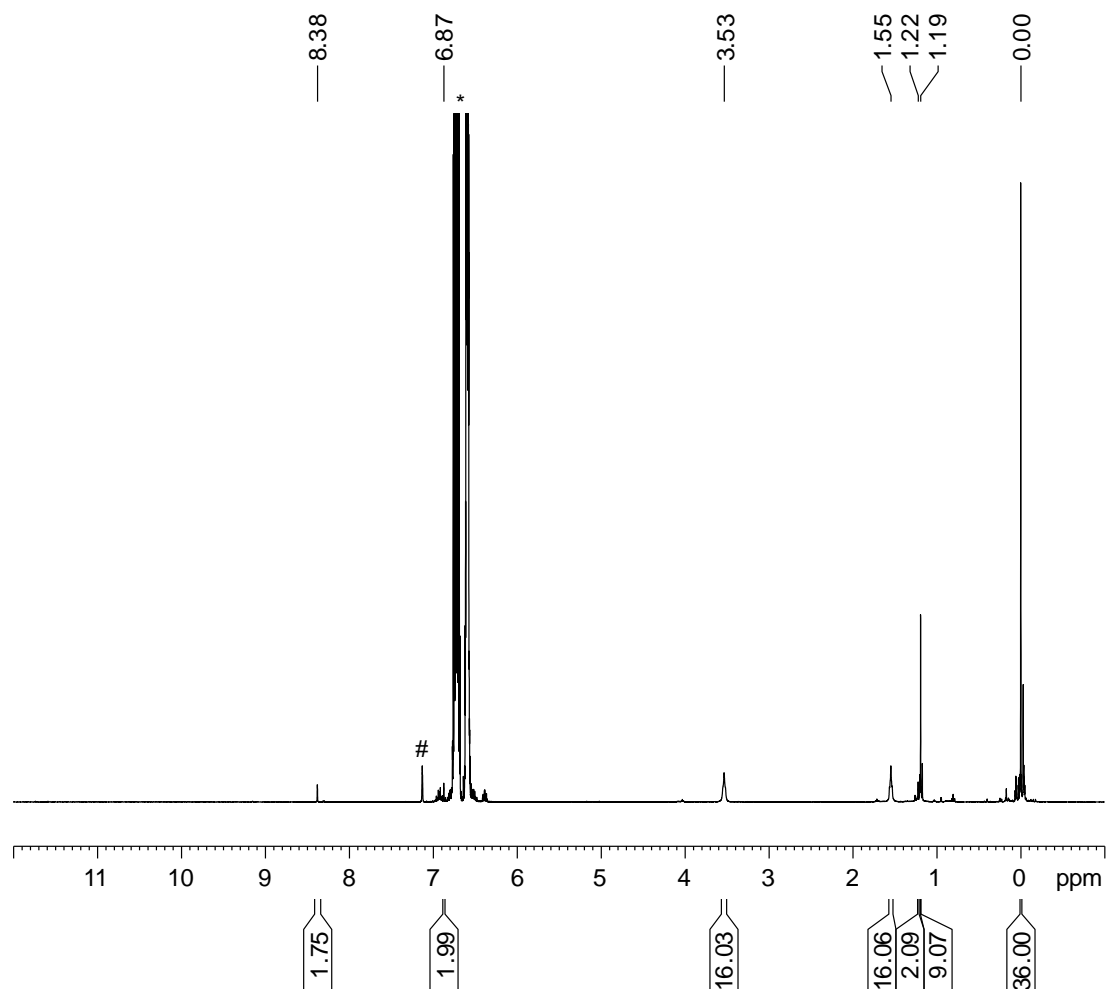

Current Data Parameters  
NAME MA246\_08042020\_400N  
EXPNO 16  
PROCNO 1

F2 - Acquisition Parameters  
Date\_ 20200409  
Time 7.33  
INSTRUM spect  
PROBHD 5 mm QNP 1H/13  
PULPROG zg30  
TD 52656  
SOLVENT C6D6  
NS 32  
DS 0  
SWH 8305.647 Hz  
FIDRES 0.157734 Hz  
AQ 3.1698911 sec  
RG 71.8  
DW 60.200 usec  
DE 6.00 usec  
TE 299.2 K  
D1 1.00000000 sec  
TD0 1

==== CHANNEL f1 =====  
NUC1 1H  
P1 14.60 usec  
PL1 -3.00 dB  
PL1W 16.03799057 W  
SFO1 400.1120007 MHz

F2 - Processing parameters  
SI 65536  
SF 400.1100032 MHz  
WDW EM  
SSB 0  
LB 0 Hz  
GB 0  
PC 1.00

Figure S64.  $^1\text{H}$ -NMR spectrum of compound **13**.

$^{13}\text{C}\{^1\text{H}\}$ -NMR of  $[\text{TbbSnH}_2(\text{thf})_2][\text{Al}(\text{OC}(\text{CF}_3)_3)_4]$  in  $\text{C}_6\text{D}_6$  (#) + 1,2-difluorobenzene (\*) at rt

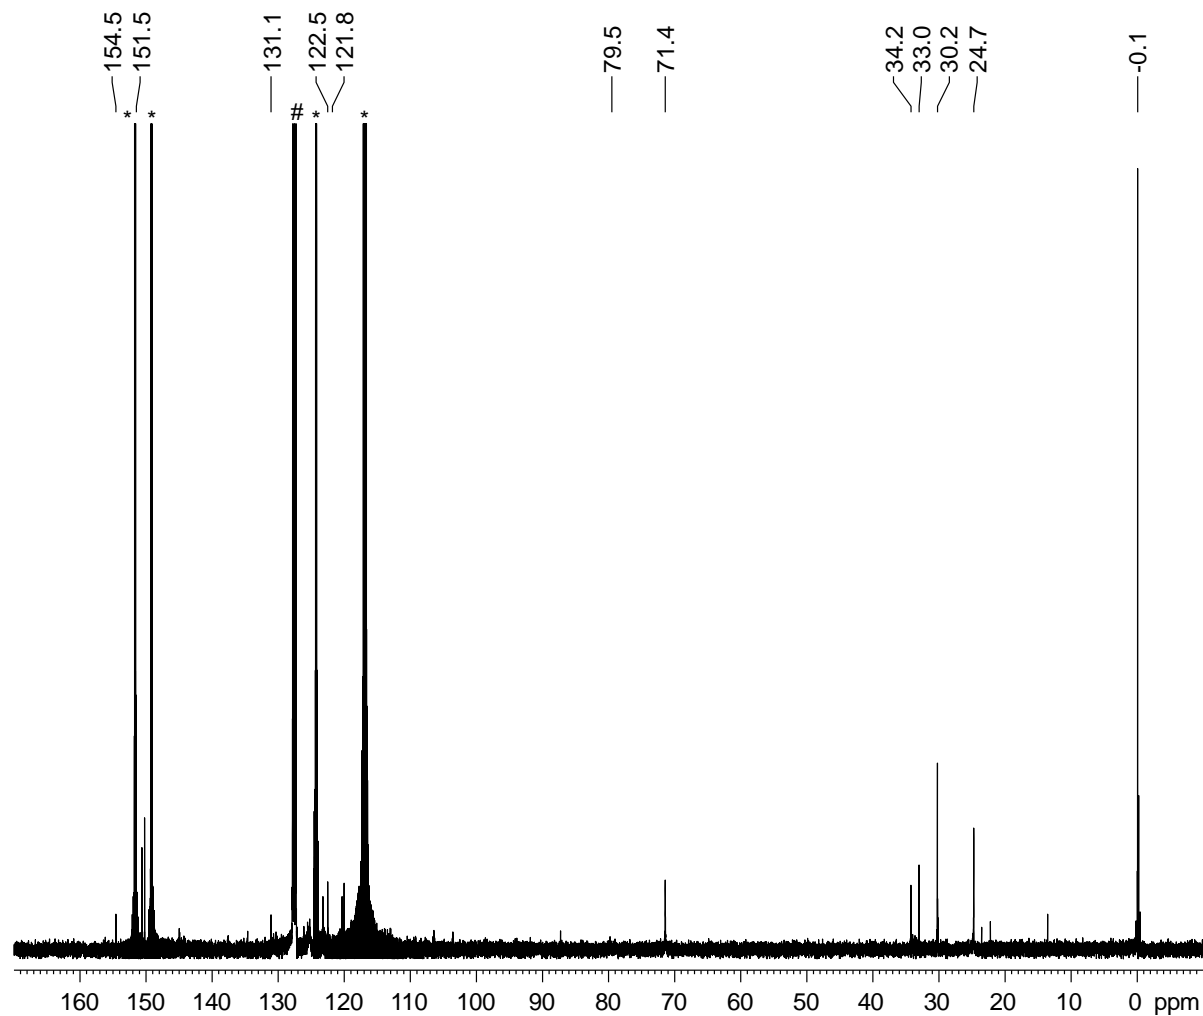

Current Data Parameters  
 NAME MA246\_08042020\_400N  
 EXPNO 11  
 PROCNO 1

F2 - Acquisition Parameters  
 Date\_ 20200409  
 Time 2.07  
 INSTRUM spect  
 PROBHD 5 mm QNP 1H/13  
 PULPROG zgpg30  
 TD 53700  
 SOLVENT C6D6  
 NS 11264  
 DS 0  
 SWH 30864.197 Hz  
 FIDRES 0.574752 Hz  
 AQ 0.8699400 sec  
 RG 32800  
 DW 16.200 usec  
 DE 6.00 usec  
 TE 299.2 K  
 D1 1.00000000 sec  
 D11 0.03000000 sec  
 TD0 1

===== CHANNEL f1 =====  
 NUC1 13C  
 P1 13.50 usec  
 PL1 -4.16 dB  
 PL1W 78.55633545 W  
 SFO1 100.6198135 MHz

===== CHANNEL f2 =====  
 CPDPRG[2] waltz16  
 NUC2 1H  
 PCPD2 80.00 usec  
 PL2 -3.00 dB  
 PL12 11.77 dB  
 PL13 13.14 dB  
 PL2W 16.03799057 W  
 PL12W 0.53474891 W  
 PL13W 0.39007664 W  
 SFO2 400.1120007 MHz

F2 - Processing parameters  
 SI 65536  
 SF 100.6077400 MHz  
 WDW EM  
 SSB 0  
 LB 0 Hz  
 GB 0  
 PC 1 40

Figure S65.  $^{13}\text{C}\{^1\text{H}\}$ -NMR spectrum of compound **13**.

$^{19}\text{F}\{^1\text{H}\}$ -NMR of  $[\text{TbbSnH}_2(\text{thf})_2][\text{Al}(\text{OC}(\text{CF}_3)_3)_4]$  in  $\text{C}_6\text{D}_6$  + 1,2-difluorobenzene (#) at rt

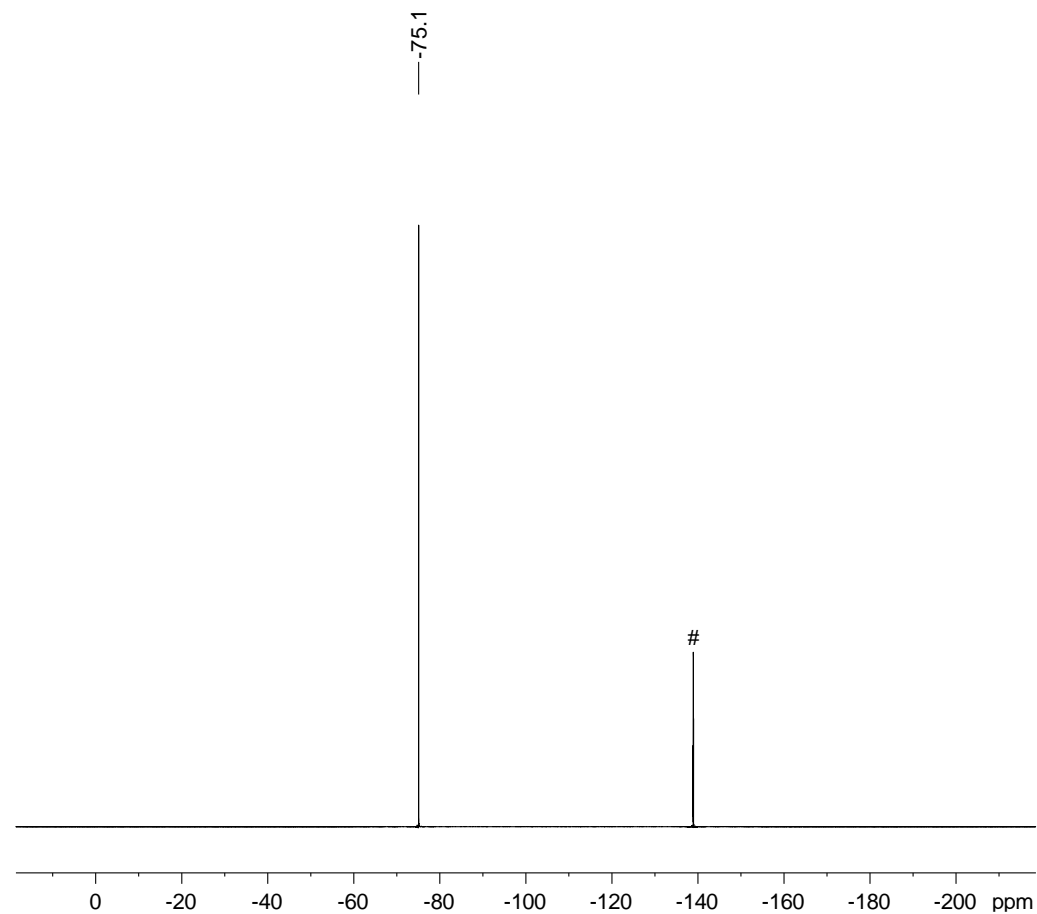

Figure S66.  $^{19}\text{F}\{^1\text{H}\}$ -NMR spectrum of compound **13**.

Current Data Parameters  
NAME MA246\_08042020\_300  
EXPNO 11  
PROCNO 1

F2 - Acquisition Parameters  
Date\_ 20200408  
Time 8.06 h  
INSTRUM spect  
PROBHD Z104275\_0338 (  
PULPROG zgbs  
TD 262144  
SOLVENT C6D6  
NS 16  
DS 4  
SWH 66964.289 Hz  
FIDRES 0.510897 Hz  
AQ 1.9573419 sec  
RG 204.67  
DW 7.467 usec  
DE 6.50 usec  
TE 298.0 K  
D1 1.00000000 sec  
TD0 1  
SFO1 282.3761148 MHz  
NUC1 19F  
P1 15.00 usec  
P2 30.00 usec  
PLW1 6.86250019 W

F2 - Processing parameters  
SI 65536  
SF 282.4043552 MHz  
WDW EM  
SSB 0  
LB 0.30 Hz  
GB 0  
PC 1.00

$^{27}\text{Al}$ -NMR of  $[\text{TbbSnH}_2(\text{thf})_2][\text{Al}(\text{OC}(\text{CF}_3)_3)_4]$  in  $\text{C}_6\text{D}_6$  + 1,2-difluorobenzene at rt

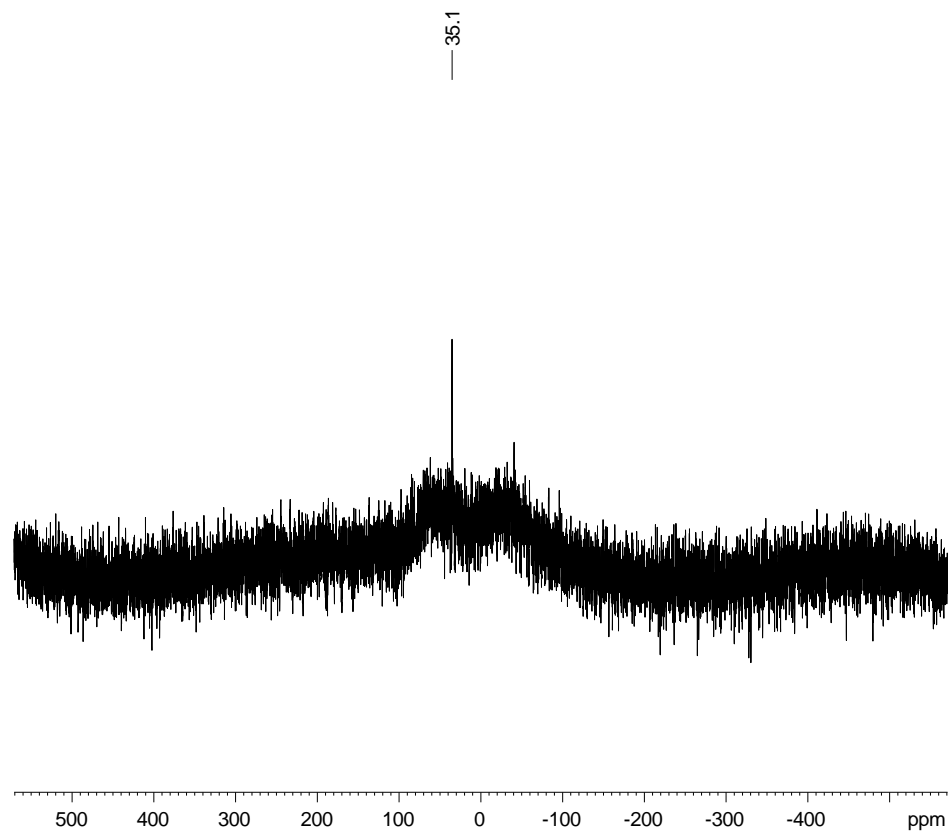

Current Data Parameters  
NAME MA246\_08042020\_300  
EXPNO 12  
PROCNO 1

F2 - Acquisition Parameters  
Date\_ 20200408  
Time 8.08 h  
INSTRUM spect  
PROBHD Z104275\_0338 (  
PULPROG zg30  
TD 16384  
SOLVENT C6D6  
NS 512  
DS 0  
SWH 89285.711 Hz  
FIDRES 10.899135 Hz  
AQ 0.0917504 sec  
RG 204.67  
DW 5.600 usec  
DE 6.50 usec  
TE 298.0 K  
D1 0.10000000 sec  
TD0 1  
SFO1 78.2044509 MHz  
NUC1 27Al  
P0 3.40 usec  
P1 10.19 usec  
PLW1 34.00000000 W

F2 - Processing parameters  
SI 32768  
SF 78.2044509 MHz  
WDW EM  
SSB 0  
LB 5.00 Hz  
GB 0  
PC 1.40

Figure S67.  $^{27}\text{Al}$ -NMR spectrum of compound **13**.

$^{119}\text{Sn}$ -NMR of  $[\text{TbbSnH}_2(\text{thf})_2][\text{Al}(\text{OC}(\text{CF}_3)_3)_4]$  in toluene- $d_8$  + 1,2-difluorobenzene at rt

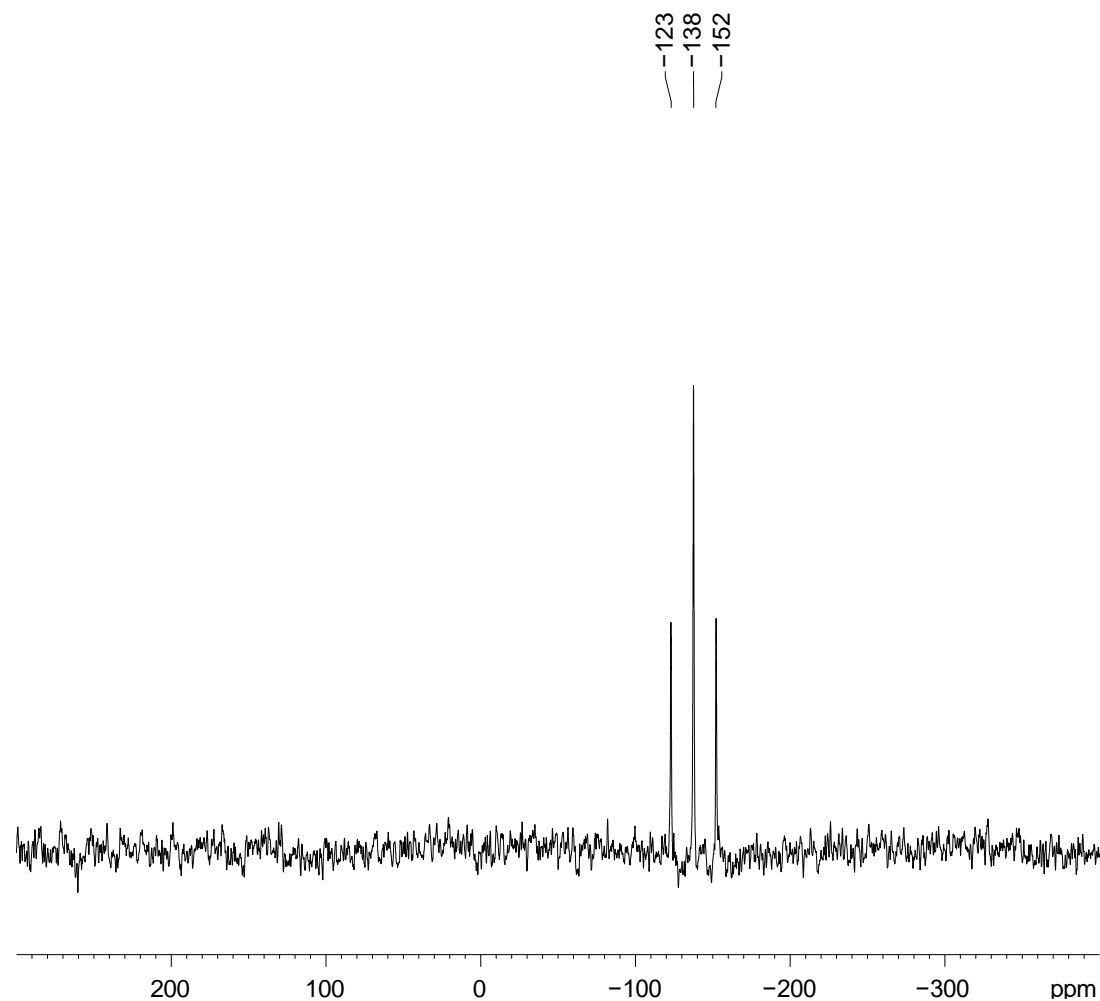

Current Data Parameters  
NAME MA242\_24022020\_500  
EXPNO 2  
PROCNO 1

F2 - Acquisition Parameters  
Date\_ 20200225  
Time 1.55  
INSTRUM spect  
PROBHD 5 mm TBO BB-1H  
PULPROG zg30  
TD 65536  
SOLVENT Tol  
NS 65000  
DS 0  
SWH 150000.000 Hz  
FIDRES 2.288818 Hz  
AQ 0.2184533 sec  
RG 2050  
DW 3.333 usec  
DE 6.00 usec  
TE 299.2 K  
D1 0.20000000 sec  
TD0 1

==== CHANNEL f1 =====  
NUC1 119Sn  
P1 11.93 usec  
PL1 3.00 dB  
PL1W 45.32131577 W  
SFO1 186.5016380 MHz

F2 - Processing parameters  
SI 131072  
SF 186.5016380 MHz  
WDW EM  
SSB 0  
LB 100.00 Hz  
GB 0  
PC 1.40

Figure S68.  $^{119}\text{Sn}$ -NMR spectrum of compound **13**.

$^{119}\text{Sn}\{^1\text{H}\}$ -NMR of  $[\text{TbbSnH}_2(\text{thf})_2][\text{Al}(\text{OC}(\text{CF}_3)_3)_4]$  in toluene- $d_8$  + 1,2-difluorobenzene at rt

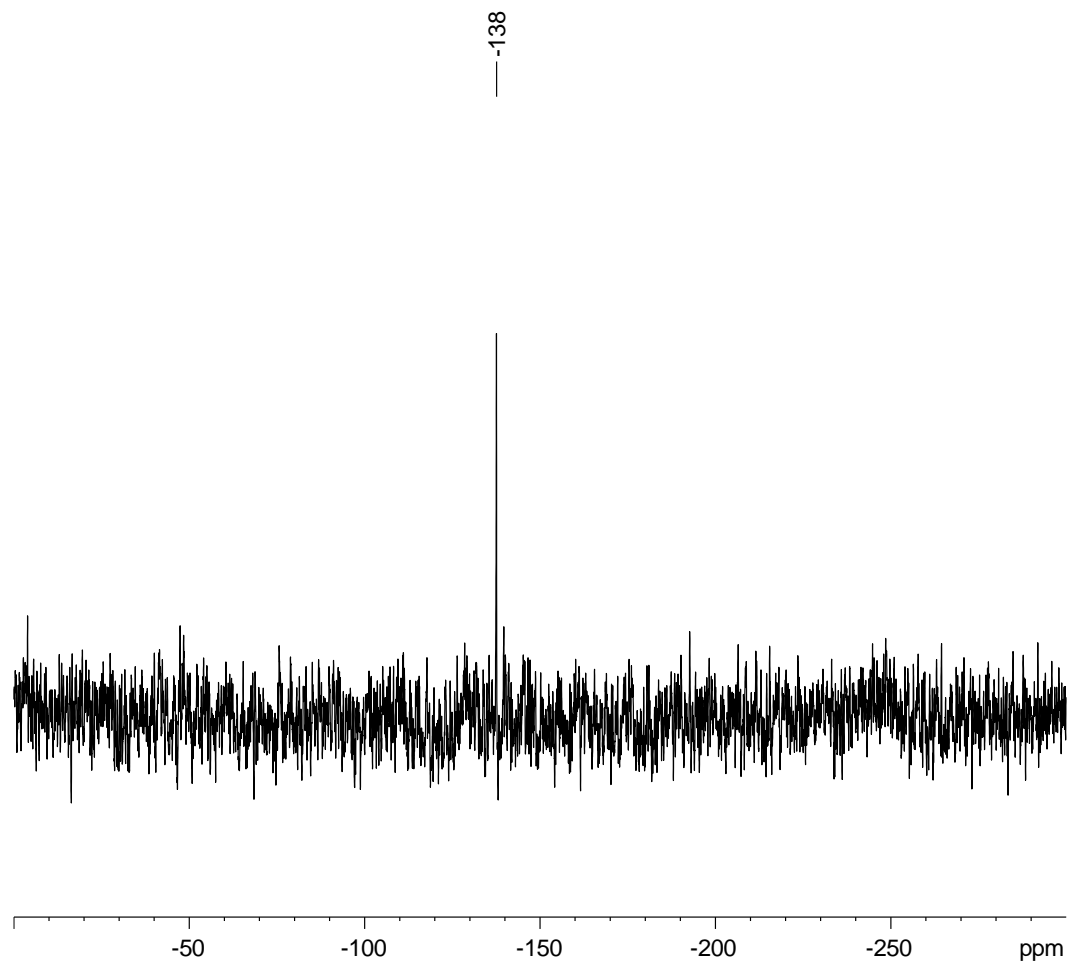

Current Data Parameters  
NAME MA242\_24022020\_500  
EXPNO 3  
PROCNO 1

F2 - Acquisition Parameters  
Date\_ 20200225  
Time 8.12  
INSTRUM spect  
PROBHD 5 mm TBO BB-1H  
PULPROG zgig30  
TD 65536  
SOLVENT Tol  
NS 50000  
DS 0  
SWH 150000.000 Hz  
FIDRES 2.288818 Hz  
AQ 0.2184533 sec  
RG 2050  
DW 3.333 usec  
DE 6.00 usec  
TE 299.2 K  
D1 0.20000000 sec  
D11 0.03000000 sec  
TD0 1

===== CHANNEL f1 =====  
NUC1 119Sn  
P1 11.93 usec  
PL1 3.00 dB  
PL1W 45.32131577 W  
SFO1 186.5016380 MHz

===== CHANNEL f2 =====  
CPDPRG[2] waltz16  
NUC2 1H  
PCPD2 80.00 usec  
PL2 -0.52 dB  
PL12 15.00 dB  
PL2W 24.34997177 W  
PL12W 0.68312228 W  
SFO2 500.1320005 MHz

F2 - Processing parameters  
SI 65536  
SF 186.5016380 MHz  
WDW EM  
SSB 0  
LB 50.00 Hz  
GB 0  
PC 1.40

Figure S69.  $^{119}\text{Sn}\{^1\text{H}\}$ -NMR spectrum of compound **13**.

# NMR spectra of compound **14**

$^1\text{H-NMR}$  of  $[\text{TbbSnH}_2]_2$  in toluene- $d_8$  (#) at rt

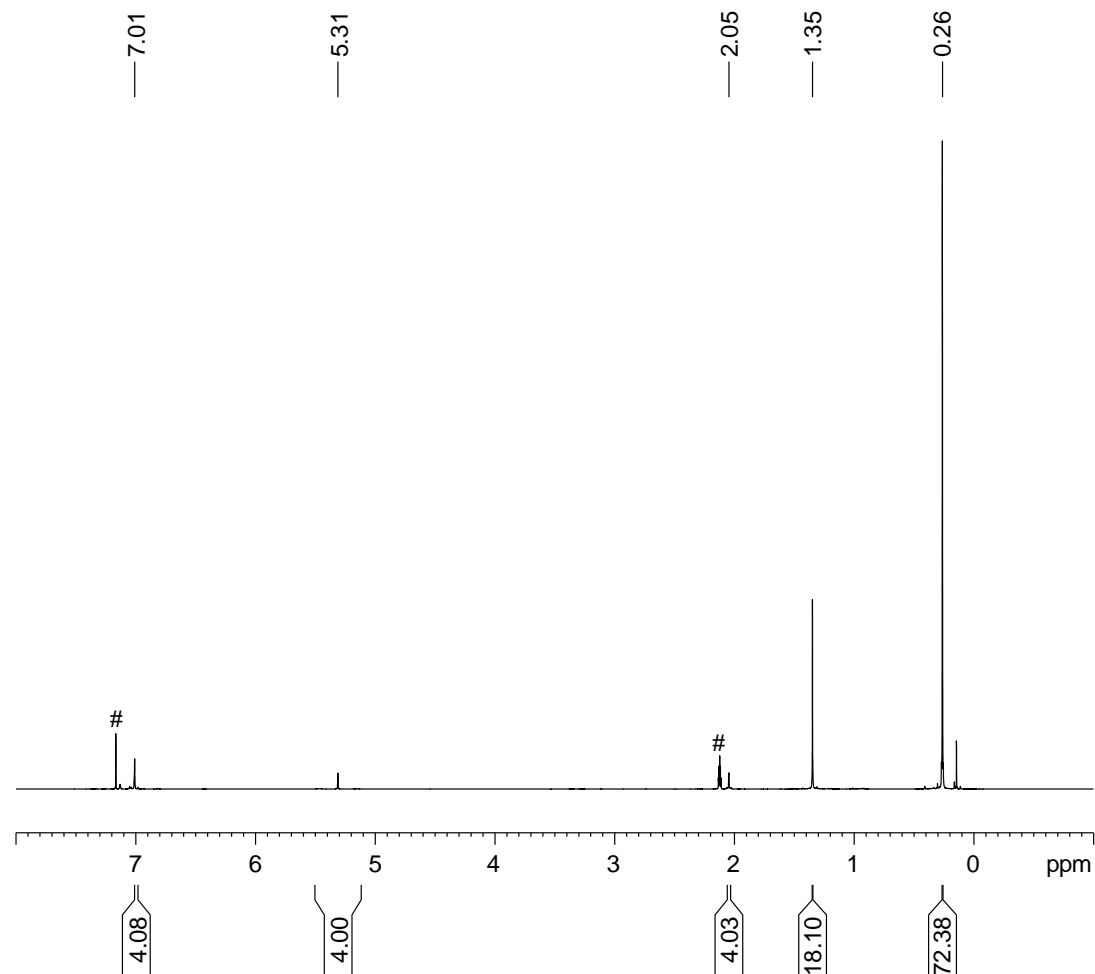

Current Data Parameters  
 NAME MA263\_06042020\_400N  
 EXPNO 11  
 PROCNO 1

F2 - Acquisition Parameters  
 Date\_ 20200406  
 Time 20.05  
 INSTRUM spect  
 PROBHD 5 mm QNP 1H/13  
 PULPROG zg30  
 TD 52656  
 SOLVENT Tol  
 NS 32  
 DS 0  
 SWH 8305.647 Hz  
 FIDRES 0.157734 Hz  
 AQ 3.1698911 sec  
 RG 287  
 DW 60.200 usec  
 DE 6.00 usec  
 TE 299.2 K  
 D1 1.00000000 sec  
 TD0 1

==== CHANNEL f1 =====  
 NUC1 1H  
 P1 14.60 usec  
 PL1 -3.00 dB  
 PL1W 16.03799057 W  
 SFO1 400.1120007 MHz

F2 - Processing parameters  
 SI 65536  
 SF 400.1100000 MHz  
 WDW EM  
 SSB 0  
 LB 0 Hz  
 GB 0  
 PC 1.00

Figure S70.  $^1\text{H-NMR}$  spectrum of compound **14**.



$^{13}\text{C}\{^1\text{H}\}$ -NMR of  $[\text{TbbSnH}_2]_2$  in toluene- $d_8$  (#) at rt

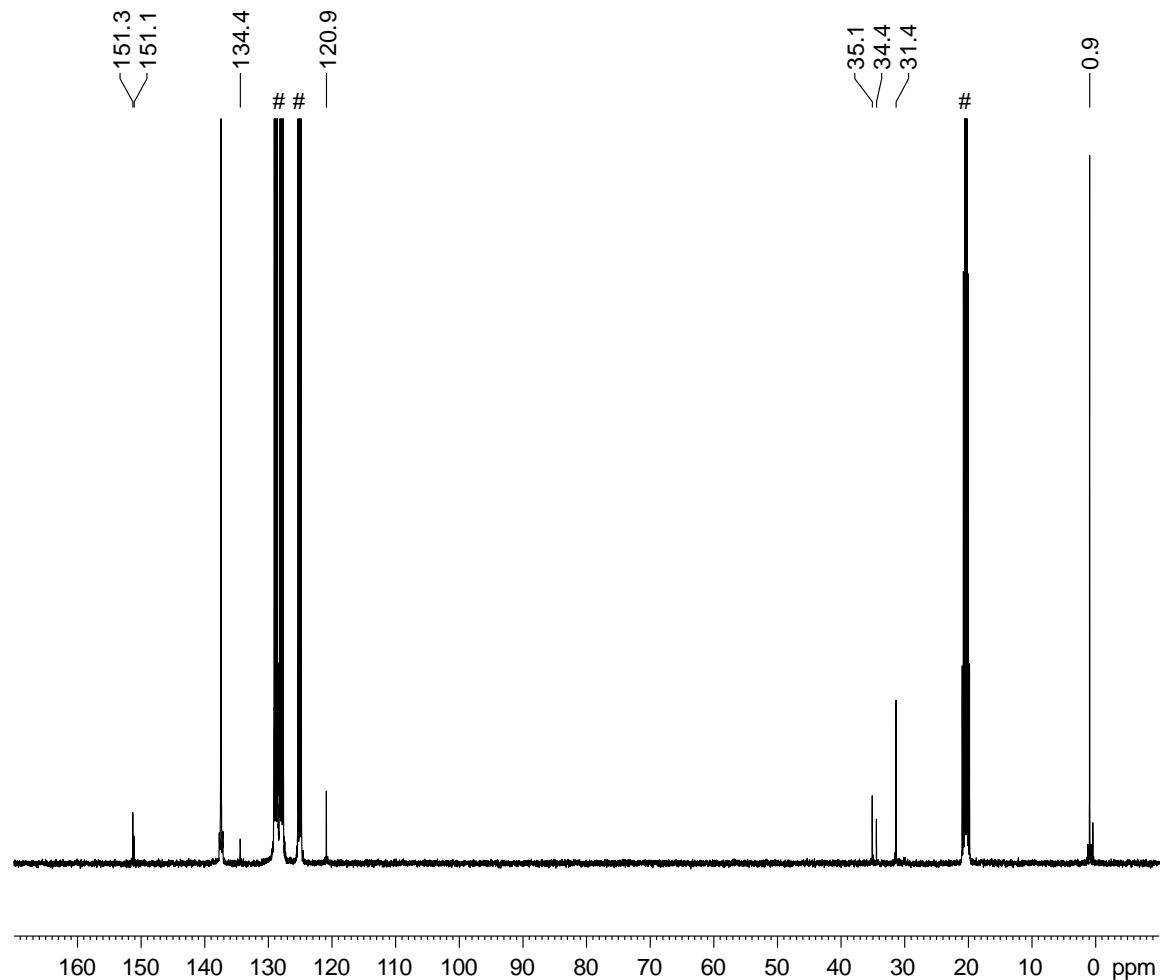

Current Data Parameters  
NAME MA263\_06042020\_400N  
EXPNO 12  
PROCNO 1

F2 - Acquisition Parameters  
Date\_ 20200407  
Time 2.09  
INSTRUM spect  
PROBHD 5 mm QNP 1H/13  
PULPROG zgpg30  
TD 53700  
SOLVENT Tol  
NS 11264  
DS 0  
SWH 30864.197 Hz  
FIDRES 0.574752 Hz  
AQ 0.8699400 sec  
RG 32800  
DW 16.200 usec  
DE 6.00 usec  
TE 299.2 K  
D1 1.00000000 sec  
D11 0.03000000 sec  
TD0 1

===== CHANNEL f1 =====  
NUC1 13C  
P1 13.50 usec  
PL1 -4.16 dB  
PL1W 78.55633545 W  
SFO1 100.6198135 MHz

===== CHANNEL f2 =====  
CPDPRG[2] waltz16  
NUC2 1H  
PCPD2 80.00 usec  
PL2 -3.00 dB  
PL12 11.77 dB  
PL13 13.14 dB  
PL2W 16.03799057 W  
PL12W 0.53474891 W  
PL13W 0.39007664 W  
SFO2 400.1120007 MHz

F2 - Processing parameters  
SI 65536  
SF 100.6077048 MHz  
WDW EM  
SSB 0  
LB 1.00 Hz  
GB 0  
PC 1.40

Figure S71.  $^{13}\text{C}\{^1\text{H}\}$ -NMR spectrum of compound **14**.

$^{29}\text{Si}$ -INEPTND-NMR of  $[\text{TbbSnH}_2]_2$  in toluene- $d_8$  at rt

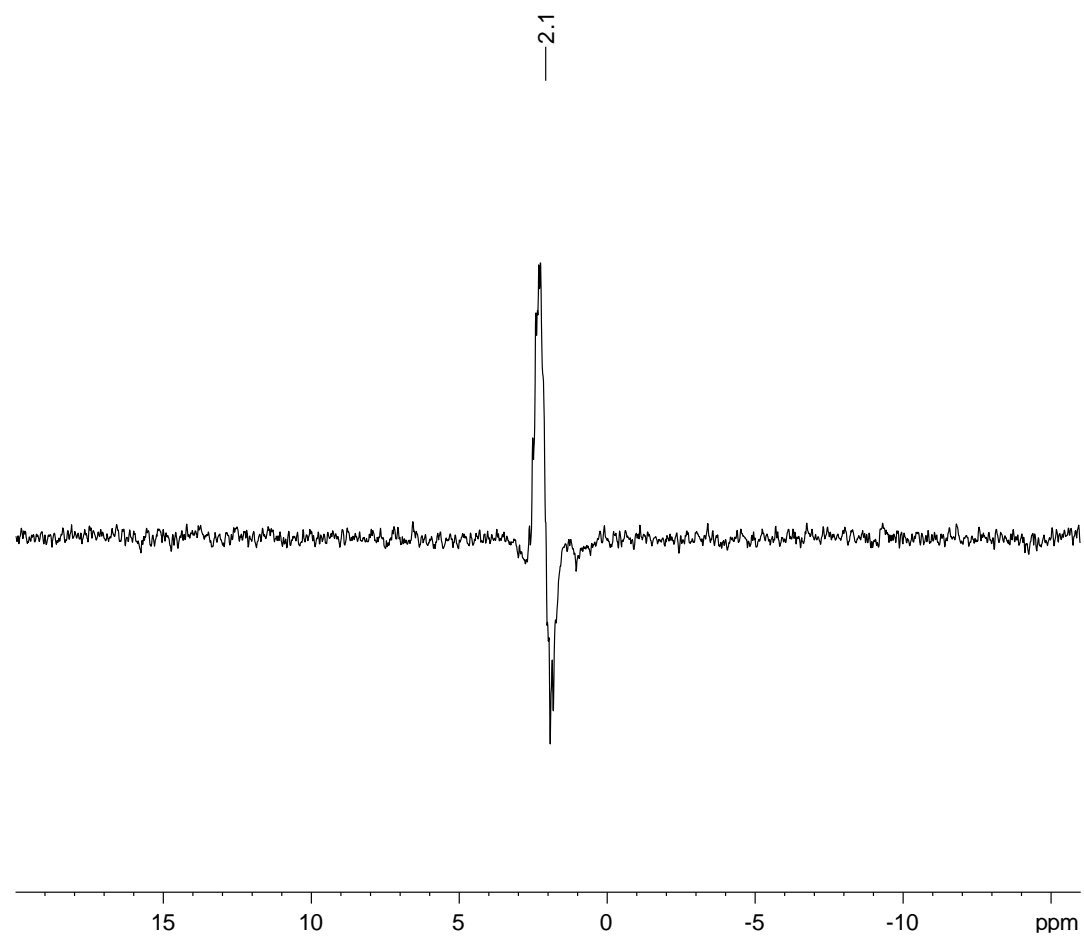

Current Data Parameters  
NAME MA263\_07042020\_300  
EXPNO 11  
PROCNO 1

F2 - Acquisition Parameters  
Date\_ 20200407  
Time 13.00 h  
INSTRUM spect  
PROBHD Z104275\_0338 (  
PULPROG ineptnd  
TD 39048  
SOLVENT Tol  
NS 320  
DS 0  
SWH 26315.789 Hz  
FIDRES 1.347869 Hz  
AQ 0.7419120 sec  
RG 204.67  
DW 19.000 usec  
DE 6.50 usec  
TE 298.0 K  
CNST2 6.5999999  
D1 2.0000000 sec  
D4 0.03787879 sec  
TD0 1  
SFO1 59.6229159 MHz  
NUC1  $^{29}\text{Si}$   
P1 10.30 usec  
P2 20.60 usec  
PLW1 50.00000000 W  
SFO2 300.1312005 MHz  
NUC2  $^1\text{H}$   
P3 14.00 usec  
P4 28.00 usec  
PLW2 8.26509953 W

F2 - Processing parameters  
SI 32768  
SF 59.6273880 MHz  
WDW EM  
SSB 0  
LB 2.00 Hz  
GB 0  
PC 1.00

Figure S72.  $^{29}\text{Si}$ -INEPTND-NMR spectrum of compound **14**.

$^{119}\text{Sn}$ -NMR of  $[\text{TbbSnH}_2]_2$  in  $\text{thf-d}_8$  at rt

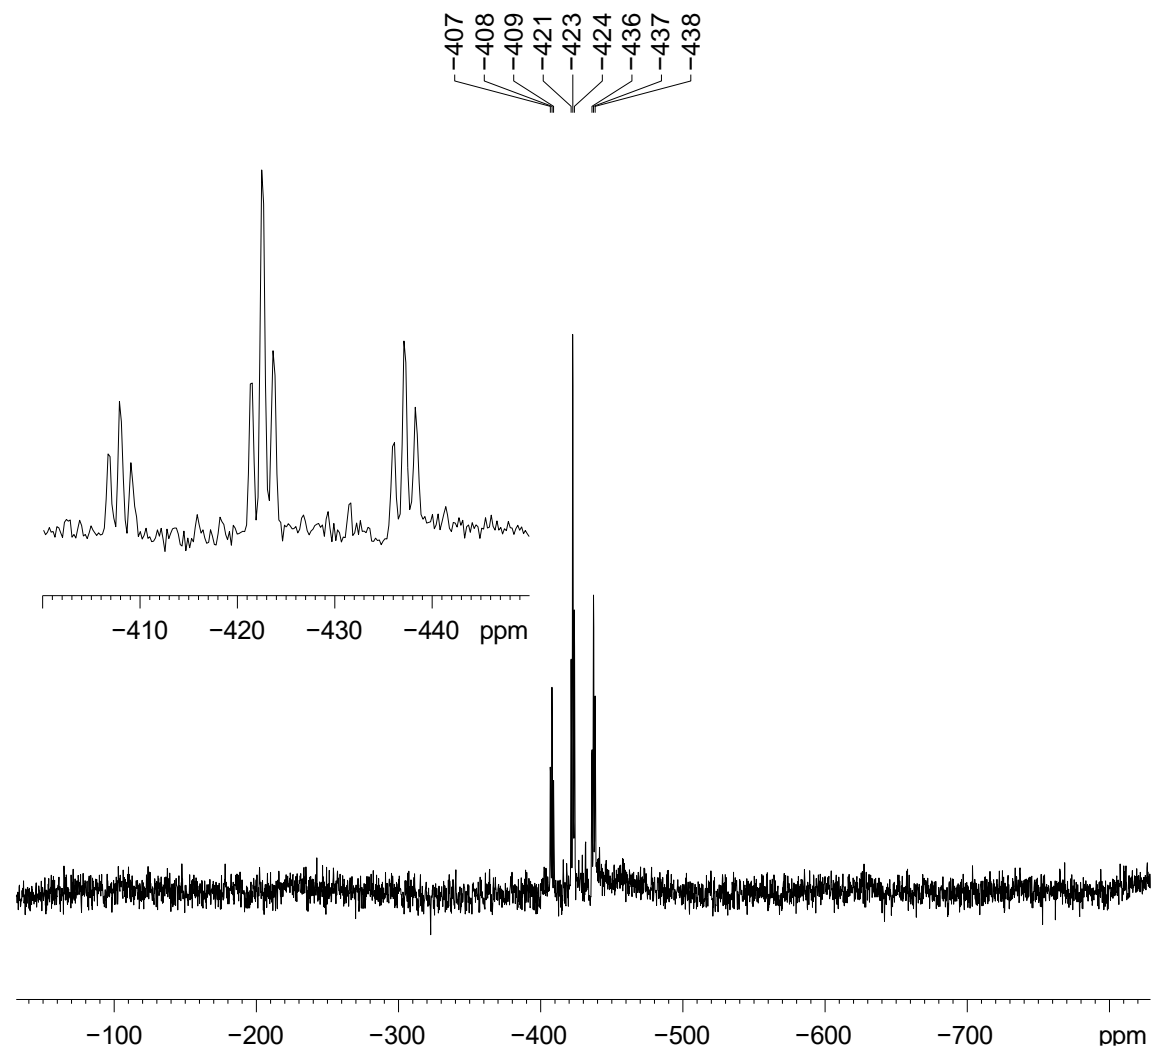

Current Data Parameters  
NAME MA815\_03022022\_300N  
EXPNO 24  
PROCNO 1

F2 - Acquisition Parameters  
Date\_ 20220203  
Time 20.35 h  
INSTRUM spect  
PROBHD Z104275\_0338 (  
PULPROG zg30  
TD 8918  
SOLVENT THF  
NS 204800  
DS 1  
SWH 89285.711 Hz  
FIDRES 20.023708 Hz  
AQ 0.0499408 sec  
RG 204.67  
DW 5.600 usec  
DE 6.50 usec  
TE 298.0 K  
D1 0.02000000 sec  
TD0 1  
SFO1 111.8722484 MHz  
NUC1  $^{119}\text{Sn}$   
P0 4.03 usec  
P1 12.10 usec  
PLW1 12.00000000 W

F2 - Processing parameters  
SI 4096  
SF 111.9203740 MHz  
WDW EM  
SSB 0  
LB 10.00 Hz  
GB 0  
PC 1.40

Figure S73.  $^{119}\text{Sn}$ -NMR spectrum of compound **14**.

$^{119}\text{Sn}\{^1\text{H}\}$ -NMR of  $[\text{TbbSnH}_2]_2$  in  $\text{thf-d}_8$  at rt

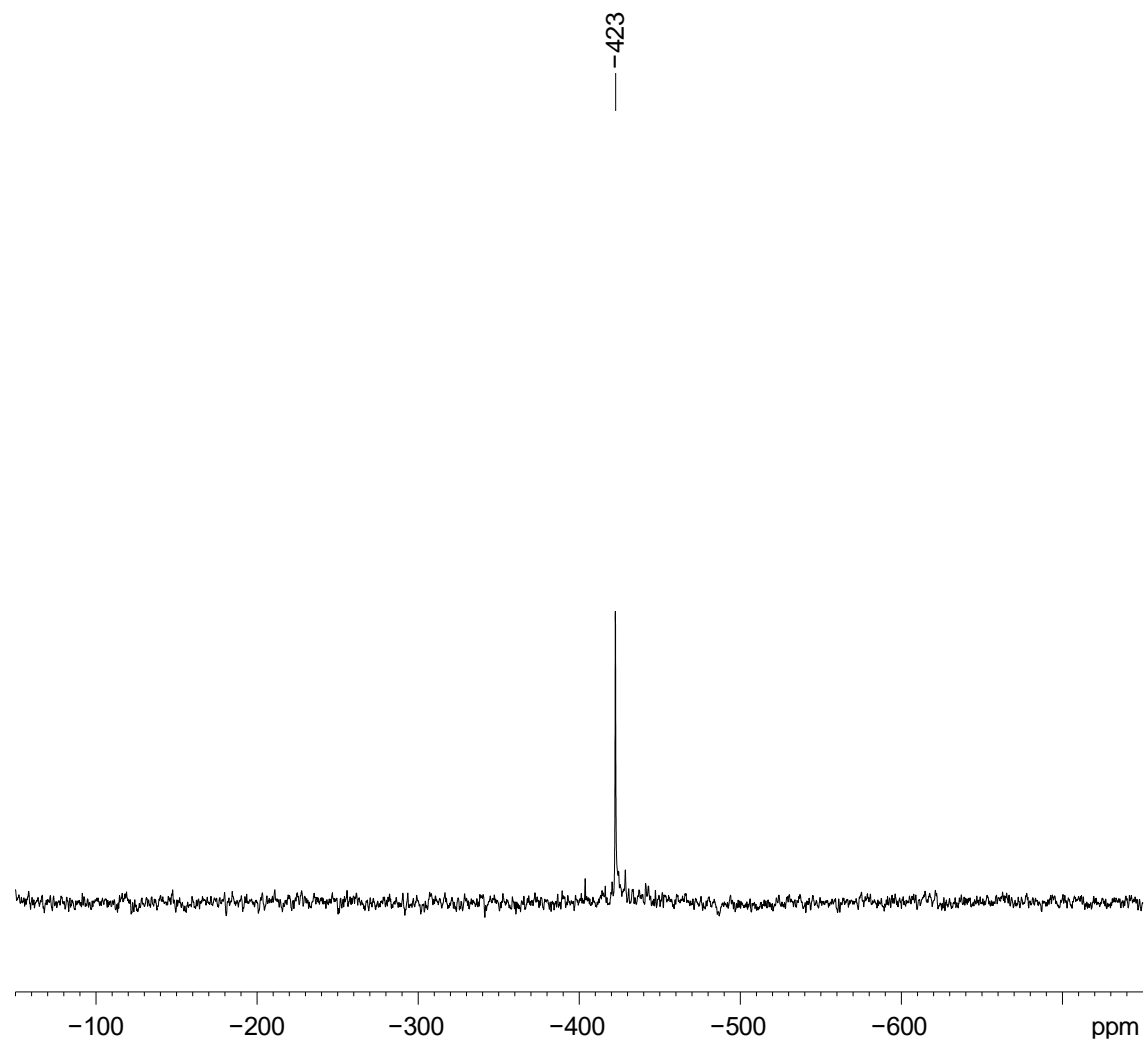

Current Data Parameters  
NAME MA815\_03022022\_300N  
EXPNO 34  
PROCNO 1

F2 - Acquisition Parameters  
Date\_ 20220204  
Time 2.26 h  
INSTRUM spect  
PROBHD Z104275\_0338 (  
PULPROG zgig30  
TD 39186  
SOLVENT THF  
NS 57344  
DS 4  
SWH 89285.711 Hz  
FIDRES 4.557021 Hz  
AQ 0.2194416 sec  
RG 204.67  
DW 5.600 usec  
DE 6.50 usec  
TE 298.0 K  
D1 0.10000000 sec  
D11 0.03000000 sec  
TD0 1  
SFO1 111.8722482 MHz  
NUC1  $^{119}\text{Sn}$   
P0 4.03 usec  
P1 12.10 usec  
PLW1 12.00000000 W  
SFO2 300.1312005 MHz  
NUC2  $^1\text{H}$   
CPDPRG[2] waltz16  
PCPD2 90.00 usec  
PLW2 8.26509953 W  
PLW12 0.20000000 W

F2 - Processing parameters  
SI 65536  
SF 111.9203738 MHz

Figure S74.  $^{119}\text{Sn}\{^1\text{H}\}$ -NMR spectrum of compound **14**.

# NMR spectra of compound 15

$^1\text{H-NMR}$  of  $\text{TbbSnH}(\textit{i}\text{Pr-NHC})$  in  $\text{C}_6\text{D}_6$  (#) at rt, \*:  $\textit{i}\text{Pr-NHC-H}_2$  + unknown impurity

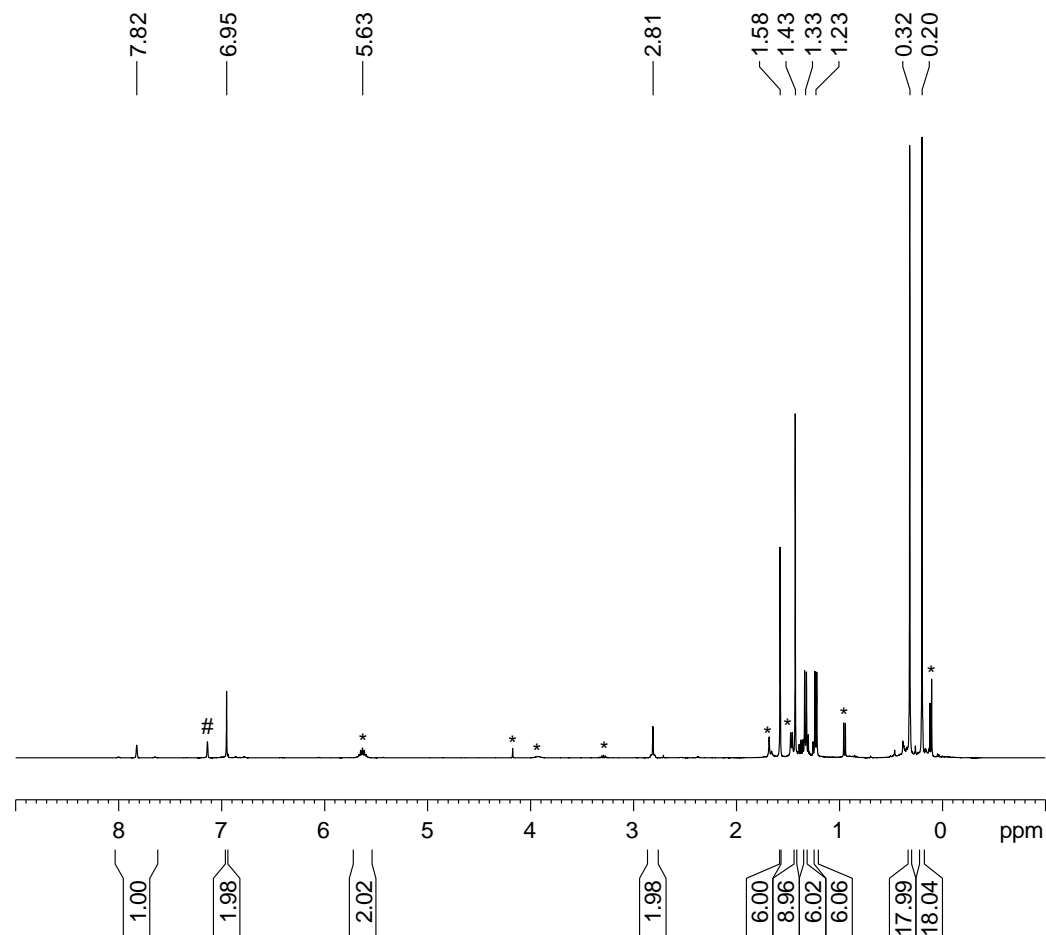

Current Data Parameters  
 NAME MA305\_19052020\_400N  
 EXPNO 10  
 PROCNO 1

F2 - Acquisition Parameters  
 Date\_ 20200519  
 Time 12.56  
 INSTRUM spect  
 PROBHD 5 mm QNP 1H/13  
 PULPROG zg30  
 TD 52656  
 SOLVENT C6D6  
 NS 32  
 DS 0  
 SWH 8305.647 Hz  
 FIDRES 0.157734 Hz  
 AQ 3.1698911 sec  
 RG 64  
 DW 60.200 usec  
 DE 6.00 usec  
 TE 299.2 K  
 D1 1.00000000 sec  
 TD0 1

===== CHANNEL f1 =====  
 NUC1 1H  
 P1 14.60 usec  
 PL1 -3.00 dB  
 PL1W 16.03799057 W  
 SFO1 400.1120007 MHz

F2 - Processing parameters  
 SI 65536  
 SF 400.1100011 MHz  
 WDW EM  
 SSB 0  
 LB 0 Hz  
 GB 0  
 PC 1.00

Figure S75.  $^1\text{H-NMR}$  spectrum of compound 15.

$^{13}\text{C}\{^1\text{H}\}$ -NMR of TbbSnH(*i*Pr-NHC) in  $\text{C}_6\text{D}_6$  (#) at rt, \*: *i*Pr-NHC- $\text{H}_2$  + unknown impurity

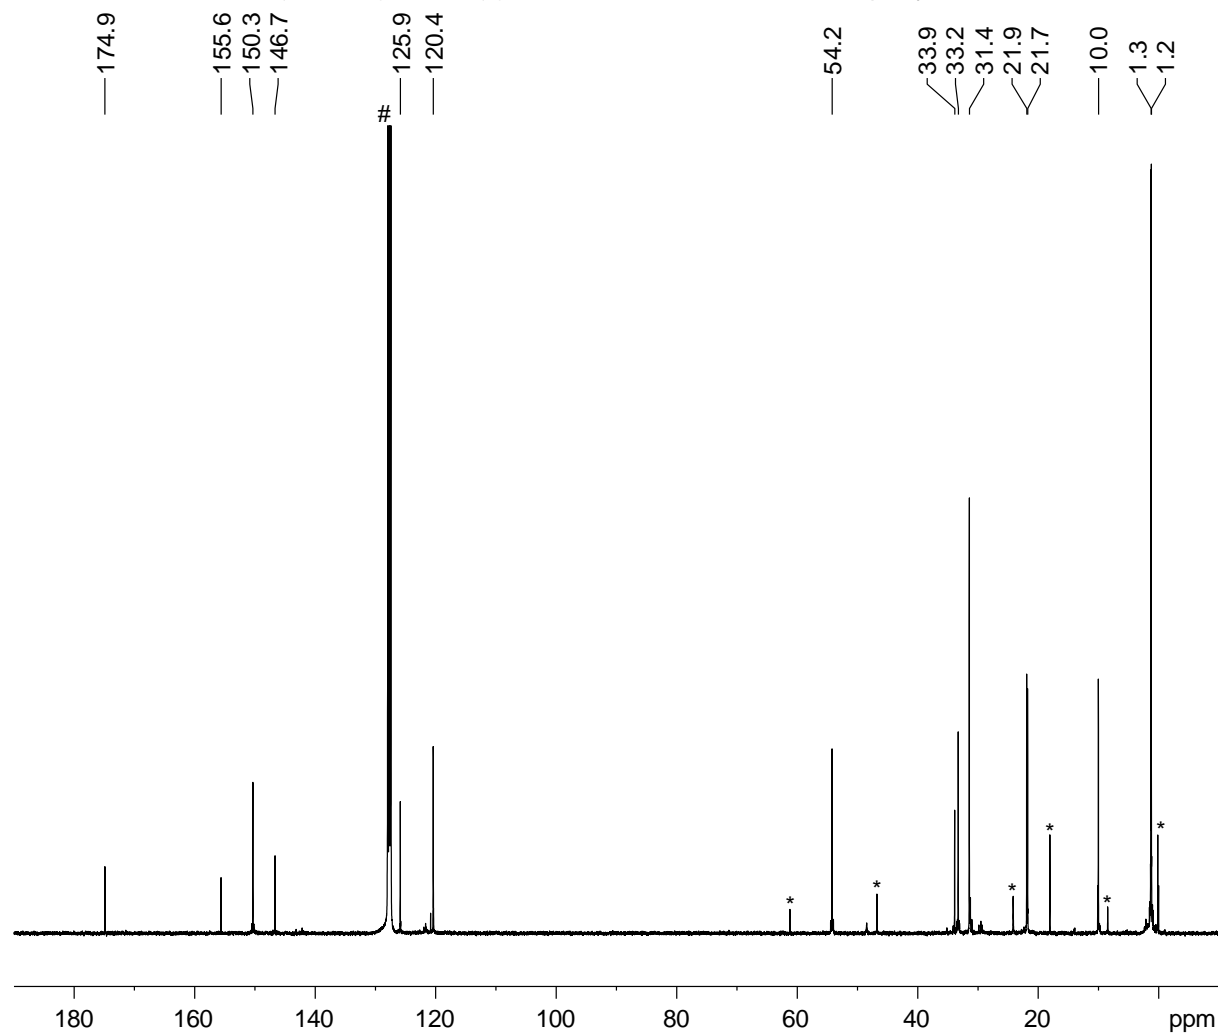

Current Data Parameters  
NAME MA305\_19052020\_400N  
EXPNO 12  
PROCNO 1

F2 - Acquisition Parameters  
Date\_ 20200520  
Time 2.08  
INSTRUM spect  
PROBHD 5 mm QNP 1H/13  
PULPROG zgpg30  
TD 53700  
SOLVENT C6D6  
NS 11264  
DS 0  
SWH 30864.197 Hz  
FIDRES 0.574752 Hz  
AQ 0.8699400 sec  
RG 32800  
DW 16.200 usec  
DE 6.00 usec  
TE 299.2 K  
D1 1.00000000 sec  
D11 0.03000000 sec  
TD0 1

==== CHANNEL f1 =====  
NUC1 13C  
P1 13.50 usec  
PL1 -4.16 dB  
PL1W 78.55633545 W  
SFO1 100.6198135 MHz

==== CHANNEL f2 =====  
CPDPRG[2] waltz16  
NUC2 1H  
PCPD2 80.00 usec  
PL2 -3.00 dB  
PL12 11.77 dB  
PL13 13.14 dB  
PL2W 16.03799057 W  
PL12W 0.53474891 W  
PL13W 0.39007664 W  
SFO2 400.1120007 MHz

F2 - Processing parameters  
SI 65536  
SF 100.6077392 MHz  
WDW EM  
SSB 0  
LB 1.00 Hz  
GB 0  
PC 1.40

Figure S76.  $^{13}\text{C}\{^1\text{H}\}$ -NMR spectrum of compound **15**.

<sup>29</sup>Si-INEPTND-NMR of TbbSnH(*i*Pr-NHC) in C<sub>6</sub>D<sub>6</sub> at rt

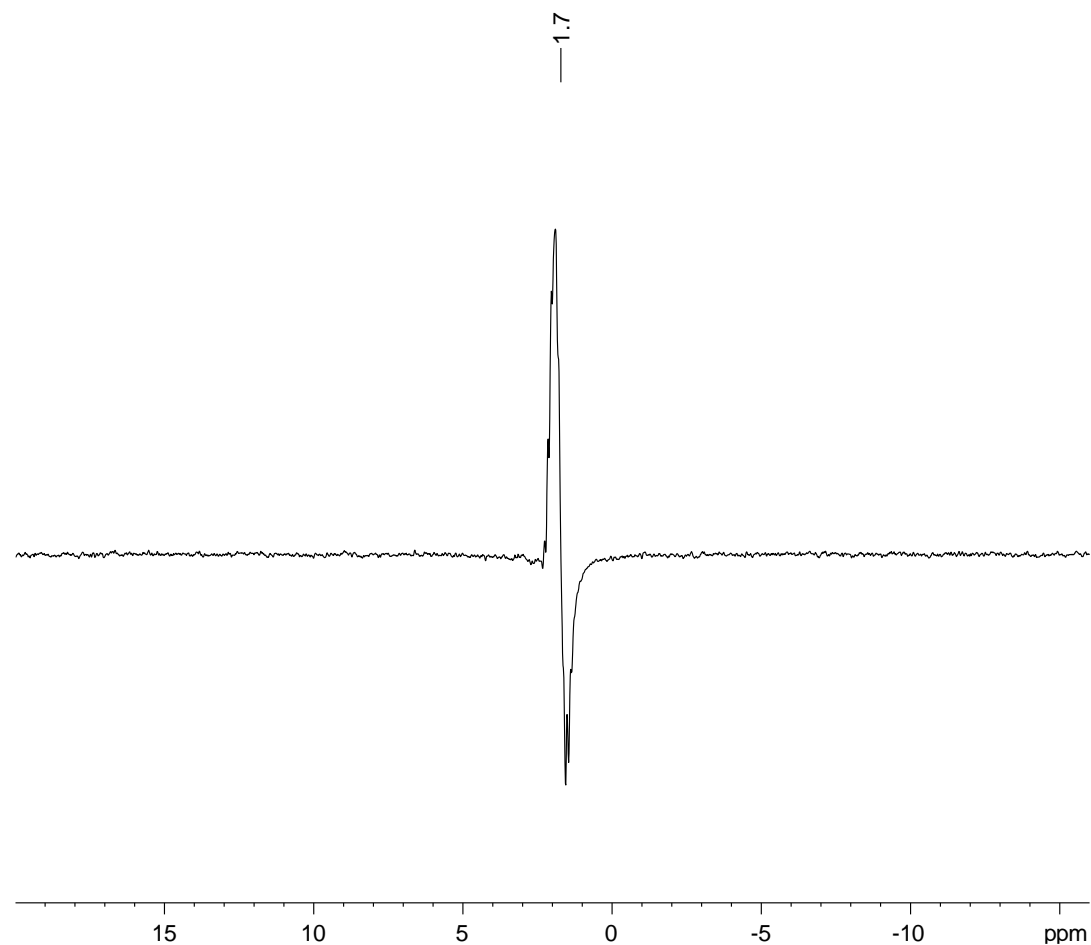

Current Data Parameters  
NAME MA305\_20052020\_300  
EXPNO 11  
PROCNO 1

F2 - Acquisition Parameters  
Date\_ 20200520  
Time 8.48 h  
INSTRUM spect  
PROBHD Z104275\_0338 (  
PULPROG ineptnd  
TD 39048  
SOLVENT C6D6  
NS 320  
DS 0  
SWH 26315.789 Hz  
FIDRES 1.347869 Hz  
AQ 0.7419120 sec  
RG 204.67  
DW 19.000 usec  
DE 6.50 usec  
TE 298.0 K  
CNST2 6.5999999  
D1 2.0000000 sec  
D4 0.03787879 sec  
TD0 1  
SFO1 59.6229159 MHz  
NUC1 29Si  
P1 10.30 usec  
P2 20.60 usec  
PLW1 50.00000000 W  
SFO2 300.1312005 MHz  
NUC2 1H  
P3 14.00 usec  
P4 28.00 usec  
PLW2 8.26509953 W

F2 - Processing parameters  
SI 32768  
SF 59.6273589 MHz  
WDW EM  
SSB 0  
LB 2.00 Hz  
GB 0  
PC 1.00

Figure S77. <sup>29</sup>Si-INEPTND-NMR spectrum of compound **15**.

$^{119}\text{Sn}$ -NMR of  $\text{TbbSnH}(\text{/Pr-NHC})$  in  $\text{C}_6\text{D}_6$  at rt

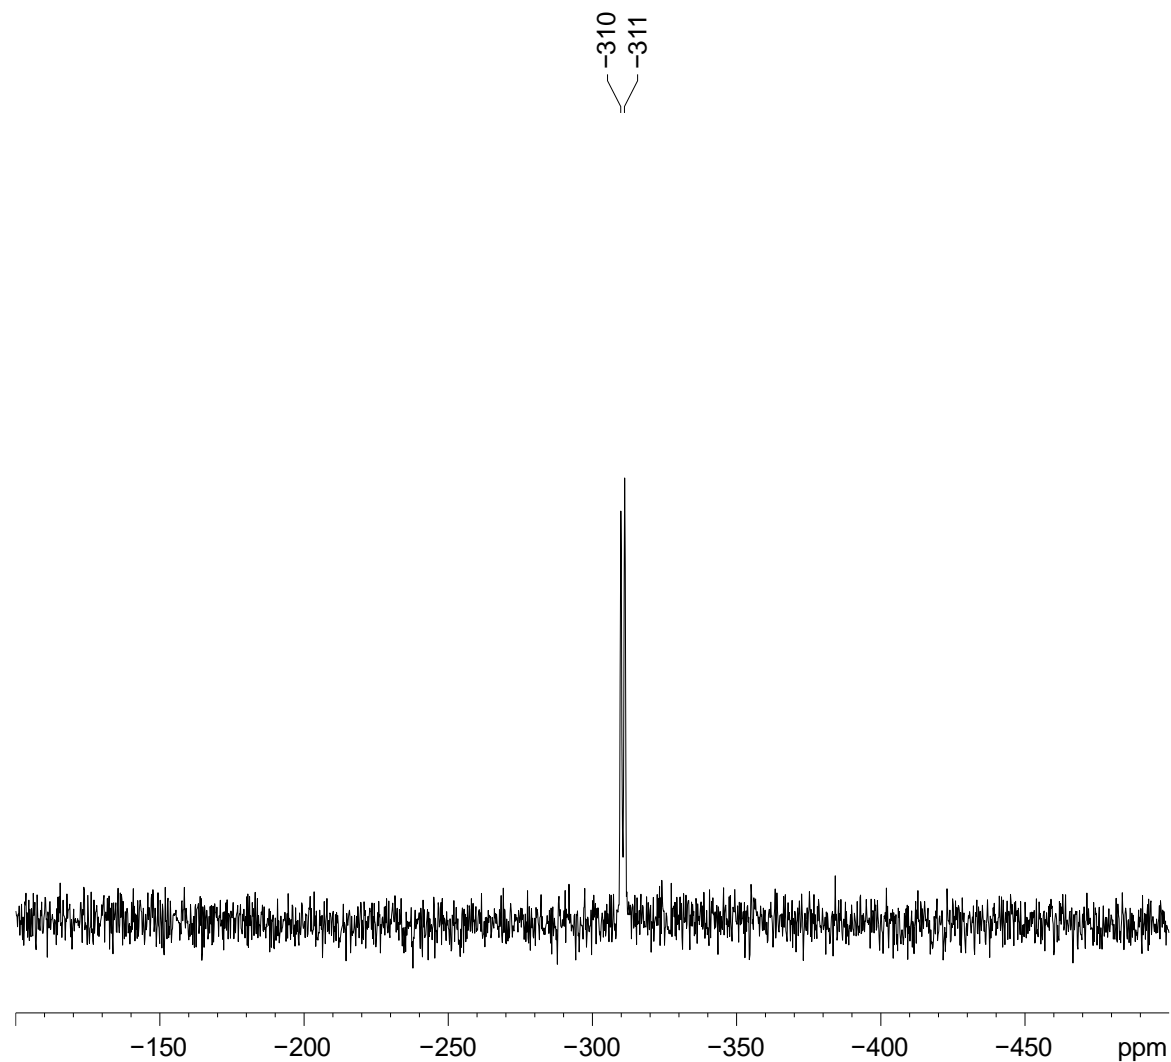

Current Data Parameters  
NAME MA236\_05022020\_300  
EXPNO 11  
PROCNO 1

F2 - Acquisition Parameters  
Date\_ 20200205  
Time 14.12 h  
INSTRUM spect  
PROBHD Z104275\_0338 (  
PULPROG zg30  
TD 8918  
SOLVENT C6D6  
NS 16384  
DS 1  
SWH 89285.711 Hz  
FIDRES 20.023708 Hz  
AQ 0.0499408 sec  
RG 204.67  
DW 5.600 usec  
DE 6.50 usec  
TE 298.0 K  
D1 0.02000000 sec  
TD0 1  
SFO1 111.8867979 MHz  
NUC1  $^{119}\text{Sn}$   
P1 12.10 usec  
PLW1 12.00000000 W

F2 - Processing parameters  
SI 4096  
SF 111.9203740 MHz  
WDW EM  
SSB 0  
LB 5.00 Hz  
GB 0  
PC 1.40

Figure S78.  $^{119}\text{Sn}$ -NMR spectrum of compound **15**.



$^{119}\text{Sn}\{^1\text{H}\}$ -NMR of  $\text{TbbSnH}(\text{iPr-NHC})$  in  $\text{C}_6\text{D}_6$  at rt

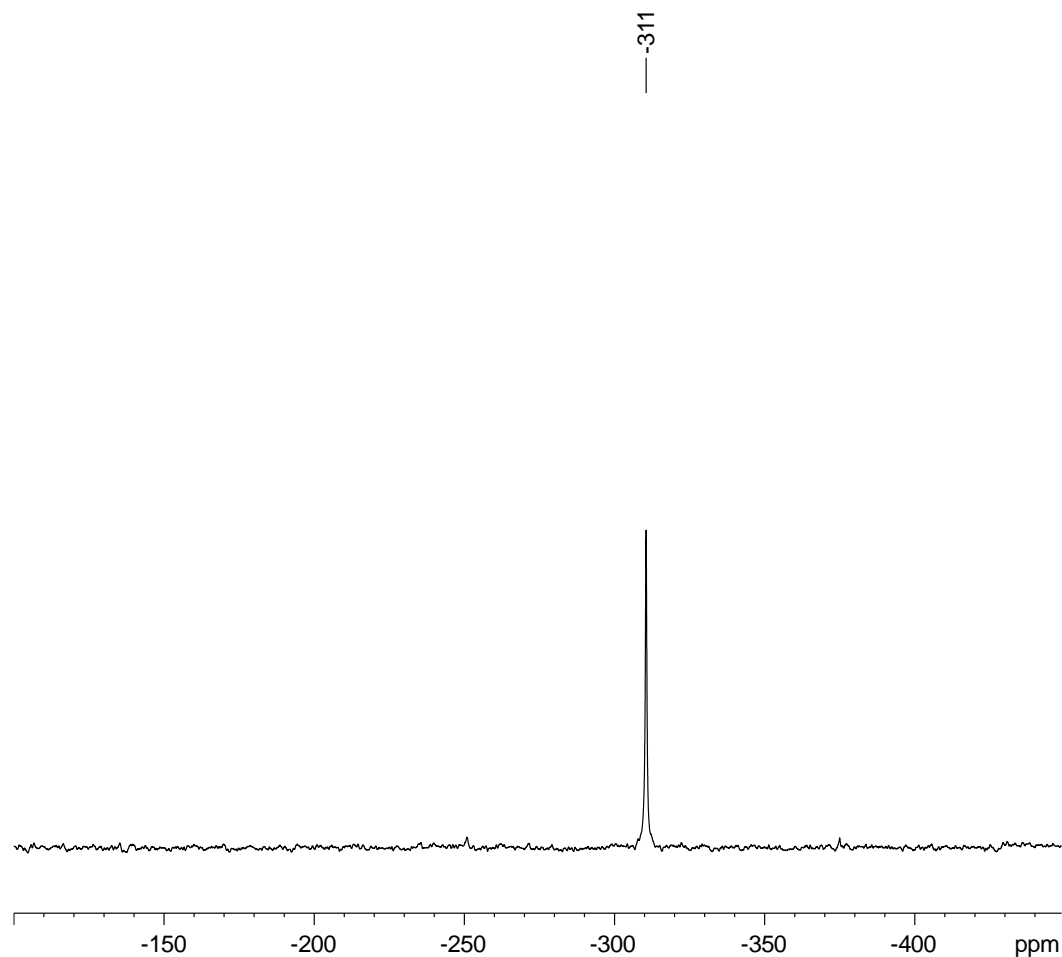

Current Data Parameters  
NAME MA305\_20052020\_300  
EXPNO 20  
PROCNO 1

F2 - Acquisition Parameters  
Date\_ 20200520  
Time 10.43 h  
INSTRUM spect  
PROBHD Z104275\_0338 (  
PULPROG zgig30  
TD 39186  
SOLVENT C6D6  
NS 5120  
DS 4  
SWH 89285.711 Hz  
FIDRES 4.557021 Hz  
AQ 0.2194416 sec  
RG 204.67  
DW 5.600 usec  
DE 6.50 usec  
TE 298.0 K  
D1 0.10000000 sec  
D11 0.03000000 sec  
TD0 1  
SFO1 111.9147778 MHz  
NUC1  $^{119}\text{Sn}$   
P0 4.03 usec  
P1 12.10 usec  
PLW1 12.00000000 W  
SFO2 300.1312005 MHz  
NUC2  $^1\text{H}$   
CPDPRG[2] waltz16  
PCPD2 90.00 usec  
PLW2 8.26509953 W  
PLW12 0.20000000 W

F2 - Processing parameters  
SI 65536  
SF 111.9203738 MHz  
WDW EM  
SSB 0  
LB 50.00 Hz  
GB 0  
PC 1.40

Figure S79.  $^{119}\text{Sn}\{^1\text{H}\}$ -NMR spectrum of compound **15**.

# NMR spectra of compound 16

$^1\text{H-NMR}$  of  $\text{Ar}^*\text{GeH}(\text{Me-NHC})$  in  $\text{C}_6\text{D}_6$  (#) at rt

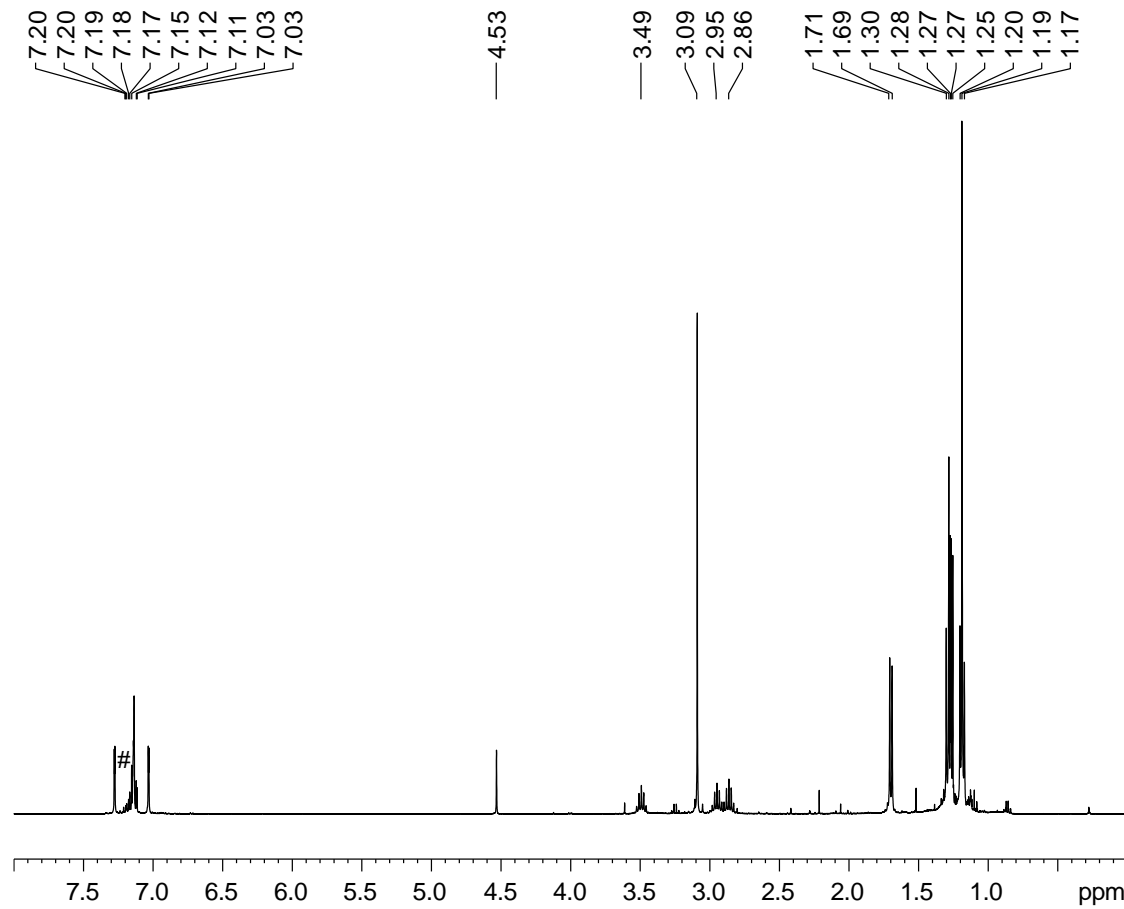

Current Data Parameters  
 NAME FD033\_9-20160909-LW\_Diab  
 EXPNO 10  
 PROCNO 1

F2 - Acquisition Parameters  
 Date\_ 20160909  
 Time 20.06  
 INSTRUM spect  
 PROBHD 5 mm QNP 1H/13  
 PULPROG zg30  
 TD 52656  
 SOLVENT C6D6  
 NS 32  
 DS 0  
 SWH 8305.647 Hz  
 FIDRES 0.157734 Hz  
 AQ 3.1698911 sec  
 RG 228  
 DW 60.200 usec  
 DE 6.00 usec  
 TE 299.2 K  
 D1 1.00000000 sec  
 TDO 1

===== CHANNEL f1 =====  
 NUC1 1H  
 P1 14.60 usec  
 PL1 -3.00 dB  
 PL1W 16.03799057 W  
 SFO1 400.1120007 MHz

F2 - Processing parameters  
 SI 65536  
 SF 400.1100000 MHz  
 WDW EM  
 SSB 0  
 LB 0 Hz  
 GB 0  
 PC 1.00

Figure S80.  $^1\text{H-NMR}$  spectrum of compound 16.

$^{13}\text{C}\{^1\text{H}\}$ -NMR of Ar\*GeH(Me-NHC) in  $\text{C}_6\text{D}_6$  (#) at rt

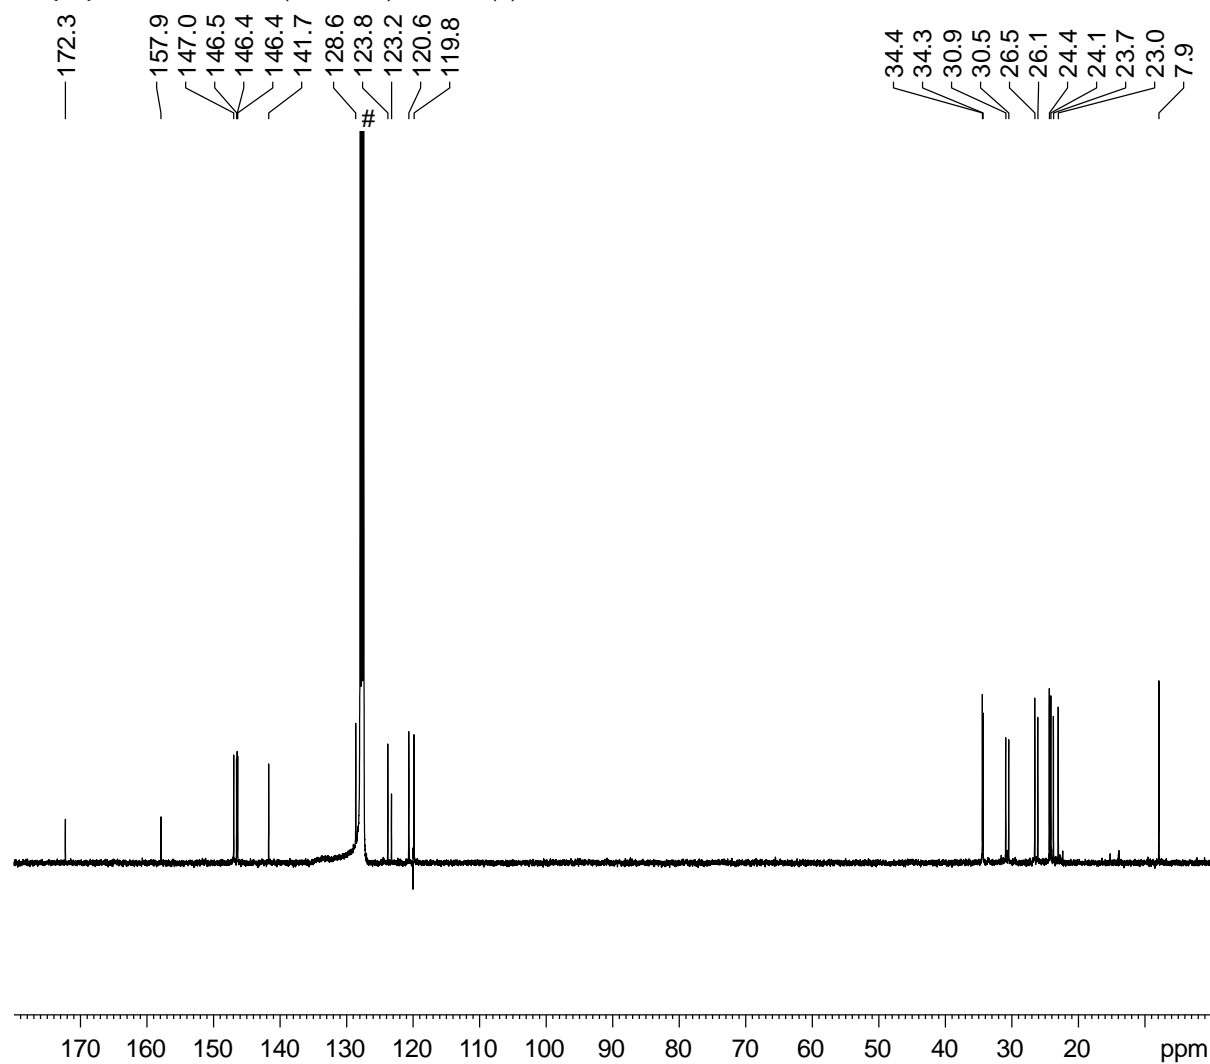

Current Data Parameters  
NAME FD033\_9-20160909-LW\_Diab  
EXPNO 11  
PROCNO 1

F2 - Acquisition Parameters  
Date\_ 20160910  
Time 5.14  
INSTRUM spect  
PROBHD 5 mm QNP 1H/13  
PULPROG zgpg30  
TD 53700  
SOLVENT C6D6  
NS 17000  
DS 0  
SWH 30864.197 Hz  
FIDRES 0.574752 Hz  
AQ 0.8699400 sec  
RG 32800  
DW 16.200 usec  
DE 6.00 usec  
TE 299.2 K  
D1 1.00000000 sec  
D11 0.03000000 sec  
TD0 1

===== CHANNEL f1 =====  
NUC1 13C  
P1 13.50 usec  
PL1 -4.16 dB  
PL1W 78.55633545 W  
SFO1 100.6198135 MHz

===== CHANNEL f2 =====  
CPDPRG[2] waltz16  
NUC2 1H  
PCPD2 80.00 usec  
PL2 -3.00 dB  
PL12 11.77 dB  
PL13 13.14 dB  
PL2W 16.03799057 W  
PL12W 0.53474891 W  
PL13W 0.39007664 W  
SFO2 400.1120007 MHz

F2 - Processing parameters  
SI 65536  
SF 100.6077400 MHz  
WDW EM  
SSB 0  
LB 1.00 Hz  
GB 0  
PC 1.40

Figure S81.  $^{13}\text{C}\{^1\text{H}\}$ -NMR spectrum of compound **16**.

# NMR spectra of compound 17

<sup>1</sup>H-NMR of TbbGeH(Me-NHC) in C<sub>6</sub>D<sub>6</sub> (#) at rt, +: unknown impurities

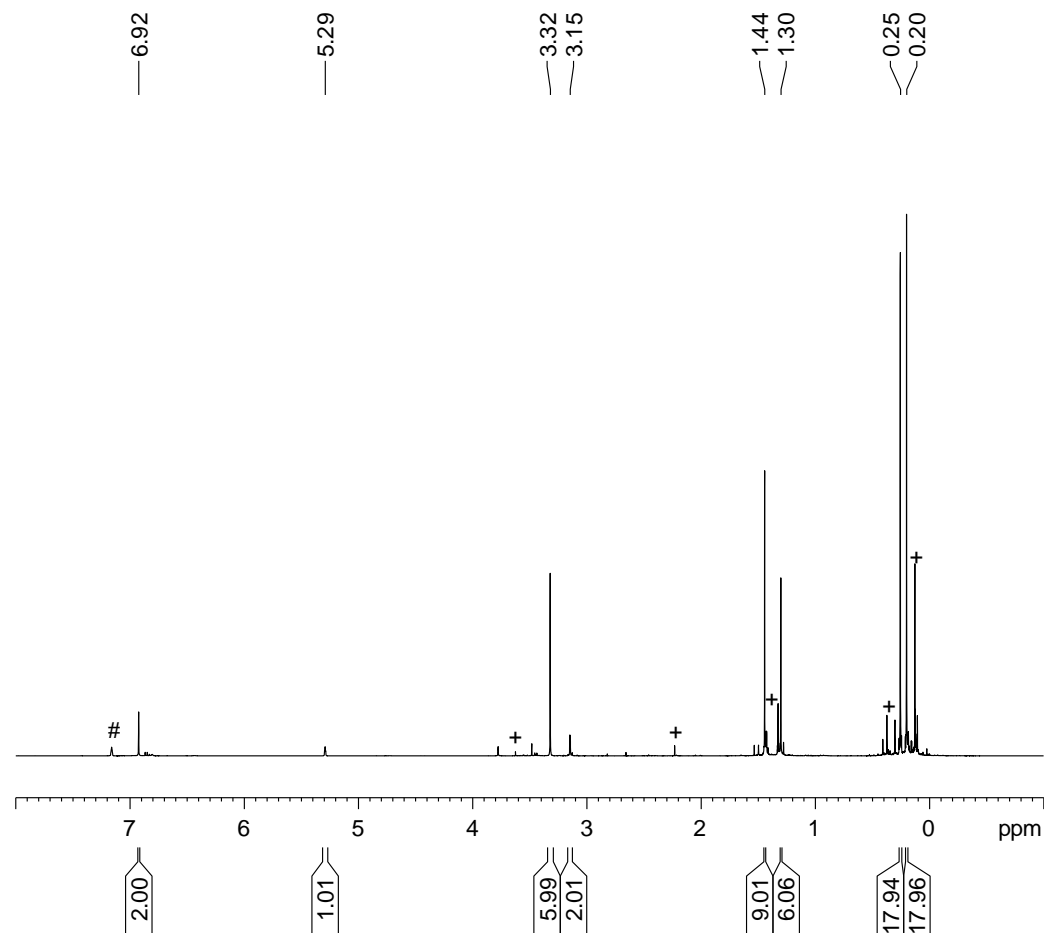

Current Data Parameters  
 NAME MA427\_30102020\_300N  
 EXPNO 10  
 PROCNO 1

F2 - Acquisition Parameters  
 Date\_ 20201030  
 Time 16.41 h  
 INSTRUM spect  
 PROBHD Z104275\_0338 (  
 PULPROG zg30  
 TD 38044  
 SOLVENT C6D6  
 NS 32  
 DS 0  
 SWH 6009.615 Hz  
 FIDRES 0.315930 Hz  
 AQ 3.1652608 sec  
 RG 100.47  
 DW 83.200 usec  
 DE 6.50 usec  
 TE 298.0 K  
 D1 1.00000000 sec  
 TD0 1  
 SFO1 300.1318533 MHz  
 NUC1 1H  
 P0 4.67 usec  
 P1 14.00 usec  
 PLW1 8.26509953 W

F2 - Processing parameters  
 SI 32768  
 SF 300.1299975 MHz  
 WDW EM  
 SSB 0  
 LB 0 Hz  
 GB 0  
 PC 1.00

Figure S82. <sup>1</sup>H-NMR spectrum of compound 17.

$^{13}\text{C}\{^1\text{H}\}$ -NMR of TbbGeH(Me-NHC) in  $\text{C}_6\text{D}_6$  (#) at rt

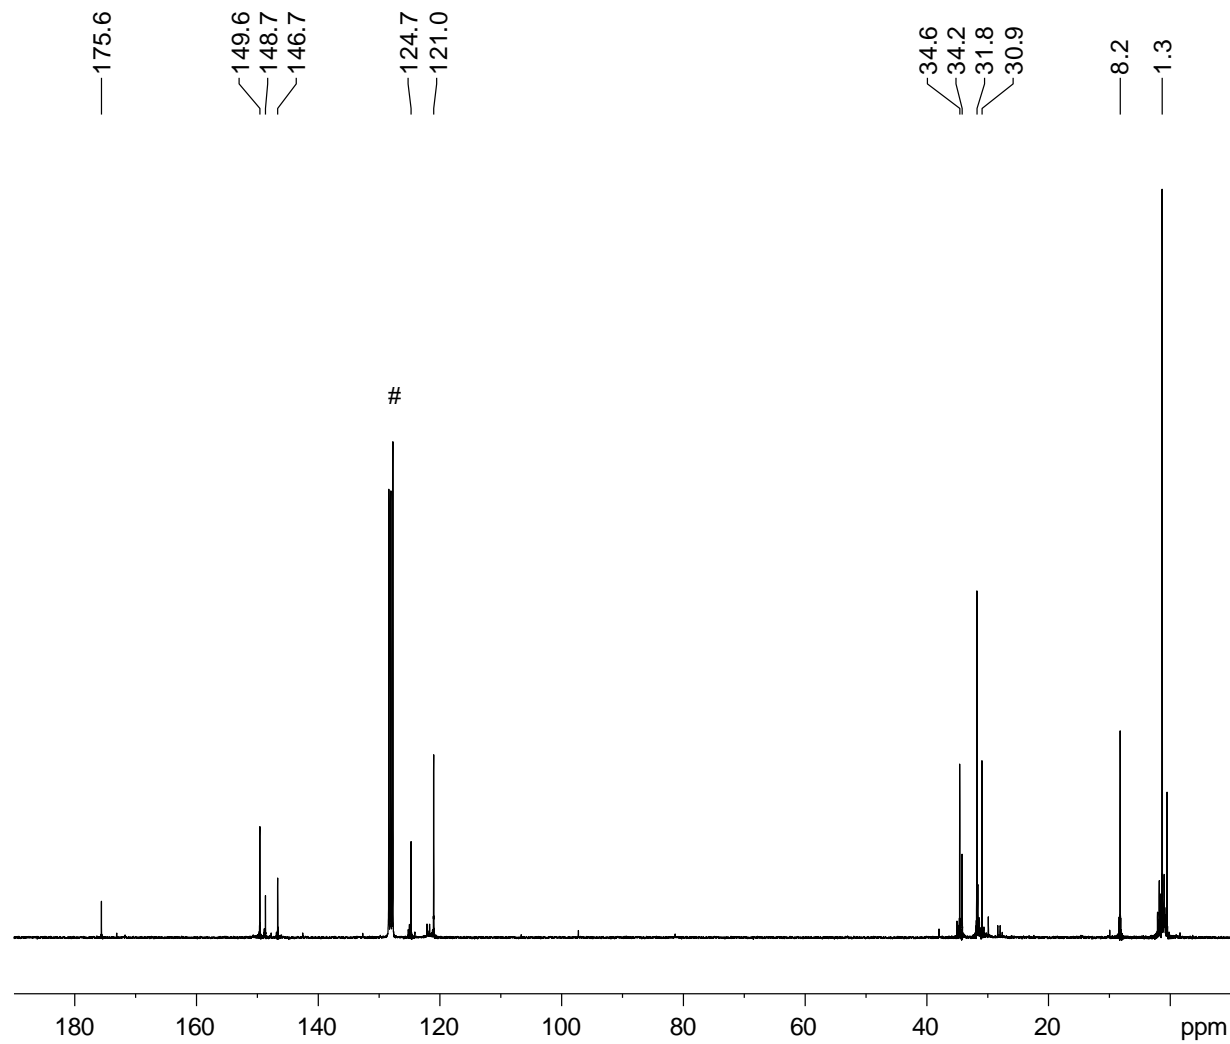

Current Data Parameters  
NAME MA427\_30102020\_300I  
EXPNO 13  
PROCNO 1

F2 - Acquisition Parameters  
Date\_ 20201031  
Time 0.09 h  
INSTRUM spect  
PROBHD Z104275\_0338 (  
PULPROG udeflt  
TD 13040  
SOLVENT C6D6  
NS 4608  
DS 4  
SWH 18115.941 Hz  
FIDRES 2.778519 Hz  
AQ 0.3599040 sec  
RG 204.67  
DW 27.600 usec  
DE 6.50 usec  
TE 298.0 K  
D1 4.00000000 sec  
D12 0.00002000 sec  
D20 20.00000000 sec  
TD0 1  
SFO1 75.4752953 MHz  
NUC1 13C  
P1 10.00 usec  
P13 2000.00 usec  
P26 500.00 usec  
PLW1 33.55099869 W  
SPNAM[5] Crp60comp.4  
SPOAL5 0.500  
SPOFFS5 0 Hz  
SPW5 5.12620020 W  
SPNAM[8] Crp60,0,5,20.1  
SPOAL8 0.500  
SPOFFS8 0 Hz  
SPW8 5.12620020 W  
SFO2 300.1312005 MHz  
NUC2 1H  
CPDPRG[2] waltz16  
PCPD2 90.00 usec  
PLW2 8.26509953 W  
PLW12 0.20000000 W

F2 - Processing parameters  
SI 32768  
SF 75.4677196 MHz  
WDW EM  
SSB 0  
LB 1.00 Hz  
GB 0  
PC 1.40

Figure S83.  $^{13}\text{C}\{^1\text{H}\}$ -NMR spectrum of compound **17**.

$^{29}\text{Si}$ -INEPTND-NMR of TbbGeH(Me-NHC) in  $\text{C}_6\text{D}_6$  at rt

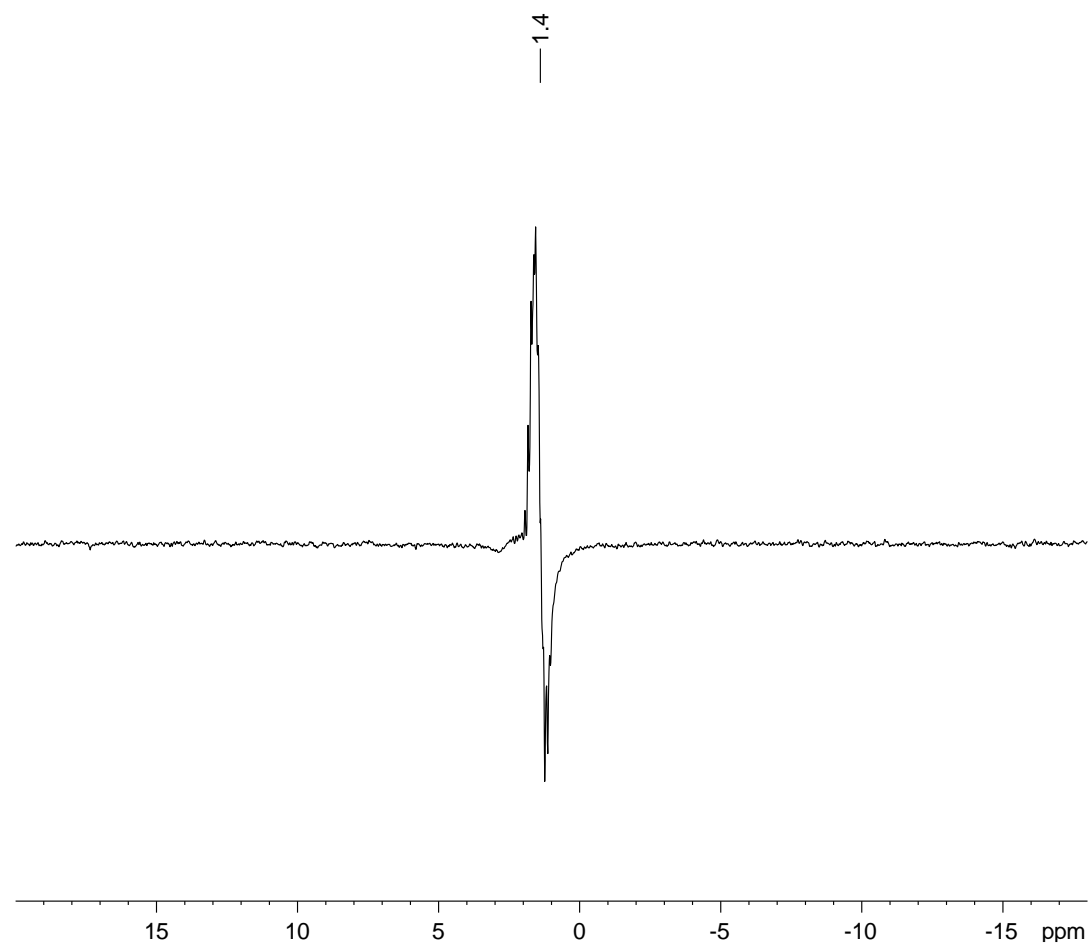

Current Data Parameters  
NAME MA427\_30102020\_300N  
EXPNO 11  
PROCNO 1

F2 - Acquisition Parameters  
Date\_ 20201030  
Time 16.57 h  
INSTRUM spect  
PROBHD Z104275\_0338 (  
PULPROG ineptnd  
TD 39048  
SOLVENT C6D6  
NS 320  
DS 0  
SWH 26315.789 Hz  
FIDRES 1.347869 Hz  
AQ 0.7419120 sec  
RG 204.67  
DW 19.000 usec  
DE 6.50 usec  
TE 298.0 K  
CNST2 6.5999999  
D1 2.00000000 sec  
D4 0.03787879 sec  
TD0 1  
SFO1 59.62229159 MHz  
NUC1 29Si  
P1 10.30 usec  
P2 20.60 usec  
PLW1 50.00000000 W  
SFO2 300.1312005 MHz  
NUC2 1H  
P3 14.00 usec  
P4 28.00 usec  
PLW2 8.26509953 W

F2 - Processing parameters  
SI 32768  
SF 59.6273759 MHz  
WDW EM  
SSB 0  
LB 2.00 Hz  
GB 0  
PC 1.00

Figure S84.  $^{29}\text{Si}$ -INEPTND-NMR spectrum of compound **17**.

## NMR spectroscopic analysis of distannanes $\text{ArSnH}_2\text{-SnH}_2\text{Ar}$

Molecules  $\text{RH}_2\text{SnSnH}_2\text{R}$  containing at least one NMR active tin atom constitute higher order spin systems due to the magnetic non-equivalence of the tin hydride protons. However, because the  $^1J(\text{Sn,H})$  and  $^2J(\text{Sn,H})$  coupling constants are much greater than the H,H coupling constants, the error is insignificant if their contributions to the multiplets are analyzed according to first-order rules (i.e., the two “doublets” of  $^{119}\text{Sn}$  satellites in the  $^1\text{H}$  NMR spectrum, Fig. S85, or the “triplet of triplets” of the major isotopologue in the  $^{119}\text{Sn}$  NMR spectrum, Fig. S85, an  $\text{A}_2\text{XB}_2$  spin system). An exception is the isotopologue containing two  $^{119}\text{Sn}$  nuclei, an  $\text{A}_2\text{XX}'\text{A}'_2$  spin system. Its subspectrum completely differs from the  $^{119}\text{Sn}, ^{117}\text{Sn}$  isotopologue, which constitutes an  $\text{A}_2\text{XYB}_2$  spin system. The  $^1J(^{119}\text{Sn}, ^{117}\text{Sn})$  coupling constant can be obtained from the  $^{119}\text{Sn}\{^1\text{H}\}$  NMR spectrum independently.

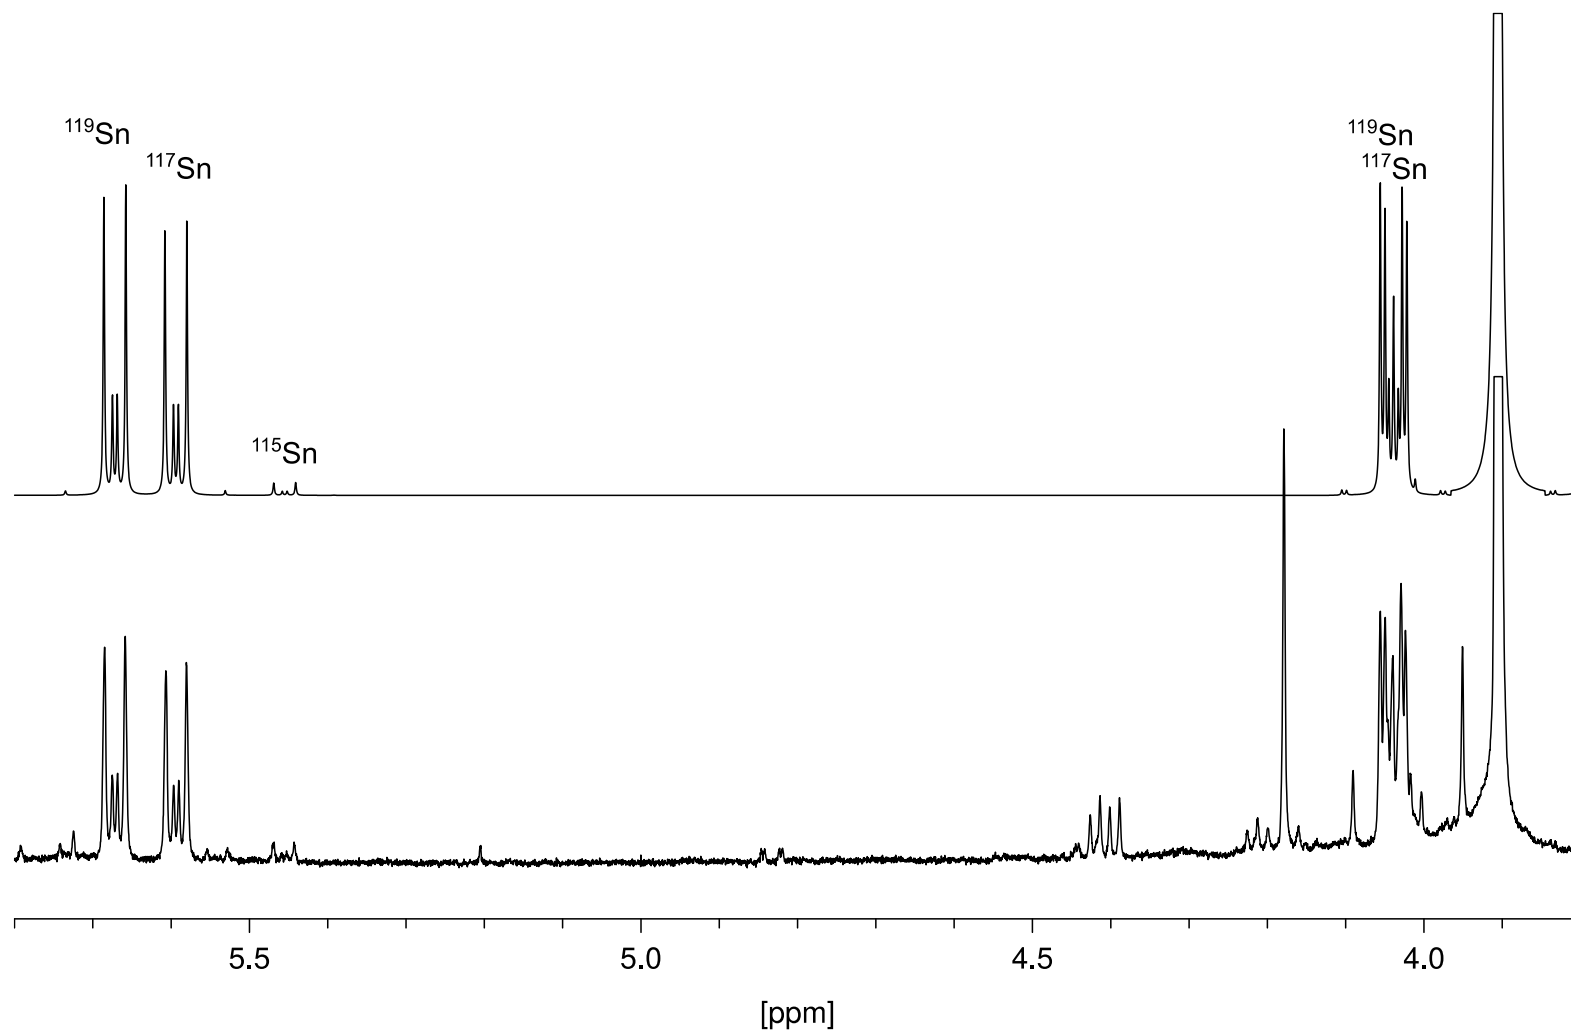

Figure S85. High-frequency half of the experimental and simulated  $^1\text{H}$  NMR spectra due to the Sn-H protons of  $[\text{Ar}'\text{SnH}_2]_2$  at 3.91 ppm, obtained at 500.13 MHz (r.t.). The satellites due to  $^{119}\text{Sn}$ ,  $^{117}\text{Sn}$  or  $^{115}\text{Sn}$  show the effect of  $^1\text{H}$ - $^1\text{H}$  couplings.



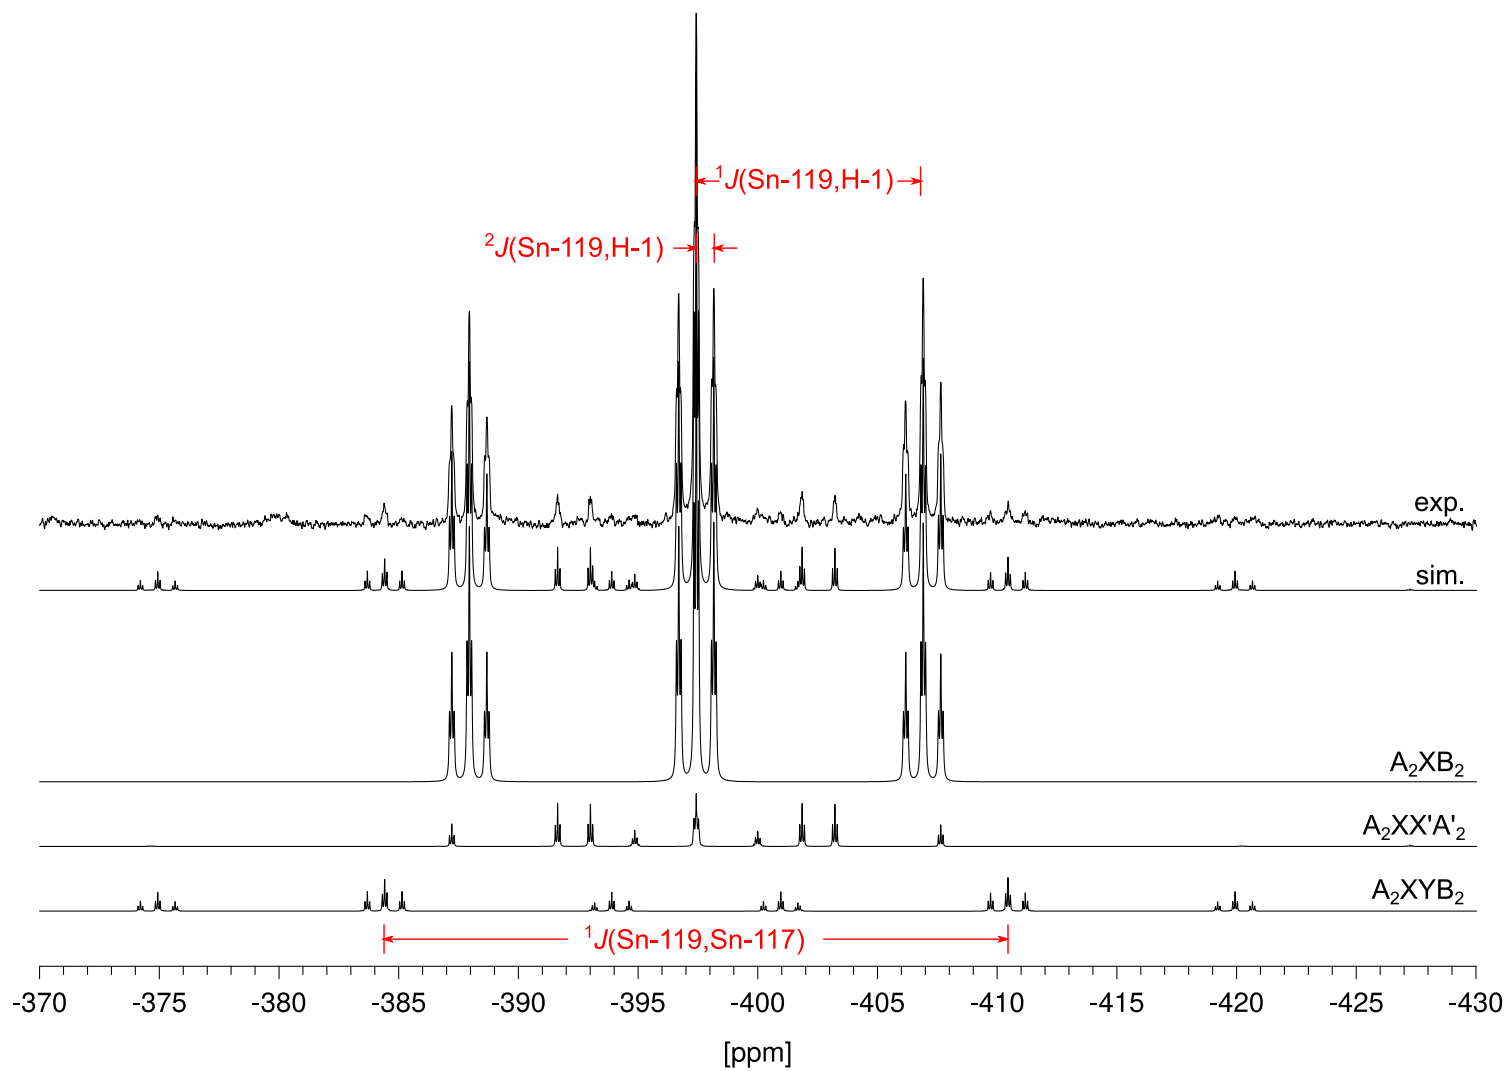

Figure S86. Experimental and calculated  $^{119}\text{Sn}$  NMR spectra of  $[\text{Ar}'\text{SnH}_2]_2$  obtained at 186.50 MHz (r.t.).

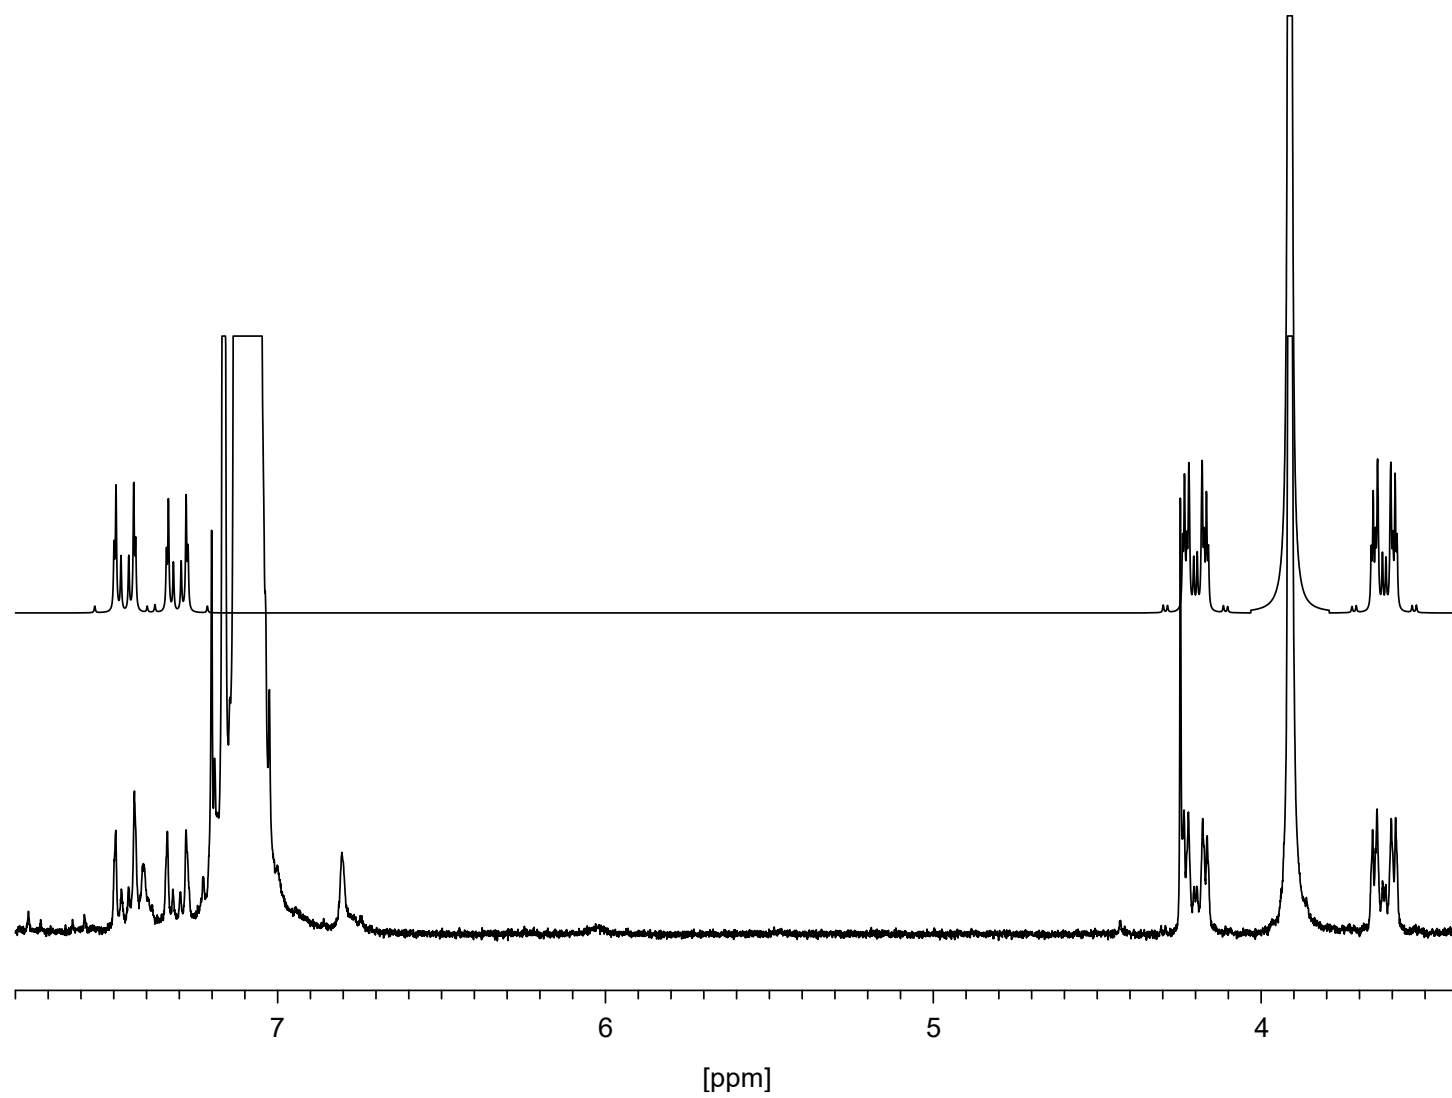

Figure S87. Experimental and calculated  $^1\text{H-NMR}$  of  $(\text{Ar}^*\text{SnH})_2$ .

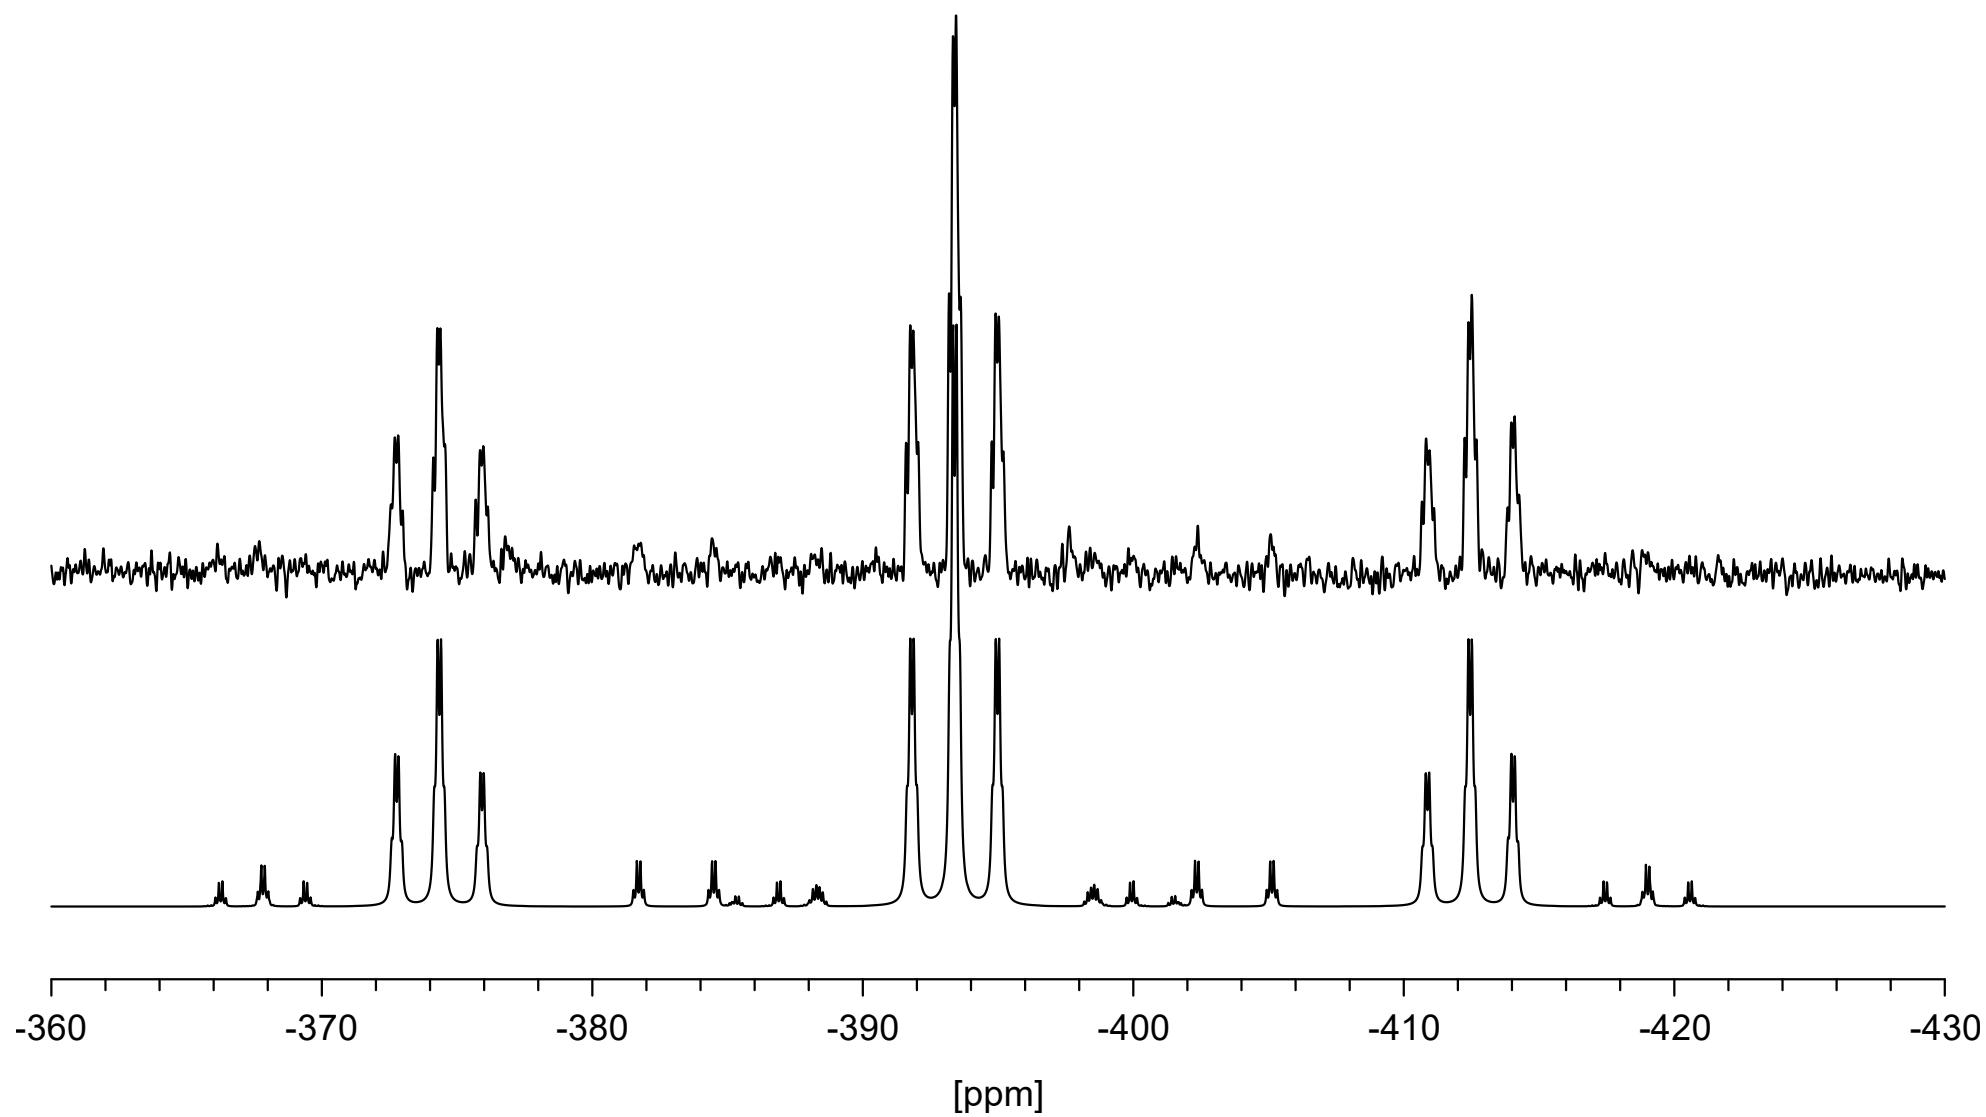

Figure S88. Experimental and calculated  $^{119}\text{Sn}$ -NMR of  $(\text{Ar}^*\text{SnH})_2$ .

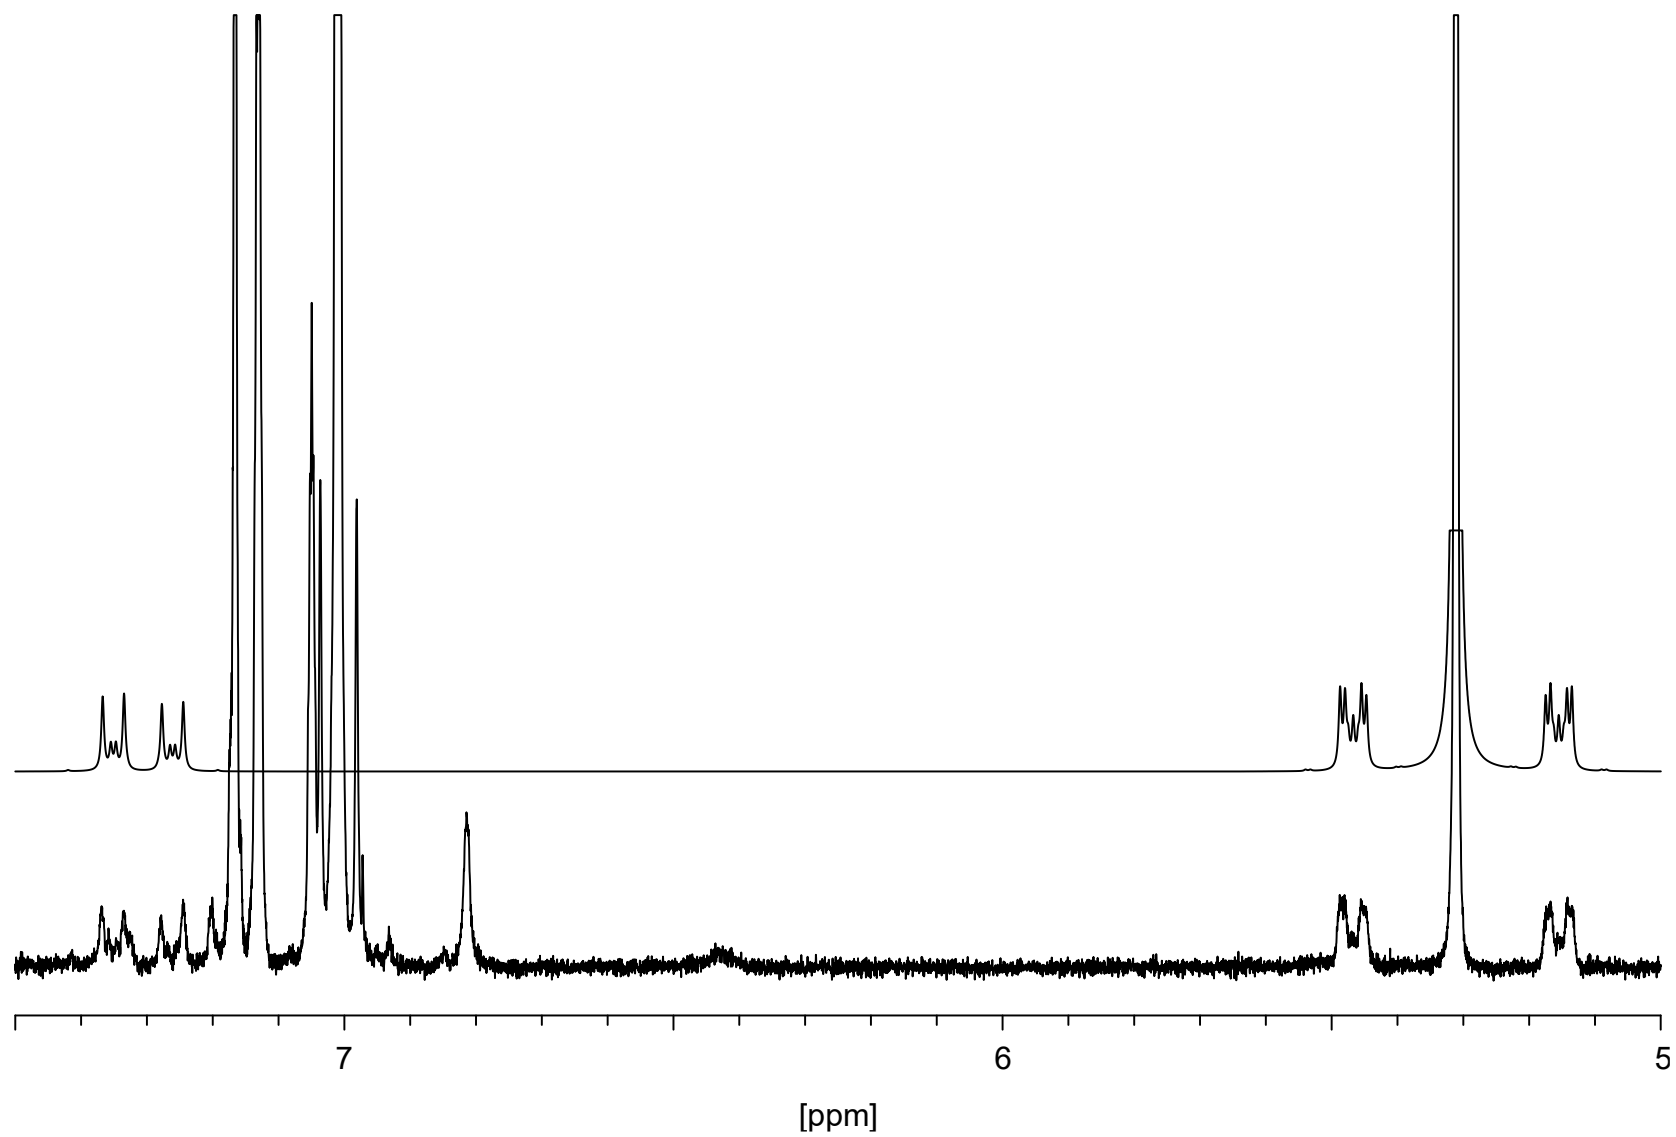

Figure S89. Experimental and calculated  $^1\text{H-NMR}$  of  $(\text{TbbSnH})_2$ .
